# Supplementary material for: Somatic Copy Number Alterations Associated with Japanese or Endometriosis in Ovarian Clear Cell Adenocarcinoma
Source: PLoS One. 2015 Feb 6;10(2):e0116977. doi: 10.1371/journal.pone.0116977 (PMC4319764; doi:10.1371/journal.pone.0116977)
Supplement: S1 Table — (XLSX) [file pone.0116977.s001.xlsx]

## Sheet: Sheet1
ProbeName	Corrected p-value	p-value	regulation	FCAbsolute	Fold change	Log Fold change	GeneSymbol	Description	Entrez Gene	Chromosome	Start	End
A_14_P135316	0.00334511	6.80448e-05	up	1.29304	1.29304	0.370763	2014-09-15	Homo sapiens 15 kDa selenoprotein (SEP15), transcript variant 1, mRNA.	9403	chr1	87350936	87350996
A_16_P15202491	0.00228937	3.31846e-05	down	1.15042	-1.15042	-0.202157	2014-09-15	Homo sapiens 15 kDa selenoprotein (SEP15), transcript variant 1, mRNA.	9403	chr1	87364138	87364198
A_16_P15202412	0.0492988	0.00724052	down	1.08809	-1.08809	-0.121792	2014-09-15	Homo sapiens 15 kDa selenoprotein (SEP15), transcript variant 1, mRNA.	9403	chr1	87337294	87337354
A_14_P127931	0.0146462	0.000945046	up	1.10899	1.10899	0.149244	AADACL4	Homo sapiens arylacetamide deacetylase-like 4 (AADACL4), mRNA.	343066	chr1	12710135	12710195
A_14_P103094	0.0106111	0.000540462	down	1.10572	-1.10572	-0.14498	ABCD3	Homo sapiens ATP-binding cassette, sub-family D (ALD), member 3 (ABCD3), transcript variant 2, mRNA.	5825	chr1	94897593	94897653
A_14_P128113	0.0412187	0.00538204	up	1.16266	1.16266	0.217435	ABCD3	Homo sapiens ATP-binding cassette, sub-family D (ALD), member 3 (ABCD3), transcript variant 1, mRNA.	5825	chr1	94983893	94983953
A_16_P35229513	0.0462323	0.00651927	up	1.08127	1.08127	0.112722	ABCD3	Homo sapiens ATP-binding cassette, sub-family D (ALD), member 3 (ABCD3), transcript variant 2, mRNA.	5825	chr1	94885454	94885514
A_14_P106955	0.0253887	0.00241054	up	1.09284	1.09284	0.128077	ABL2	Homo sapiens v-abl Abelson murine leukemia viral oncogene homolog 2 (arg, Abelson-related gene) (ABL2), transcript variant c, mRNA.	27	chr1	179111997	179112057
A_14_P125430	0.0243671	0.00224853	up	1.14831	1.14831	0.199512	ABL2	Homo sapiens v-abl Abelson murine leukemia viral oncogene homolog 2 (arg, Abelson-related gene) (ABL2), transcript variant f, mRNA.	27	chr1	179185126	179185186
A_14_P127543	0.0223882	0.00195404	down	1.09479	-1.09479	-0.130656	ABL2	Homo sapiens v-abl Abelson murine leukemia viral oncogene homolog 2 (arg, Abelson-related gene) (ABL2), transcript variant f, mRNA.	27	chr1	179167855	179167915
A_14_P114991	0.000911813	5.41484e-06	down	1.18957	-1.18957	-0.250436	ACADM	Homo sapiens acyl-Coenzyme A dehydrogenase, C-4 to C-12 straight chain (ACADM), nuclear gene encoding mitochondrial protein, transcript variant 1, mRNA.	34	chr1	76205636	76205696
A_14_P202414	0.0148657	0.000968848	down	1.09161	-1.09161	-0.126463	ACADM	Homo sapiens acyl-Coenzyme A dehydrogenase, C-4 to C-12 straight chain (ACADM), nuclear gene encoding mitochondrial protein, transcript variant 1, mRNA.	34	chr1	76198508	76198568
A_16_P00203093	0.0316176	0.00346964	up	1.1701	1.1701	0.226633	ACBD6	Homo sapiens acyl-Coenzyme A binding domain containing 6 (ACBD6), mRNA.	84320	chr1	180385335	180385395
A_14_P109155	0.0148657	0.000968848	up	1.10702	1.10702	0.146681	ACOT11	Homo sapiens acyl-CoA thioesterase 11 (ACOT11), transcript variant 2, mRNA.	26027	chr1	55025224	55025284
A_16_P15125188	0.0468282	0.00665813	down	1.07344	-1.07344	-0.102243	ACOT11	Homo sapiens acyl-CoA thioesterase 11 (ACOT11), transcript variant 2, mRNA.	26027	chr1	55044635	55044695
A_16_P00167846	0.0307738	0.00331732	up	1.15237	1.15237	0.204605	ADAR	Homo sapiens adenosine deaminase, RNA-specific (ADAR), transcript variant 1, mRNA.	103	chr1	154577941	154578001
A_16_P35432322	0.00737732	0.000286434	up	1.19612	1.19612	0.258366	ADIPOR1	Homo sapiens adiponectin receptor 1 (ADIPOR1), transcript variant 1, mRNA.	51094	chr1	202922732	202922792
A_16_P15259100	0.0176383	0.0013012	down	1.08927	-1.08927	-0.123367	ADORA3	Homo sapiens adenosine A3 receptor (ADORA3), transcript variant 1, mRNA.	140	chr1	112026042	112026102
A_16_P15259221	0.0223882	0.00195404	up	1.08794	1.08794	0.121602	ADORA3	Homo sapiens adenosine A3 receptor (ADORA3), transcript variant 3, mRNA.	140	chr1	112075890	112075950
A_14_P107574	0.0211963	0.00177786	up	1.14601	1.14601	0.196625	ADSS	Homo sapiens adenylosuccinate synthase (ADSS), mRNA.	159	chr1	244609659	244609719
A_16_P35120987	0.0176383	0.0013012	down	1.08968	-1.08968	-0.123907	AGBL4	Homo sapiens ATP/GTP binding protein-like 4 (AGBL4), mRNA.	84871	chr1	49863156	49863216
A_16_P15114229	0.00560299	0.00017485	down	1.08571	-1.08571	-0.118632	AGBL4	Homo sapiens ATP/GTP binding protein-like 4 (AGBL4), mRNA.	84871	chr1	49913758	49913818
A_14_P115138	0.00869282	0.000384443	down	1.07495	-1.07495	-0.104269	AGBL4	Homo sapiens ATP/GTP binding protein-like 4 (AGBL4), mRNA.	84871	chr1	50355473	50355533
A_14_P133846	0.0462323	0.00651927	down	1.08125	-1.08125	-0.112695	AGBL4	Homo sapiens ATP/GTP binding protein-like 4 (AGBL4), mRNA.	84871	chr1	49239646	49239706
A_16_P35120172	0.0444695	0.0061182	up	1.11004	1.11004	0.15061	AGBL4	Homo sapiens ATP/GTP binding protein-like 4 (AGBL4), mRNA.	84871	chr1	49460279	49460339
A_16_P00061341	0.0189459	0.00146851	down	1.08822	-1.08822	-0.121966	AGBL4	Homo sapiens ATP/GTP binding protein-like 4 (AGBL4), mRNA.	84871	chr1	49142832	49142892
A_16_P35121393	0.0333342	0.00379352	down	1.07091	-1.07091	-0.0988433	AGBL4	Homo sapiens ATP/GTP binding protein-like 4 (AGBL4), mRNA.	84871	chr1	50128098	50128158
A_14_P132606	0.00430443	0.000108206	down	1.10708	-1.10708	-0.146763	AGBL4	Homo sapiens ATP/GTP binding protein-like 4 (AGBL4), mRNA.	84871	chr1	50087713	50087773
A_16_P35120431	0.0019826	2.44098e-05	down	1.13402	-1.13402	-0.181443	AGBL4	Homo sapiens ATP/GTP binding protein-like 4 (AGBL4), mRNA.	84871	chr1	49602255	49602315
A_16_P00062630	0.0243671	0.00224853	down	1.05759	-1.05759	-0.080778	AGBL4	Homo sapiens ATP/GTP binding protein-like 4 (AGBL4), mRNA.	84871	chr1	50251478	50251538
A_16_P15114132	0.00923183	0.000427277	down	1.12418	-1.12418	-0.168871	AGBL4	Homo sapiens ATP/GTP binding protein-like 4 (AGBL4), mRNA.	84871	chr1	49871957	49872017
A_16_P00062023	0.00488325	0.000135848	up	1.23256	1.23256	0.301664	AGBL4	Homo sapiens ATP/GTP binding protein-like 4 (AGBL4), mRNA.	84871	chr1	49621865	49621925
A_16_P15114721	0.0200468	0.00161638	up	1.12892	1.12892	0.174942	AGBL4	Homo sapiens ATP/GTP binding protein-like 4 (AGBL4), mRNA.	84871	chr1	50269666	50269726
A_16_P00061225	0.00623806	0.000212226	up	1.20106	1.20106	0.264306	AGBL4	Homo sapiens ATP/GTP binding protein-like 4 (AGBL4), mRNA.	84871	chr1	49082411	49082470
A_16_P15114093	0.0203308	0.00165543	up	1.1685	1.1685	0.224658	AGBL4	Homo sapiens ATP/GTP binding protein-like 4 (AGBL4), mRNA.	84871	chr1	49853447	49853507
A_16_P15114042	0.0324585	0.00362829	down	1.08153	-1.08153	-0.113071	AGBL4	Homo sapiens ATP/GTP binding protein-like 4 (AGBL4), mRNA.	84871	chr1	49829326	49829386
A_16_P35120797	0.0356416	0.00423691	down	1.07222	-1.07222	-0.100607	AGBL4	Homo sapiens ATP/GTP binding protein-like 4 (AGBL4), mRNA.	84871	chr1	49772201	49772261
A_16_P15114529	0.00726985	0.000278796	down	1.12624	-1.12624	-0.171518	AGBL4	Homo sapiens ATP/GTP binding protein-like 4 (AGBL4), mRNA.	84871	chr1	50107575	50107635
A_16_P35121482	0.0176383	0.0013012	down	1.06599	-1.06599	-0.0921914	AGBL4	Homo sapiens ATP/GTP binding protein-like 4 (AGBL4), mRNA.	84871	chr1	50184891	50184951
A_16_P35120421	0.0240504	0.00219678	down	1.11619	-1.11619	-0.158586	AGBL4	Homo sapiens ATP/GTP binding protein-like 4 (AGBL4), mRNA.	84871	chr1	49591589	49591649
A_16_P15112360	0.00251033	3.98099e-05	down	1.11247	-1.11247	-0.153762	AGBL4	Homo sapiens ATP/GTP binding protein-like 4 (AGBL4), mRNA.	84871	chr1	49113222	49113282
A_16_P00061560	0.00693312	0.00025701	down	1.07298	-1.07298	-0.101619	AGBL4	Homo sapiens ATP/GTP binding protein-like 4 (AGBL4), mRNA.	84871	chr1	49269466	49269526
A_16_P15114275	0.00164857	1.73188e-05	down	1.11399	-1.11399	-0.155733	AGBL4	Homo sapiens ATP/GTP binding protein-like 4 (AGBL4), mRNA.	84871	chr1	49935283	49935343
A_16_P35121115	0.0133989	0.00081324	down	1.18382	-1.18382	-0.243446	AGBL4	Homo sapiens ATP/GTP binding protein-like 4 (AGBL4), mRNA.	84871	chr1	49921975	49922035
A_16_P15114907	0.00632869	0.000218141	down	1.13955	-1.13955	-0.188468	AGBL4	Homo sapiens ATP/GTP binding protein-like 4 (AGBL4), mRNA.	84871	chr1	50428104	50428164
A_14_P122063	0.00117496	8.85462e-06	down	1.12943	-1.12943	-0.175594	AGL	Homo sapiens amylo-1, 6-glucosidase, 4-alpha-glucanotransferase (AGL), transcript variant 1, mRNA.	178	chr1	100340235	100340295
A_16_P00145496	0.0117414	0.000647184	up	1.18661	1.18661	0.246841	AHCYL1	Homo sapiens adenosylhomocysteinase-like 1 (AHCYL1), mRNA.	10768	chr1	110531545	110531605
A_14_P105264	0.0233508	0.00209655	up	1.29595	1.29595	0.374012	AIM2	Homo sapiens absent in melanoma 2 (AIM2), mRNA.	9447	chr1	159033335	159033395
A_14_P201527	0.0186711	0.00143354	down	1.0858	-1.0858	-0.118759	AJAP1	Homo sapiens adherens junctions associated protein 1 (AJAP1), transcript variant 1, mRNA.	55966	chr1	4843658	4843718
A_16_P15077358	0.00201138	2.51763e-05	up	1.22909	1.22909	0.297585	AK2	Homo sapiens adenylate kinase 2 (AK2), transcript variant AK2B, mRNA.	204	chr1	33483877	33483937
A_16_P00084179	0.00301972	5.70058e-05	up	1.25088	1.25088	0.322945	AK3L1	Homo sapiens adenylate kinase 3-like 1 (AK3L1), nuclear gene encoding mitochondrial protein, transcript variant 7, mRNA.	205	chr1	65675387	65675447
A_16_P00101190	0.0401437	0.00515504	down	1.09374	-1.09374	-0.129268	AK5	Homo sapiens adenylate kinase 5 (AK5), transcript variant 1, mRNA.	26289	chr1	77984340	77984396
A_14_P102411	0.00404177	9.64654e-05	up	1.19107	1.19107	0.252257	AK5	Homo sapiens adenylate kinase 5 (AK5), transcript variant 1, mRNA.	26289	chr1	77806170	77806228
A_16_P15179511	0.00430443	0.000108206	down	1.20558	-1.20558	-0.26973	AK5	Homo sapiens adenylate kinase 5 (AK5), transcript variant 1, mRNA.	26289	chr1	77958627	77958687
A_16_P15179267	0.00443799	0.000114571	up	1.27504	1.27504	0.350538	AK5	Homo sapiens adenylate kinase 5 (AK5), transcript variant 1, mRNA.	26289	chr1	77847382	77847442
A_16_P35187816	0.00243094	3.74732e-05	up	1.17267	1.17267	0.229791	AK5	Homo sapiens adenylate kinase 5 (AK5), transcript variant 1, mRNA.	26289	chr1	77853710	77853770
A_16_P15252695	0.0361183	0.00433104	down	1.1353	-1.1353	-0.183073	AKNAD1	Homo sapiens AKNA domain containing 1 (AKNAD1), mRNA.		chr1	109385045	109385105
A_16_P15252650	0.00843639	0.000364565	down	1.10577	-1.10577	-0.14505	AKNAD1	Homo sapiens AKNA domain containing 1 (AKNAD1), mRNA.		chr1	109366741	109366801
A_16_P15512937	0.0236999	0.00214613	up	1.20005	1.20005	0.263093	AKT3	Homo sapiens v-akt murine thymoma viral oncogene homolog 3 (protein kinase B, gamma) (AKT3), transcript variant 2, mRNA.	10000	chr1	243684044	243684104
A_16_P15513272	0.0307738	0.00331732	up	1.16237	1.16237	0.217067	AKT3	Homo sapiens v-akt murine thymoma viral oncogene homolog 3 (protein kinase B, gamma) (AKT3), transcript variant 2, mRNA.	10000	chr1	243849644	243849704
A_14_P135952	0.0037506	8.3477e-05	up	1.2107	1.2107	0.275844	AKT3	Homo sapiens v-akt murine thymoma viral oncogene homolog 3 (protein kinase B, gamma) (AKT3), transcript variant 2, mRNA.	10000	chr1	243913467	243913527
A_16_P00182985	0.0184213	0.00139934	up	1.13065	1.13065	0.177151	ALDH9A1	Homo sapiens aldehyde dehydrogenase 9 family, member A1 (ALDH9A1), mRNA.	223	chr1	165658580	165658640
A_16_P35231156	0.0412187	0.00538204	down	1.07575	-1.07575	-0.105342	ALG14	Homo sapiens asparagine-linked glycosylation 14 homolog (S. cerevisiae) (ALG14), mRNA.	199857	chr1	95506801	95506861
A_16_P35231085	0.00254429	4.10294e-05	down	1.12596	-1.12596	-0.171154	ALG14	Homo sapiens asparagine-linked glycosylation 14 homolog (S. cerevisiae) (ALG14), mRNA.	199857	chr1	95479528	95479588
A_16_P35277375	0.0412187	0.00538204	down	1.1875	-1.1875	-0.247933	AMPD1	Homo sapiens adenosine monophosphate deaminase 1 (isoform M) (AMPD1), mRNA.	270	chr1	115231343	115231403
A_14_P107966	0.0391604	0.00493672	down	1.07665	-1.07665	-0.106543	AMPD2	Homo sapiens adenosine monophosphate deaminase 2 (isoform L) (AMPD2), transcript variant 2, mRNA.	271	chr1	110167648	110167704
A_14_P106718	0.023028	0.00204802	up	1.14796	1.14796	0.199071	ANGEL2	Homo sapiens angel homolog 2 (Drosophila) (ANGEL2), mRNA.	90806	chr1	213167842	213167902
A_14_P136960	0.00949395	0.000450327	down	1.21394	-1.21394	-0.2797	ANKRD13C	Homo sapiens ankyrin repeat domain 13C (ANKRD13C), mRNA.	81573	chr1	70801721	70801781
A_16_P15162918	0.00404177	9.64654e-05	up	1.19441	1.19441	0.256303	ANKRD13C	Homo sapiens ankyrin repeat domain 13C (ANKRD13C), mRNA.	81573	chr1	70773162	70773222
A_14_P111113	0.0214998	0.00182048	up	1.18433	1.18433	0.244075	ANKRD36BL1	Homo sapiens ankyrin repeat domain 36B-like 1 (pseudogene) (ANKRD36BL1), non-coding RNA.		chr1	168215158	168215218
A_14_P110902	0.0450598	0.00624935	up	1.11162	1.11162	0.152667	ANP32E	Homo sapiens acidic (leucine-rich) nuclear phosphoprotein 32 family, member E (ANP32E), transcript variant 3, mRNA.	81611	chr1	150198913	150198972
A_14_P128261	0.0164415	0.00115165	up	1.0857	1.0857	0.11863	ARHGAP29	Homo sapiens Rho GTPase activating protein 29 (ARHGAP29), mRNA.	9411	chr1	94667799	94667859
A_16_P15307022	0.00693312	0.00025701	up	1.16122	1.16122	0.215642	ARHGEF11	Homo sapiens Rho guanine nucleotide exchange factor (GEF) 11 (ARHGEF11), transcript variant 1, mRNA.	9826	chr1	156972296	156972356
A_16_P15306956	0.0115746	0.000630822	up	1.17029	1.17029	0.22686	ARHGEF11	Homo sapiens Rho guanine nucleotide exchange factor (GEF) 11 (ARHGEF11), transcript variant 1, mRNA.	9826	chr1	156948259	156948319
A_14_P120735	0.0486394	0.00709079	down	1.10194	-1.10194	-0.140041	ARID1A	Homo sapiens AT rich interactive domain 1A (SWI-like) (ARID1A), transcript variant 1, mRNA.	8289	chr1	27073934	27073994
A_16_P00033659	0.0361183	0.00433104	up	1.121	1.121	0.164784	ARID1A	Homo sapiens AT rich interactive domain 1A (SWI-like) (ARID1A), transcript variant 1, mRNA.	8289	chr1	27038093	27038153
A_16_P00162929	0.0211963	0.00177786	up	1.15093	1.15093	0.202803	ARNT	Homo sapiens aryl hydrocarbon receptor nuclear translocator (ARNT), transcript variant 1, mRNA.	405	chr1	150783663	150783723
A_16_P00162943	0.0456356	0.00638302	up	1.14061	1.14061	0.189808	ARNT	Homo sapiens aryl hydrocarbon receptor nuclear translocator (ARNT), transcript variant 1, mRNA.	405	chr1	150789546	150789606
A_14_P111644	0.0380994	0.00472681	down	1.05456	-1.05456	-0.0766398	ASAP3	Homo sapiens ArfGAP with SH3 domain, ankyrin repeat and PH domain 3 (ASAP3), transcript variant 2, mRNA.		chr1	23801434	23801482
A_16_P15303128	0.00542561	0.000165367	up	1.20984	1.20984	0.274821	ASH1L	Homo sapiens ash1 (absent, small, or homeotic)-like (Drosophila) (ASH1L), mRNA.	55870	chr1	155330176	155330236
A_14_P138544	0.00560299	0.00017485	up	1.21726	1.21726	0.283632	ASH1L	Homo sapiens ash1 (absent, small, or homeotic)-like (Drosophila) (ASH1L), mRNA.	55870	chr1	155319188	155319248
A_16_P15303416	0.0173928	0.00126993	up	1.18696	1.18696	0.247274	ASH1L	Homo sapiens ash1 (absent, small, or homeotic)-like (Drosophila) (ASH1L), mRNA.	55870	chr1	155501433	155501493
A_16_P15303293	0.0462323	0.00651927	up	1.12662	1.12662	0.172003	ASH1L	Homo sapiens ash1 (absent, small, or homeotic)-like (Drosophila) (ASH1L), mRNA.	55870	chr1	155439821	155439881
A_14_P125721	0.00480856	0.000132061	up	1.19465	1.19465	0.256585	ASH1L	Homo sapiens ash1 (absent, small, or homeotic)-like (Drosophila) (ASH1L), mRNA.	55870	chr1	155451994	155452054
A_14_P139792	0.000929422	5.59715e-06	up	1.48331	1.48331	0.568821	ASPM	Homo sapiens asp (abnormal spindle) homolog, microcephaly associated (Drosophila) (ASPM), mRNA.	259266	chr1	197053395	197053455
A_16_P15399825	0.023028	0.00204802	up	1.12435	1.12435	0.169091	ASPM	Homo sapiens asp (abnormal spindle) homolog, microcephaly associated (Drosophila) (ASPM), mRNA.	259266	chr1	197061167	197061227
A_16_P15353133	0.0371031	0.00452501	up	1.13555	1.13555	0.183389	ASTN1	Homo sapiens astrotactin 1 (ASTN1), transcript variant 1, mRNA.	460	chr1	177043677	177043737
A_16_P15352796	0.0307738	0.00331732	up	1.11506	1.11506	0.157116	ASTN1	Homo sapiens astrotactin 1 (ASTN1), transcript variant 1, mRNA.	460	chr1	176934967	176935027
A_16_P15353009	0.0250427	0.00235539	up	1.24711	1.24711	0.318594	ASTN1	Homo sapiens astrotactin 1 (ASTN1), transcript variant 1, mRNA.	460	chr1	177006896	177006956
A_16_P35368621	0.0287592	0.00296281	up	1.1252	1.1252	0.170176	ASTN1	Homo sapiens astrotactin 1 (ASTN1), transcript variant 1, mRNA.	460	chr1	176957606	176957666
A_16_P35368835	0.00369032	8.10859e-05	up	1.20256	1.20256	0.266113	ASTN1	Homo sapiens astrotactin 1 (ASTN1), transcript variant 1, mRNA.	460	chr1	177025975	177026035
A_16_P00198092	0.0142069	0.000899058	up	1.14018	1.14018	0.189263	ASTN1	Homo sapiens astrotactin 1 (ASTN1), transcript variant 1, mRNA.	460	chr1	176837937	176837997
A_16_P00198441	0.00131774	1.10989e-05	up	1.26444	1.26444	0.338501	ASTN1	Homo sapiens astrotactin 1 (ASTN1), transcript variant 1, mRNA.	460	chr1	177019561	177019621
A_16_P15352768	0.00301972	5.70058e-05	up	1.21076	1.21076	0.275908	ASTN1	Homo sapiens astrotactin 1 (ASTN1), transcript variant 1, mRNA.	460	chr1	176926622	176926682
A_16_P15352880	0.0117414	0.000647184	up	1.10654	1.10654	0.146056	ASTN1	Homo sapiens astrotactin 1 (ASTN1), transcript variant 1, mRNA.	460	chr1	176963000	176963060
A_16_P35003742	0.0107525	0.000554632	down	1.12067	-1.12067	-0.164363	ATAD3A	Homo sapiens ATPase family, AAA domain containing 3A (ATAD3A), nuclear gene encoding mitochondrial protein, transcript variant 2, mRNA.	55210	chr1	1464469	1464514
A_16_P00248668	0.0450598	0.00624935	up	1.06175	1.06175	0.086445	ATF3	Homo sapiens activating transcription factor 3 (ATF3), transcript variant 3, mRNA.	467	chr1	212772817	212772877
A_16_P15317486	0.0159859	0.00109641	up	1.11108	1.11108	0.15196	ATF6	Homo sapiens activating transcription factor 6 (ATF6), mRNA.	22926	chr1	161753736	161753796
A_16_P00177425	0.01382	0.000855151	up	1.15661	1.15661	0.209908	ATF6	Homo sapiens activating transcription factor 6 (ATF6), mRNA.	22926	chr1	161911060	161911120
A_16_P00177364	0.00201138	2.51763e-05	up	1.25948	1.25948	0.332834	ATF6	Homo sapiens activating transcription factor 6 (ATF6), mRNA.	22926	chr1	161868869	161868929
A_16_P15317723	0.0171518	0.00123935	up	1.15792	1.15792	0.211539	ATF6	Homo sapiens activating transcription factor 6 (ATF6), mRNA.	22926	chr1	161844065	161844125
A_16_P15145091	0.0450598	0.00624935	down	1.09948	-1.09948	-0.136818	ATG4C	Homo sapiens ATG4 autophagy related 4 homolog C (S. cerevisiae) (ATG4C), transcript variant 7, mRNA.	84938	chr1	63269405	63269465
A_16_P00080583	0.0126753	0.000735076	down	1.09139	-1.09139	-0.126161	ATG4C	Homo sapiens ATG4 autophagy related 4 homolog C (S. cerevisiae) (ATG4C), transcript variant 7, mRNA.	84938	chr1	63300443	63300503
A_14_P134796	0.0186711	0.00143354	down	1.05185	-1.05185	-0.0729332	ATG4C	Homo sapiens ATG4 autophagy related 4 homolog C (S. cerevisiae) (ATG4C), transcript variant 7, mRNA.	84938	chr1	63307080	63307140
A_16_P00175197	0.00334511	6.80448e-05	up	1.17143	1.17143	0.228272	ATP1A2	Homo sapiens ATPase, Na+/K+ transporting, alpha 2 (+) polypeptide (ATP1A2), mRNA.	477	chr1	160097698	160097758
A_16_P15335185	0.00135262	1.18339e-05	up	1.21611	1.21611	0.282278	ATP1B1	Homo sapiens ATPase, Na+/K+ transporting, beta 1 polypeptide (ATP1B1), transcript variant 2, mRNA.	481	chr1	169077509	169077569
A_16_P15403408	0.0150913	0.000993204	up	1.28435	1.28435	0.361039	ATP6V1G3	Homo sapiens ATPase, H+ transporting, lysosomal 13kDa, V1 subunit G3 (ATP6V1G3), transcript variant 1, mRNA.	127124	chr1	198505761	198505821
A_14_P135342	0.0450598	0.00624935	up	1.12645	1.12645	0.171789	ATPIF1	Homo sapiens ATPase inhibitory factor 1 (ATPIF1), nuclear gene encoding mitochondrial protein, transcript variant 1, mRNA.	93974	chr1	28564147	28564207
A_16_P00279137	0.0117414	0.000647184	up	1.17242	1.17242	0.229489	B3GALNT2	Homo sapiens beta-1,3-N-acetylgalactosaminyltransferase 2 (B3GALNT2), mRNA.	148789	chr1	235621886	235621946
A_16_P35079419	0.0124937	0.000716657	up	1.1467	1.1467	0.197493	BAI2	Homo sapiens brain-specific angiogenesis inhibitor 2 (BAI2), mRNA.	576	chr1	32222872	32222932
A_16_P35355908	0.0186711	0.00143354	up	1.14673	1.14673	0.19752	BAT2L2	Homo sapiens HLA-B associated transcript 2-like 2 (BAT2L2), mRNA.		chr1	171492488	171492548
A_14_P105332	0.0253887	0.00241054	down	1.08043	-1.08043	-0.111611	BCAR3	Homo sapiens breast cancer anti-estrogen resistance 3 (BCAR3), mRNA.	8412	chr1	94107846	94107897
A_14_P103069	0.00595495	0.000195372	up	1.28137	1.28137	0.357684	BLZF1	Homo sapiens basic leucine zipper nuclear factor 1 (BLZF1), mRNA.	8548	chr1	169346247	169346307
A_16_P15335826	0.00386414	8.84604e-05	up	1.22376	1.22376	0.291322	BLZF1	Homo sapiens basic leucine zipper nuclear factor 1 (BLZF1), mRNA.	8548	chr1	169351507	169351567
A_14_P126042	0.0356416	0.00423691	up	1.07843	1.07843	0.10893	BMP8A	Homo sapiens bone morphogenetic protein 8a (BMP8A), mRNA.	353500	chr1	39967560	39967620
A_16_P00260245	0.00726985	0.000278796	up	1.18897	1.18897	0.249712	BPNT1	Homo sapiens 3'(2'), 5'-bisphosphate nucleotidase 1 (BPNT1), mRNA.	10380	chr1	220257307	220257367
A_14_P136000	0.00831134	0.00035499	down	1.13068	-1.13068	-0.177191	BRDT	Homo sapiens bromodomain, testis-specific (BRDT), transcript variant 1, mRNA.	676	chr1	92415007	92415063
A_14_P100123	0.0474384	0.00679964	down	1.07437	-1.07437	-0.10349	BRP44	Homo sapiens brain protein 44 (BRP44), transcript variant 2, mRNA.	25874	chr1	167901228	167901288
A_16_P15119477	0.0433107	0.0058633	up	1.12148	1.12148	0.165403	BTF3L4	Homo sapiens basic transcription factor 3-like 4 (BTF3L4), transcript variant 2, mRNA.	91408	chr1	52551838	52551898
A_14_P118298	0.0171518	0.00123935	up	1.11776	1.11776	0.160614	BTG2	Homo sapiens BTG family, member 2 (BTG2), mRNA.	7832	chr1	203277150	203277207
A_16_P35358147	0.0173928	0.00126993	down	1.16098	-1.16098	-0.215339	C1orf105	Homo sapiens chromosome 1 open reading frame 105 (C1orf105), mRNA.	92346	chr1	172417596	172417656
A_14_P125493	0.00430443	0.000108206	up	1.13184	1.13184	0.178676	C1orf106	Homo sapiens chromosome 1 open reading frame 106 (C1orf106), transcript variant 1, mRNA.	55765	chr1	200881531	200881591
A_14_P138496	0.000188734	3.86946e-08	up	1.40667	1.40667	0.492282	C1orf111	Homo sapiens chromosome 1 open reading frame 111 (C1orf111), mRNA.	284680	chr1	162345710	162345770
A_16_P00201823	0.00416859	0.000102177	up	1.26099	1.26099	0.334562	C1orf125	Homo sapiens chromosome 1 open reading frame 125 (C1orf125), mRNA.	126859	chr1	179452293	179452353
A_14_P111645	0.00632869	0.000218141	up	1.15337	1.15337	0.205859	C1orf125	Homo sapiens chromosome 1 open reading frame 125 (C1orf125), mRNA.	126859	chr1	179523749	179523809
A_16_P15358713	0.000188734	3.86946e-08	up	2.25357	2.25357	1.17221	C1orf125	Homo sapiens chromosome 1 open reading frame 125 (C1orf125), mRNA.	126859	chr1	179469393	179469453
A_16_P15339386	0.0474384	0.00679964	down	1.11981	-1.11981	-0.163256	C1orf129	Homo sapiens chromosome 1 open reading frame 129 (C1orf129), transcript variant 1, mRNA.	80133	chr1	170904682	170904742
A_16_P15059407	0.00151649	1.47898e-05	up	1.29419	1.29419	0.372049	C1orf130	Homo sapiens chromosome 1 open reading frame 130 (C1orf130), mRNA.	400746	chr1	24927787	24927847
A_16_P15062085	0.0171518	0.00123935	up	1.13378	1.13378	0.18114	C1orf135	Homo sapiens chromosome 1 open reading frame 135 (C1orf135), mRNA.	79000	chr1	26182217	26182275
A_16_P00032599	0.0396677	0.00504481	up	1.10425	1.10425	0.14306	C1orf135	Homo sapiens chromosome 1 open reading frame 135 (C1orf135), mRNA.	79000	chr1	26162260	26162320
A_14_P139468	0.0153171	0.00101813	up	1.18378	1.18378	0.243405	C1orf14	Homo sapiens chromosome 1 open reading frame 14 (C1orf14), mRNA.	81626	chr1	182920484	182920544
A_16_P15155688	0.00748636	0.000294269	up	1.13794	1.13794	0.186427	C1orf141	Homo sapiens chromosome 1 open reading frame 141 (C1orf141), mRNA.	400757	chr1	67592877	67592937
A_16_P00086853	0.0192154	0.00150426	down	1.06433	-1.06433	-0.0899457	C1orf141	Homo sapiens chromosome 1 open reading frame 141 (C1orf141), mRNA.	400757	chr1	67565928	67565988
A_16_P15215086	0.0287592	0.00296281	down	1.0872	-1.0872	-0.120621	C1orf146	Homo sapiens chromosome 1 open reading frame 146 (C1orf146), mRNA.	388649	chr1	92684641	92684701
A_14_P139494	0.00672488	0.000243384	up	1.27362	1.27362	0.348936	C1orf151	Homo sapiens chromosome 1 open reading frame 151 (C1orf151), mRNA.	440574	chr1	19946429	19946489
A_16_P00153603	0.00979613	0.000474534	down	1.1534	-1.1534	-0.205889	C1orf161	Homo sapiens chromosome 1 open reading frame 161 (C1orf161), mRNA.	126868	chr1	116662126	116662186
A_16_P00071651	0.0140134	0.000876849	down	1.07869	-1.07869	-0.109286	C1orf168	Homo sapiens chromosome 1 open reading frame 168 (C1orf168), mRNA.	199920	chr1	57193764	57193824
A_16_P00097241	0.0450598	0.00624935	up	1.11342	1.11342	0.155	C1orf173	Homo sapiens chromosome 1 open reading frame 173 (C1orf173), mRNA.	127254	chr1	75091431	75091491
A_16_P00068859	0.0480379	0.00694384	up	1.10535	1.10535	0.1445	C1orf175	Homo sapiens chromosome 1 open reading frame 175 (C1orf175), transcript variant 1, mRNA.	374977	chr1	55150541	55150601
A_16_P00068892	0.00301972	5.70058e-05	down	1.10543	-1.10543	-0.144613	C1orf175	Homo sapiens chromosome 1 open reading frame 175 (C1orf175), transcript variant 1, mRNA.	374977	chr1	55169738	55169798
A_16_P00147974	0.0468282	0.00665813	down	1.05434	-1.05434	-0.0763369	C1orf183	Homo sapiens chromosome 1 open reading frame 183 (C1orf183), transcript variant 1, mRNA.	55924	chr1	112266806	112266865
A_16_P00058252	0.0132204	0.000793006	up	1.09728	1.09728	0.133931	C1orf190	Homo sapiens chromosome 1 open reading frame 190 (C1orf190), mRNA.	541468	chr1	46686417	46686477
A_16_P15058947	0.0346805	0.0040542	up	1.14818	1.14818	0.199354	C1orf201	Homo sapiens chromosome 1 open reading frame 201 (C1orf201), mRNA.	90529	chr1	24718696	24718756
A_16_P35062614	0.0226946	0.00200052	up	1.1233	1.1233	0.167748	C1orf201	Homo sapiens chromosome 1 open reading frame 201 (C1orf201), mRNA.	90529	chr1	24727866	24727926
A_16_P15370783	0.0181468	0.00136589	up	1.10172	1.10172	0.139753	C1orf21	Homo sapiens chromosome 1 open reading frame 21 (C1orf21), mRNA.	81563	chr1	184452934	184452994
A_14_P115660	0.0112314	0.000599247	down	1.08515	-1.08515	-0.117901	C1orf21	Homo sapiens chromosome 1 open reading frame 21 (C1orf21), mRNA.	81563	chr1	184512850	184512910
A_16_P00209114	0.0155433	0.00104363	up	1.15234	1.15234	0.204571	C1orf21	Homo sapiens chromosome 1 open reading frame 21 (C1orf21), mRNA.	81563	chr1	184525419	184525479
A_16_P35387400	0.0272173	0.00270447	up	1.12426	1.12426	0.168972	C1orf21	Homo sapiens chromosome 1 open reading frame 21 (C1orf21), mRNA.	81563	chr1	184495816	184495876
A_14_P200048	0.00748636	0.000294269	up	1.20051	1.20051	0.263653	C1orf220	Homo sapiens chromosome 1 open reading frame 220 (C1orf220), mRNA.	400798	chr1	178517685	178517745
A_16_P15372672	0.0316176	0.00346964	down	1.0829	-1.0829	-0.114894	C1orf26	Homo sapiens chromosome 1 open reading frame 26 (C1orf26), transcript variant 2, mRNA.	54823	chr1	185207022	185207082
A_14_P130581	0.0333342	0.00379352	up	1.1327	1.1327	0.179771	C1orf43	Homo sapiens chromosome 1 open reading frame 43 (C1orf43), transcript variant 3, mRNA.	25912	chr1	154187017	154187077
A_16_P35207576	0.0211963	0.00177786	down	1.08741	-1.08741	-0.120892	C1orf52	Homo sapiens chromosome 1 open reading frame 52 (C1orf52), transcript variant 1, mRNA.	148423	chr1	85718201	85718261
A_14_P116712	0.012114	0.000681097	up	1.2258	1.2258	0.293724	C1orf55	Homo sapiens chromosome 1 open reading frame 55 (C1orf55), mRNA.	163859	chr1	226172906	226172966
A_16_P15305368	0.013608	0.000833951	up	1.12933	1.12933	0.175472	C1orf61	Homo sapiens chromosome 1 open reading frame 61 (C1orf61), mRNA.	10485	chr1	156384167	156384227
A_14_P120178	0.00254429	4.10294e-05	down	1.28262	-1.28262	-0.359094	C1orf63	Homo sapiens chromosome 1 open reading frame 63 (C1orf63), mRNA.	57035	chr1	25573493	25573539
A_14_P101869	0.0406627	0.00526743	up	1.12555	1.12555	0.170625	C1orf63	Homo sapiens chromosome 1 open reading frame 63 (C1orf63), mRNA.	57035	chr1	25570059	25570112
A_16_P00170620	0.0176383	0.0013012	up	1.16168	1.16168	0.216216	C1orf66	Homo sapiens chromosome 1 open reading frame 66 (C1orf66), transcript variant 2, mRNA.	51093	chr1	156699315	156699375
A_14_P130537	0.0380994	0.00472681	down	1.08687	-1.08687	-0.120182	C1orf74	Homo sapiens chromosome 1 open reading frame 74 (C1orf74), mRNA.	148304	chr1	209955874	209955934
A_16_P00054794	0.00251033	3.98099e-05	up	1.24383	1.24383	0.314787	C1orf84	Homo sapiens chromosome 1 open reading frame 84 (C1orf84), mRNA.	149469	chr1	43855915	43855975
A_14_P103175	0.0144184	0.000921786	down	1.08258	-1.08258	-0.114473	C1orf87	Homo sapiens chromosome 1 open reading frame 87 (C1orf87), mRNA.	127795	chr1	60474425	60474482
A_16_P00192444	0.00182914	2.08987e-05	up	1.23173	1.23173	0.300686	C1orf9	Homo sapiens chromosome 1 open reading frame 9 (C1orf9), transcript variant 1, mRNA.	51430	chr1	172544725	172544785
A_14_P102429	0.0366139	0.00442706	up	1.12781	1.12781	0.173528	C1orf9	Homo sapiens chromosome 1 open reading frame 9 (C1orf9), transcript variant 1, mRNA.	51430	chr1	172560125	172560185
A_14_P113508	0.00502757	0.000143731	up	1.24751	1.24751	0.319057	C1orf94	Homo sapiens chromosome 1 open reading frame 94 (C1orf94), transcript variant 2, mRNA.	84970	chr1	34663744	34663804
A_16_P15471717	0.0486394	0.00709079	up	1.1111	1.1111	0.15199	C1orf95	Homo sapiens chromosome 1 open reading frame 95 (C1orf95), mRNA.	375057	chr1	226771070	226771130
A_14_P132860	0.00131774	1.10989e-05	up	1.25503	1.25503	0.327719	C1orf96	Homo sapiens chromosome 1 open reading frame 96 (C1orf96), mRNA.	126731	chr1	229466865	229466925
A_16_P35453930	0.0200468	0.00161638	up	1.20757	1.20757	0.272107	C1orf97	Homo sapiens chromosome 1 open reading frame 97 (C1orf97), non-coding RNA.	84791	chr1	211590355	211590415
A_14_P106837	0.00301972	5.70058e-05	down	1.13145	-1.13145	-0.178177	C1QC	Homo sapiens complement component 1, q subcomponent, C chain (C1QC), transcript variant 1, mRNA.	714	chr1	22974553	22974613
A_14_P134479	0.00496116	0.000139737	down	1.17674	-1.17674	-0.234799	C4BPA	Homo sapiens complement component 4 binding protein, alpha (C4BPA), mRNA.	722	chr1	207318227	207318287
A_16_P35138007	0.0110621	0.000584017	down	1.11731	-1.11731	-0.160035	C8A	Homo sapiens complement component 8, alpha polypeptide (C8A), mRNA.	731	chr1	57338681	57338741
A_16_P00071906	0.00119575	9.14633e-06	down	1.11209	-1.11209	-0.15327	C8A	Homo sapiens complement component 8, alpha polypeptide (C8A), mRNA.	731	chr1	57364860	57364920
A_14_P127632	0.0243671	0.00224853	up	1.1454	1.1454	0.195854	CABC1	Homo sapiens chaperone, ABC1 activity of bc1 complex homolog (S. pombe) (CABC1), nuclear gene encoding mitochondrial protein, mRNA.	56997	chr1	227154700	227154760
A_14_P116144	0.00110258	7.77429e-06	down	1.16042	-1.16042	-0.214644	CACHD1	Homo sapiens cache domain containing 1 (CACHD1), mRNA.	57685	chr1	65016262	65016322
A_14_P116719	0.0386297	0.00483074	down	1.0685	-1.0685	-0.0955889	CACHD1	Homo sapiens cache domain containing 1 (CACHD1), mRNA.	57685	chr1	65098060	65098120
A_16_P15149423	0.0223882	0.00195404	down	1.08491	-1.08491	-0.117577	CACHD1	Homo sapiens cache domain containing 1 (CACHD1), mRNA.	57685	chr1	64986315	64986375
A_16_P00204998	0.0468282	0.00665813	down	1.07867	-1.07867	-0.109251	CACNA1E	Homo sapiens calcium channel, voltage-dependent, R type, alpha 1E subunit (CACNA1E), mRNA.	777	chr1	181717714	181717774
A_16_P15364224	0.00936608	0.00043866	up	1.13122	1.13122	0.177874	CACNA1E	Homo sapiens calcium channel, voltage-dependent, R type, alpha 1E subunit (CACNA1E), mRNA.	777	chr1	181759192	181759252
A_16_P15363883	0.00386414	8.84604e-05	up	1.21077	1.21077	0.275929	CACNA1E	Homo sapiens calcium channel, voltage-dependent, R type, alpha 1E subunit (CACNA1E), mRNA.	777	chr1	181648241	181648301
A_16_P15363649	0.0337869	0.00387867	up	1.13073	1.13073	0.177255	CACNA1E	Homo sapiens calcium channel, voltage-dependent, R type, alpha 1E subunit (CACNA1E), mRNA.	777	chr1	181564128	181564188
A_16_P00231554	0.0186711	0.00143354	down	1.12934	-1.12934	-0.175483	CAMSAP1L1	Homo sapiens calmodulin regulated spectrin-associated protein 1-like 1 (CAMSAP1L1), mRNA.	23271	chr1	200722679	200722739
A_16_P00231684	0.0184213	0.00139934	up	1.18025	1.18025	0.239087	CAMSAP1L1	Homo sapiens calmodulin regulated spectrin-associated protein 1-like 1 (CAMSAP1L1), mRNA.	23271	chr1	200817805	200817865
A_14_P110992	0.00251033	3.98099e-05	up	1.27205	1.27205	0.347154	CAMSAP1L1	Homo sapiens calmodulin regulated spectrin-associated protein 1-like 1 (CAMSAP1L1), mRNA.	23271	chr1	200774754	200774814
A_16_P00009150	0.0144184	0.000921786	down	1.12763	-1.12763	-0.173295	CAMTA1	Homo sapiens calmodulin binding transcription activator 1 (CAMTA1), mRNA.	23261	chr1	7579155	7579215
A_16_P15017495	0.00949395	0.000450327	up	1.20911	1.20911	0.273943	CAMTA1	Homo sapiens calmodulin binding transcription activator 1 (CAMTA1), mRNA.	23261	chr1	7131630	7131690
A_16_P00008618	0.0240504	0.00219678	down	1.20995	-1.20995	-0.274949	CAMTA1	Homo sapiens calmodulin binding transcription activator 1 (CAMTA1), mRNA.	23261	chr1	7216710	7216770
A_16_P15018747	0.0320304	0.00354816	down	1.09556	-1.09556	-0.131673	CAMTA1	Homo sapiens calmodulin binding transcription activator 1 (CAMTA1), mRNA.	23261	chr1	7630341	7630401
A_16_P15017406	0.0417366	0.00549888	up	1.17003	1.17003	0.226545	CAMTA1	Homo sapiens calmodulin binding transcription activator 1 (CAMTA1), mRNA.	23261	chr1	7101666	7101726
A_16_P00008517	0.0417366	0.00549888	down	1.08606	-1.08606	-0.119099	CAMTA1	Homo sapiens calmodulin binding transcription activator 1 (CAMTA1), mRNA.	23261	chr1	7149421	7149481
A_16_P00009075	0.0456356	0.00638302	up	1.11179	1.11179	0.152883	CAMTA1	Homo sapiens calmodulin binding transcription activator 1 (CAMTA1), mRNA.	23261	chr1	7537425	7537483
A_16_P00008824	0.0456356	0.00638302	down	1.08001	-1.08001	-0.111048	CAMTA1	Homo sapiens calmodulin binding transcription activator 1 (CAMTA1), mRNA.	23261	chr1	7382334	7382394
A_16_P15018033	0.0291367	0.00303081	down	1.07643	-1.07643	-0.106256	CAMTA1	Homo sapiens calmodulin binding transcription activator 1 (CAMTA1), mRNA.	23261	chr1	7360994	7361054
A_16_P35018348	0.0396677	0.00504481	down	1.05451	-1.05451	-0.0765667	CAMTA1	Homo sapiens calmodulin binding transcription activator 1 (CAMTA1), mRNA.	23261	chr1	7019180	7019240
A_16_P15017789	0.00488325	0.000135848	up	1.19865	1.19865	0.261408	CAMTA1	Homo sapiens calmodulin binding transcription activator 1 (CAMTA1), mRNA.	23261	chr1	7256821	7256881
A_16_P00008990	0.0328606	0.00371007	up	1.11679	1.11679	0.159359	CAMTA1	Homo sapiens calmodulin binding transcription activator 1 (CAMTA1), mRNA.	23261	chr1	7496745	7496805
A_14_P130075	0.00437113	0.000111346	up	1.20009	1.20009	0.263145	CAP1	Homo sapiens CAP, adenylate cyclase-associated protein 1 (yeast) (CAP1), transcript variant 2, mRNA.	10487	chr1	40509661	40509721
A_16_P15465642	0.00705482	0.000264088	up	1.27577	1.27577	0.351365	CAPN2	Homo sapiens calpain 2, (m/II) large subunit (CAPN2), transcript variant 2, mRNA.	824	chr1	223962618	223962678
A_14_P119598	0.000911813	5.41484e-06	down	1.15523	-1.15523	-0.208186	CASQ2	Homo sapiens calsequestrin 2 (cardiac muscle) (CASQ2), mRNA.	845	chr1	116310564	116310624
A_16_P00013497	0.0456356	0.00638302	down	1.07031	-1.07031	-0.0980297	CASZ1	Homo sapiens castor zinc finger 1 (CASZ1), transcript variant 1, mRNA.	54897	chr1	10742168	10742228
A_16_P15026018	0.0150913	0.000993204	up	1.12752	1.12752	0.17315	CASZ1	Homo sapiens castor zinc finger 1 (CASZ1), transcript variant 1, mRNA.	54897	chr1	10697092	10697150
A_14_P130659	0.0075986	0.000302303	down	1.08824	-1.08824	-0.121991	CCBL2	Homo sapiens cysteine conjugate-beta lyase 2 (CCBL2), transcript variant 1, mRNA.	56267	chr1	89456652	89456712
A_16_P00117792	0.0474384	0.00679964	down	1.0744	-1.0744	-0.103531	CCBL2	Homo sapiens cysteine conjugate-beta lyase 2 (CCBL2), transcript variant 1, mRNA.	56267	chr1	89409044	89409104
A_16_P35216827	0.00643374	0.000224211	down	1.1055	-1.1055	-0.144704	CCBL2	Homo sapiens cysteine conjugate-beta lyase 2 (CCBL2), transcript variant 1, mRNA.	56267	chr1	89420791	89420851
A_16_P00123407	0.0450598	0.00624935	down	1.10889	-1.10889	-0.149111	CCDC18	Homo sapiens coiled-coil domain containing 18 (CCDC18), mRNA.	343099	chr1	93744016	93744076
A_16_P15217105	0.00206755	2.67786e-05	down	1.12507	-1.12507	-0.170014	CCDC18	Homo sapiens coiled-coil domain containing 18 (CCDC18), mRNA.	343099	chr1	93680316	93680376
A_16_P15217088	0.013608	0.000833951	down	1.08327	-1.08327	-0.115398	CCDC18	Homo sapiens coiled-coil domain containing 18 (CCDC18), mRNA.	343099	chr1	93672698	93672758
A_16_P00003817	0.00551857	0.000170046	down	1.14063	-1.14063	-0.189835	CCDC27	Homo sapiens coiled-coil domain containing 27 (CCDC27), mRNA.	148870	chr1	3687939	3687998
A_16_P15099357	0.0178973	0.00133319	up	1.12528	1.12528	0.170281	CCDC30	Homo sapiens coiled-coil domain containing 30 (CCDC30), mRNA.		chr1	43046933	43046993
A_16_P15233800	0.0192154	0.00150426	down	1.10401	-1.10401	-0.142752	CCDC76	Homo sapiens coiled-coil domain containing 76 (CCDC76), mRNA.	54482	chr1	100602620	100602680
A_14_P135309	0.0272173	0.00270447	down	1.07341	-1.07341	-0.102198	CCNL2	Homo sapiens cyclin L2 (CCNL2), transcript variant 2, mRNA.	81669	chr1	1321719	1321765
A_16_P21685135	0.0396677	0.00504481	down	1.14242	-1.14242	-0.19209	CCNL2	Homo sapiens cyclin L2 (CCNL2), transcript variant 2, mRNA.	81669	chr1	1323052	1323101
A_16_P15305170	0.030343	0.00324347	up	1.10304	1.10304	0.141486	CCT3	Homo sapiens chaperonin containing TCP1, subunit 3 (gamma) (CCT3), transcript variant 3, mRNA.	7203	chr1	156303417	156303477
A_14_P108302	0.00466429	0.000124782	up	1.17677	1.17677	0.234833	CCT3	Homo sapiens chaperonin containing TCP1, subunit 3 (gamma) (CCT3), transcript variant 3, mRNA.	7203	chr1	156286230	156286290
A_14_P108155	0.00235688	3.52671e-05	down	1.19906	-1.19906	-0.2619	CD101	Homo sapiens CD101 molecule (CD101), mRNA.		chr1	117546639	117546699
A_14_P106744	0.0438892	0.00598953	down	1.09345	-1.09345	-0.128882	CD101	Homo sapiens CD101 molecule (CD101), mRNA.		chr1	117578047	117578107
A_16_P35283041	0.00301972	5.70058e-05	down	1.20288	-1.20288	-0.266488	CD101	Homo sapiens CD101 molecule (CD101), mRNA.		chr1	117569407	117569467
A_14_P127974	0.0412187	0.00538204	down	1.13486	-1.13486	-0.182513	CD1A	Homo sapiens CD1a molecule (CD1A), mRNA.	909	chr1	158224392	158224452
A_14_P137877	0.0186711	0.00143354	up	1.13926	1.13926	0.188101	CD244	Homo sapiens CD244 molecule, natural killer cell receptor 2B4 (CD244), transcript variant 2, mRNA.	51744	chr1	160825967	160826027
A_16_P15315560	0.0295122	0.00310024	up	1.12317	1.12317	0.167571	CD244	Homo sapiens CD244 molecule, natural killer cell receptor 2B4 (CD244), transcript variant 2, mRNA.	51744	chr1	160803034	160803094
A_16_P15426516	0.0108926	0.000569148	up	1.22829	1.22829	0.296648	CD46	Homo sapiens CD46 molecule, complement regulatory protein (CD46), transcript variant a, mRNA.	4179	chr1	207963898	207963958
A_16_P35444749	0.00443799	0.000114571	down	1.2183	-1.2183	-0.284874	CD46	Homo sapiens CD46 molecule, complement regulatory protein (CD46), transcript variant a, mRNA.	4179	chr1	207958444	207958504
A_16_P00175998	0.0178973	0.00133319	up	1.17057	1.17057	0.227214	CD48	Homo sapiens CD48 molecule (CD48), mRNA.	962	chr1	160674698	160674758
A_14_P103836	0.0275847	0.00276705	down	1.10019	-1.10019	-0.137755	CD53	Homo sapiens CD53 molecule (CD53), transcript variant 1, mRNA.	963	chr1	111440416	111440471
A_16_P00146985	0.00271983	4.62715e-05	down	1.14878	-1.14878	-0.200104	CD53	Homo sapiens CD53 molecule (CD53), transcript variant 1, mRNA.	963	chr1	111422204	111422264
A_14_P108998	0.0106111	0.000540462	down	1.10442	-1.10442	-0.143292	CD58	Homo sapiens CD58 molecule (CD58), transcript variant 1, mRNA.	965	chr1	117078580	117078640
A_16_P00154278	0.0480379	0.00694384	down	1.10108	-1.10108	-0.138919	CD58	Homo sapiens CD58 molecule (CD58), transcript variant 1, mRNA.	965	chr1	117086928	117086988
A_16_P00133824	0.0283729	0.00289619	down	1.11182	-1.11182	-0.152919	CDC14A	Homo sapiens CDC14 cell division cycle 14 homolog A (S. cerevisiae) (CDC14A), transcript variant 3, mRNA.	8556	chr1	100908477	100908537
A_14_P107876	0.0462323	0.00651927	down	1.09985	-1.09985	-0.13731	CDC20	Homo sapiens cell division cycle 20 homolog (S. cerevisiae) (CDC20), mRNA.	991	chr1	43825374	43825421
A_16_P15473123	0.00672488	0.000243384	up	1.18754	1.18754	0.247979	CDC42BPA	Homo sapiens CDC42 binding protein kinase alpha (DMPK-like) (CDC42BPA), transcript variant B, mRNA.	8476	chr1	227307542	227307602
A_16_P15473414	0.0366139	0.00442706	down	1.08297	-1.08297	-0.114989	CDC42BPA	Homo sapiens CDC42 binding protein kinase alpha (DMPK-like) (CDC42BPA), transcript variant B, mRNA.	8476	chr1	227454361	227454421
A_16_P15473143	0.0450598	0.00624935	up	1.16497	1.16497	0.220292	CDC42BPA	Homo sapiens CDC42 binding protein kinase alpha (DMPK-like) (CDC42BPA), transcript variant B, mRNA.	8476	chr1	227315185	227315245
A_16_P15473106	0.0312139	0.0033927	up	1.15161	1.15161	0.203656	CDC42BPA	Homo sapiens CDC42 binding protein kinase alpha (DMPK-like) (CDC42BPA), transcript variant B, mRNA.	8476	chr1	227300323	227300382
A_16_P00121074	0.010101	0.000499949	down	1.12945	-1.12945	-0.175625	CDC7	Homo sapiens cell division cycle 7 homolog (S. cerevisiae) (CDC7), transcript variant 2, mRNA.	8317	chr1	91973850	91973910
A_14_P106218	0.0192154	0.00150426	down	1.13849	-1.13849	-0.187124	CDC73	Homo sapiens cell division cycle 73, Paf1/RNA polymerase II complex component, homolog (S. cerevisiae) (CDC73), mRNA.	79577	chr1	193220241	193220301
A_16_P15391172	0.0333342	0.00379352	down	1.08921	-1.08921	-0.123278	CDC73	Homo sapiens cell division cycle 73, Paf1/RNA polymerase II complex component, homolog (S. cerevisiae) (CDC73), mRNA.	79577	chr1	193168353	193168413
A_14_P138936	0.012114	0.000681097	down	1.101	-1.101	-0.138819	CDC73	Homo sapiens cell division cycle 73, Paf1/RNA polymerase II complex component, homolog (S. cerevisiae) (CDC73), mRNA.	79577	chr1	193119403	193119463
A_14_P102594	0.0462323	0.00651927	up	1.11871	1.11871	0.161839	CDK11B	Homo sapiens cyclin-dependent kinase 11B (CDK11B), transcript variant 2, mRNA.		chr1	1585573	1585633
A_16_P00000754	0.0361183	0.00433104	down	1.06556	-1.06556	-0.0916112	CDK11B	Homo sapiens cyclin-dependent kinase 11B (CDK11B), transcript variant 2, mRNA.		chr1	1653978	1654038
A_16_P15421415	0.0178973	0.00133319	down	1.49033	-1.49033	-0.575633	CDK18	Homo sapiens cyclin-dependent kinase 18 (CDK18), transcript variant 3, mRNA.		chr1	205497424	205497484
A_16_P00202469	0.00770608	0.000310543	down	1.11848	-1.11848	-0.161535	CEP350	Homo sapiens centrosomal protein 350kDa (CEP350), mRNA.	9857	chr1	179959689	179959749
A_16_P15258402	0.0337869	0.00387867	up	1.05435	1.05435	0.0763547	CEPT1	Homo sapiens choline/ethanolamine phosphotransferase 1 (CEPT1), transcript variant 2, mRNA.	10390	chr1	111724937	111724997
A_16_P00225903	0.0307738	0.00331732	down	1.10949	-1.10949	-0.149894	CFH	Homo sapiens complement factor H (CFH), transcript variant 1, mRNA.	3075	chr1	196705000	196705060
A_14_P137451	0.0391604	0.00493672	down	1.0945	-1.0945	-0.130271	CFH	Homo sapiens complement factor H (CFH), transcript variant 2, mRNA.	3075	chr1	196623118	196623178
A_14_P102601	0.0153171	0.00101813	down	1.12342	-1.12342	-0.167902	CFH	Homo sapiens complement factor H (CFH), transcript variant 1, mRNA.	3075	chr1	196711089	196711149
A_16_P00163900	0.0250427	0.00235539	up	1.14117	1.14117	0.190515	CGN	Homo sapiens cingulin (CGN), mRNA.	57530	chr1	151511053	151511113
A_16_P00007145	0.00509575	0.000147833	down	1.15662	-1.15662	-0.209918	CHD5	Homo sapiens chromodomain helicase DNA binding protein 5 (CHD5), mRNA.	450091///26038	chr1	6189675	6189735
A_16_P00007121	0.00422931	0.000105151	down	1.16377	-1.16377	-0.21881	CHD5	Homo sapiens chromodomain helicase DNA binding protein 5 (CHD5), mRNA.	450091///26038	chr1	6165141	6165201
A_16_P15258562	0.0240504	0.00219678	down	1.11473	-1.11473	-0.156688	CHI3L2	Homo sapiens chitinase 3-like 2 (CHI3L2), transcript variant 2, mRNA.	1117	chr1	111777545	111777605
A_14_P100450	0.0272173	0.00270447	down	1.08963	-1.08963	-0.12384	CHIA	Homo sapiens chitinase, acidic (CHIA), transcript variant 2, mRNA.	27159	chr1	111856968	111857028
A_16_P35523996	0.00993265	0.000487087	up	1.18561	1.18561	0.245635	CHRM3	Homo sapiens cholinergic receptor, muscarinic 3 (CHRM3), mRNA.	1131	chr1	239885363	239885423
A_16_P00285559	0.0181468	0.00136589	up	1.1714	1.1714	0.228232	CHRM3	Homo sapiens cholinergic receptor, muscarinic 3 (CHRM3), mRNA.	1131	chr1	239940370	239940430
A_14_P121189	0.0194917	0.00154081	down	1.12027	-1.12027	-0.163852	CHRM3	Homo sapiens cholinergic receptor, muscarinic 3 (CHRM3), mRNA.	1131	chr1	239990617	239990677
A_16_P15301112	0.0217786	0.00186404	up	1.12271	1.12271	0.16699	CHRNB2	Homo sapiens cholinergic receptor, nicotinic, beta 2 (neuronal) (CHRNB2), mRNA.	1141	chr1	154550748	154550808
A_14_P127745	0.0113969	0.000614846	up	1.12076	1.12076	0.164474	CKS1B	Homo sapiens CDC28 protein kinase regulatory subunit 1B (CKS1B), transcript variant 1, mRNA.	1163	chr1	154950079	154950139
A_16_P00114039	0.00049627	1.48601e-06	down	1.14989	-1.14989	-0.201494	CLCA1	Homo sapiens chloride channel accessory 1 (CLCA1), mRNA.	1179	chr1	86934517	86934577
A_16_P15201465	0.0375783	0.00462491	down	1.10376	-1.10376	-0.142428	CLCA2	Homo sapiens chloride channel accessory 2 (CLCA2), mRNA.	9635	chr1	86890963	86891023
A_14_P113831	0.0211963	0.00177786	down	1.08363	-1.08363	-0.115875	CLCC1	Homo sapiens chloride channel CLIC-like 1 (CLCC1), transcript variant 1, mRNA.	23155	chr1	109479216	109479276
A_16_P00020138	0.00895595	0.000405332	up	1.10017	1.10017	0.137732	CLCNKA	Homo sapiens chloride channel Ka (CLCNKA), transcript variant 2, mRNA.	1187	chr1	16357780	16357834
A_14_P138183	0.0396677	0.00504481	up	1.09081	1.09081	0.125396	CLK2	Homo sapiens CDC-like kinase 2 (CLK2), mRNA.	1196	chr1	155232846	155232906
A_14_P110458	0.0316176	0.00346964	up	1.09564	1.09564	0.13178	CLSTN1	Homo sapiens calsyntenin 1 (CLSTN1), transcript variant 1, mRNA.	22883	chr1	9844658	9844718
A_14_P122127	0.0287592	0.00296281	up	1.10109	1.10109	0.138938	CMPK1	Homo sapiens cytidine monophosphate (UMP-CMP) kinase 1, cytosolic (CMPK1), transcript variant 2, mRNA.	51727	chr1	47815117	47815177
A_16_P15467606	0.00228937	3.31846e-05	up	1.21552	1.21552	0.281569	CNIH3	Homo sapiens cornichon homolog 3 (Drosophila) (CNIH3), mRNA.	149111	chr1	224842420	224842480
A_14_P100311	0.0115746	0.000630822	up	1.75693	1.75693	0.813059	CNIH3	Homo sapiens cornichon homolog 3 (Drosophila) (CNIH3), mRNA.	149111	chr1	224928193	224928253
A_14_P130732	0.0351611	0.00414464	down	1.12385	-1.12385	-0.168451	CNN3	Homo sapiens calponin 3, acidic (CNN3), mRNA.	1266	chr1	95387338	95387398
A_16_P15420202	0.016217	0.00112372	up	1.31894	1.31894	0.399377	CNTN2	Homo sapiens contactin 2 (axonal) (CNTN2), mRNA.	6900	chr1	205037884	205037943
A_16_P00272183	0.0272173	0.00270447	up	1.14735	1.14735	0.198302	COG2	Homo sapiens component of oligomeric golgi complex 2 (COG2), transcript variant 2, mRNA.	22796	chr1	230786776	230786836
A_16_P15239957	0.00993265	0.000487087	down	1.10417	-1.10417	-0.142965	COL11A1	Homo sapiens collagen, type XI, alpha 1 (COL11A1), transcript variant D, mRNA.	1301	chr1	103414985	103415045
A_16_P35250095	0.0333342	0.00379352	down	1.10926	-1.10926	-0.149601	COL11A1	Homo sapiens collagen, type XI, alpha 1 (COL11A1), transcript variant D, mRNA.	1301	chr1	103461382	103461442
A_14_P137465	0.00422931	0.000105151	down	1.16673	-1.16673	-0.222466	COL11A1	Homo sapiens collagen, type XI, alpha 1 (COL11A1), transcript variant D, mRNA.	1301	chr1	103573856	103573915
A_16_P00136938	0.00534202	0.000160808	down	1.1169	-1.1169	-0.159505	COL11A1	Homo sapiens collagen, type XI, alpha 1 (COL11A1), transcript variant D, mRNA.	1301	chr1	103363089	103363149
A_14_P127575	0.00191953	2.29429e-05	down	1.09151	-1.09151	-0.12633	COL11A1	Homo sapiens collagen, type XI, alpha 1 (COL11A1), transcript variant D, mRNA.	1301	chr1	103487286	103487346
A_16_P00137258	0.00770608	0.000310543	down	1.13908	-1.13908	-0.18787	COL11A1	Homo sapiens collagen, type XI, alpha 1 (COL11A1), transcript variant D, mRNA.	1301	chr1	103548396	103548456
A_16_P35249890	0.016217	0.00112372	down	1.11493	-1.11493	-0.156959	COL11A1	Homo sapiens collagen, type XI, alpha 1 (COL11A1), transcript variant D, mRNA.	1301	chr1	103404627	103404687
A_16_P15240368	0.00292669	5.37196e-05	down	1.13034	-1.13034	-0.176759	COL11A1	Homo sapiens collagen, type XI, alpha 1 (COL11A1), transcript variant D, mRNA.	1301	chr1	103556970	103557030
A_16_P35250038	0.0233508	0.00209655	down	1.09135	-1.09135	-0.126112	COL11A1	Homo sapiens collagen, type XI, alpha 1 (COL11A1), transcript variant D, mRNA.	1301	chr1	103444980	103445040
A_16_P15240175	0.00683881	0.00025011	down	1.15785	-1.15785	-0.211453	COL11A1	Homo sapiens collagen, type XI, alpha 1 (COL11A1), transcript variant D, mRNA.	1301	chr1	103477535	103477595
A_16_P35249953	0.0112314	0.000599247	down	1.0805	-1.0805	-0.111702	COL11A1	Homo sapiens collagen, type XI, alpha 1 (COL11A1), transcript variant D, mRNA.	1301	chr1	103423761	103423821
A_16_P15200431	0.00882591	0.000394759	down	1.09287	-1.09287	-0.128116	COL24A1	Homo sapiens collagen, type XXIV, alpha 1 (COL24A1), mRNA.	255631	chr1	86418723	86418783
A_16_P35209385	0.00502757	0.000143731	down	1.09546	-1.09546	-0.131538	COL24A1	Homo sapiens collagen, type XXIV, alpha 1 (COL24A1), mRNA.	255631	chr1	86458538	86458598
A_16_P15200499	0.00212862	2.84776e-05	up	1.39814	1.39814	0.483507	COL24A1	Homo sapiens collagen, type XXIV, alpha 1 (COL24A1), mRNA.	255631	chr1	86452539	86452599
A_16_P00113141	0.00993265	0.000487087	down	1.11196	-1.11196	-0.153106	COL24A1	Homo sapiens collagen, type XXIV, alpha 1 (COL24A1), mRNA.	255631	chr1	86249818	86249878
A_16_P15200352	0.0178973	0.00133319	down	1.14741	-1.14741	-0.198375	COL24A1	Homo sapiens collagen, type XXIV, alpha 1 (COL24A1), mRNA.	255631	chr1	86375556	86375616
A_16_P15200600	0.0371031	0.00452501	down	1.14011	-1.14011	-0.189178	COL24A1	Homo sapiens collagen, type XXIV, alpha 1 (COL24A1), mRNA.	255631	chr1	86497960	86498020
A_16_P00113571	0.0324585	0.00362829	down	1.11015	-1.11015	-0.150759	COL24A1	Homo sapiens collagen, type XXIV, alpha 1 (COL24A1), mRNA.	255631	chr1	86601432	86601492
A_16_P00113179	0.0104243	0.00052663	down	1.09977	-1.09977	-0.137207	COL24A1	Homo sapiens collagen, type XXIV, alpha 1 (COL24A1), mRNA.	255631	chr1	86283658	86283718
A_16_P00113095	0.00748636	0.000294269	down	1.08935	-1.08935	-0.123461	COL24A1	Homo sapiens collagen, type XXIV, alpha 1 (COL24A1), mRNA.	255631	chr1	86210454	86210514
A_14_P125027	0.00238881	3.63543e-05	down	1.11676	-1.11676	-0.159314	COL24A1	Homo sapiens collagen, type XXIV, alpha 1 (COL24A1), mRNA.	255631	chr1	86524821	86524881
A_16_P15200069	0.0153171	0.00101813	up	1.17745	1.17745	0.235664	COL24A1	Homo sapiens collagen, type XXIV, alpha 1 (COL24A1), mRNA.	255631	chr1	86241319	86241379
A_16_P00175471	0.00560299	0.00017485	up	1.24316	1.24316	0.314014	COPA	Homo sapiens coatomer protein complex, subunit alpha (COPA), transcript variant 1, mRNA.	1314	chr1	160259752	160259812
A_14_P132433	0.0150913	0.000993204	up	1.10449	1.10449	0.143384	COPA	Homo sapiens coatomer protein complex, subunit alpha (COPA), transcript variant 1, mRNA.	1314	chr1	160295339	160295391
A_14_P126325	0.0428059	0.00573948	down	1.07098	-1.07098	-0.0989315	CPT2	Homo sapiens carnitine palmitoyltransferase 2 (CPT2), nuclear gene encoding mitochondrial protein, mRNA.	1376	chr1	53679749	53679809
A_14_P104531	0.0123084	0.000698666	up	1.18366	1.18366	0.243256	CPT2	Homo sapiens carnitine palmitoyltransferase 2 (CPT2), nuclear gene encoding mitochondrial protein, mRNA.	1376	chr1	53675706	53675763
A_16_P35417477	0.0261198	0.00252442	up	1.15564	1.15564	0.208694	CRB1	Homo sapiens crumbs homolog 1 (Drosophila) (CRB1), mRNA.	23418	chr1	197346613	197346673
A_16_P00226718	0.0422732	0.00561802	up	1.11763	1.11763	0.160443	CRB1	Homo sapiens crumbs homolog 1 (Drosophila) (CRB1), mRNA.	23418	chr1	197390574	197390634
A_14_P137720	0.0351611	0.00414464	up	1.13358	1.13358	0.180889	CRCT1	Homo sapiens cysteine-rich C-terminal 1 (CRCT1), mRNA.	54544	chr1	152487572	152487632
A_14_P116859	0.0220936	0.00190855	down	1.43661	-1.43661	-0.522672	CREB3L4	Homo sapiens cAMP responsive element binding protein 3-like 4 (CREB3L4), mRNA.	148327	chr1	153946763	153946823
A_16_P00097408	0.00923183	0.000427277	down	1.07668	-1.07668	-0.106584	CRYZ	Homo sapiens crystallin, zeta (quinone reductase) (CRYZ), transcript variant 1, mRNA.	1429	chr1	75179472	75179532
A_14_P100569	0.0130419	0.000773242	down	1.08552	-1.08552	-0.118386	CRYZ	Homo sapiens crystallin, zeta (quinone reductase) (CRYZ), transcript variant 1, mRNA.	1429	chr1	75172780	75172840
A_16_P15266497	0.00466429	0.000124782	down	1.16217	-1.16217	-0.216815	CSDE1	Homo sapiens cold shock domain containing E1, RNA-binding (CSDE1), transcript variant 1, mRNA.	7812	chr1	115297365	115297425
A_16_P15266447	0.0462323	0.00651927	up	1.10362	1.10362	0.142241	CSDE1	Homo sapiens cold shock domain containing E1, RNA-binding (CSDE1), transcript variant 1, mRNA.	7812	chr1	115282379	115282439
A_14_P112480	0.00534202	0.000160808	up	1.14625	1.14625	0.196921	CSF1	Homo sapiens colony stimulating factor 1 (macrophage) (CSF1), transcript variant 2, mRNA.	1435	chr1	110462638	110462692
A_14_P103968	0.0450598	0.00624935	down	1.12613	-1.12613	-0.17138	CSF1	Homo sapiens colony stimulating factor 1 (macrophage) (CSF1), transcript variant 2, mRNA.	1435	chr1	110464509	110464566
A_16_P15085176	0.0316176	0.00346964	down	1.10407	-1.10407	-0.142829	CSF3R	Homo sapiens colony stimulating factor 3 receptor (granulocyte) (CSF3R), transcript variant 1, mRNA.	1441	chr1	36938389	36938444
A_14_P116299	0.0132204	0.000793006	down	1.073	-1.073	-0.101646	CSMD2	Homo sapiens CUB and Sushi multiple domains 2 (CSMD2), mRNA.	114784	chr1	34610181	34610241
A_16_P00042454	0.00831134	0.00035499	up	1.17443	1.17443	0.231966	CSMD2	Homo sapiens CUB and Sushi multiple domains 2 (CSMD2), mRNA.	114784	chr1	34414222	34414282
A_16_P00041900	0.0307738	0.00331732	up	1.09934	1.09934	0.136643	CSMD2	Homo sapiens CUB and Sushi multiple domains 2 (CSMD2), mRNA.	114784	chr1	34058160	34058220
A_16_P15079283	0.0375783	0.00462491	up	1.0869	1.0869	0.120219	CSMD2	Homo sapiens CUB and Sushi multiple domains 2 (CSMD2), mRNA.	114784	chr1	34276216	34276276
A_16_P15079562	0.0173928	0.00126993	up	1.12766	1.12766	0.173333	CSMD2	Homo sapiens CUB and Sushi multiple domains 2 (CSMD2), mRNA.	114784	chr1	34381947	34382007
A_16_P00042012	0.0211963	0.00177786	up	1.12015	1.12015	0.163697	CSMD2	Homo sapiens CUB and Sushi multiple domains 2 (CSMD2), mRNA.	114784	chr1	34124622	34124682
A_16_P15078549	0.00301972	5.70058e-05	up	1.18193	1.18193	0.241147	CSMD2	Homo sapiens CUB and Sushi multiple domains 2 (CSMD2), mRNA.	114784	chr1	33989611	33989671
A_16_P00041882	0.0474384	0.00679964	down	1.07422	-1.07422	-0.103285	CSMD2	Homo sapiens CUB and Sushi multiple domains 2 (CSMD2), mRNA.	114784	chr1	34049222	34049281
A_16_P35083729	0.0153171	0.00101813	down	1.07353	-1.07353	-0.102365	CSMD2	Homo sapiens CUB and Sushi multiple domains 2 (CSMD2), mRNA.	114784	chr1	34093655	34093715
A_16_P35083646	0.0155433	0.00104363	up	1.12722	1.12722	0.172765	CSMD2	Homo sapiens CUB and Sushi multiple domains 2 (CSMD2), mRNA.	114784	chr1	34072748	34072808
A_14_P139396	0.00632869	0.000218141	up	1.17909	1.17909	0.237674	CSRP1	Homo sapiens cysteine and glycine-rich protein 1 (CSRP1), transcript variant 1, mRNA.	1465	chr1	201460750	201460810
A_16_P00239675	0.0189459	0.00146851	down	1.08601	-1.08601	-0.119041	CTSE	Homo sapiens cathepsin E (CTSE), transcript variant 1, mRNA.	1510	chr1	206331222	206331282
A_16_P15422853	0.00643374	0.000224211	down	1.1607	-1.1607	-0.214995	CTSE	Homo sapiens cathepsin E (CTSE), transcript variant 1, mRNA.	1510	chr1	206321698	206321758
A_14_P115591	0.00831134	0.00035499	up	1.13893	1.13893	0.187679	CTSK	Homo sapiens cathepsin K (CTSK), mRNA.	1513	chr1	150771640	150771695
A_16_P00162843	0.0361183	0.00433104	up	1.1232	1.1232	0.167619	CTSS	Homo sapiens cathepsin S (CTSS), mRNA.	1520	chr1	150715831	150715891
A_16_P15292478	0.0299319	0.00317112	up	1.12402	1.12402	0.168668	CTSS	Homo sapiens cathepsin S (CTSS), mRNA.	1520	chr1	150705551	150705611
A_16_P15261454	0.0351611	0.00414464	up	1.14852	1.14852	0.199772	CTTNBP2NL	Homo sapiens CTTNBP2 N-terminal like (CTTNBP2NL), mRNA.	55917	chr1	112982659	112982719
A_16_P00149107	0.0164415	0.00115165	down	1.10236	-1.10236	-0.140593	CTTNBP2NL	Homo sapiens CTTNBP2 N-terminal like (CTTNBP2NL), mRNA.	55917	chr1	112991564	112991624
A_16_P15261402	0.00473557	0.000128373	down	1.20479	-1.20479	-0.268778	CTTNBP2NL	Homo sapiens CTTNBP2 N-terminal like (CTTNBP2NL), mRNA.	55917	chr1	112958736	112958796
A_14_P109192	0.00254429	4.10294e-05	up	1.15171	1.15171	0.203774	CYB5R1	Homo sapiens cytochrome b5 reductase 1 (CYB5R1), mRNA.	51706	chr1	202934918	202934978
A_16_P15256964	0.00693312	0.00025701	down	1.08919	-1.08919	-0.123259	CYMP	Homo sapiens chymosin pseudogene (CYMP), non-coding RNA.	643160	chr1	111026029	111026089
A_14_P102838	0.00882591	0.000394759	down	1.09332	-1.09332	-0.128714	CYP2J2	Homo sapiens cytochrome P450, family 2, subfamily J, polypeptide 2 (CYP2J2), mRNA.	1573	chr1	60391712	60391772
A_14_P136485	0.0371031	0.00452501	up	1.10096	1.10096	0.138756	CYP4A11	Homo sapiens cytochrome P450, family 4, subfamily A, polypeptide 11 (CYP4A11), mRNA.	1579	chr1	47397396	47397456
A_16_P00059216	0.0391604	0.00493672	up	1.07666	1.07666	0.106559	CYP4Z1	Homo sapiens cytochrome P450, family 4, subfamily Z, polypeptide 1 (CYP4Z1), mRNA.	199974	chr1	47578668	47578728
A_16_P00059082	0.00796057	0.000327657	down	1.13751	-1.13751	-0.185873	CYP4Z2P	Homo sapiens cytochrome P450, family 4, subfamily Z, polypeptide 2 pseudogene (CYP4Z2P), non-coding RNA.	163720	chr1	47364939	47364999
A_16_P00072777	0.0444695	0.0061182	down	1.07267	-1.07267	-0.101201	DAB1	Homo sapiens disabled homolog 1 (Drosophila) (DAB1), mRNA.	1600	chr1	57865961	57866021
A_16_P15131968	0.0456356	0.00638302	down	1.1153	-1.1153	-0.157433	DAB1	Homo sapiens disabled homolog 1 (Drosophila) (DAB1), mRNA.	1600	chr1	57857076	57857136
A_16_P15132653	0.00606379	0.000200845	down	1.08759	-1.08759	-0.121132	DAB1	Homo sapiens disabled homolog 1 (Drosophila) (DAB1), mRNA.	1600	chr1	58130715	58130775
A_16_P15132816	0.0371031	0.00452501	down	1.07349	-1.07349	-0.102313	DAB1	Homo sapiens disabled homolog 1 (Drosophila) (DAB1), mRNA.	1600	chr1	58208690	58208750
A_16_P35139279	0.0130419	0.000773242	down	1.12495	-1.12495	-0.16986	DAB1	Homo sapiens disabled homolog 1 (Drosophila) (DAB1), mRNA.	1600	chr1	57764683	57764743
A_16_P00072385	0.010101	0.000499949	down	1.09938	-1.09938	-0.136693	DAB1	Homo sapiens disabled homolog 1 (Drosophila) (DAB1), mRNA.	1600	chr1	57640444	57640504
A_16_P15132612	0.0130419	0.000773242	down	1.07559	-1.07559	-0.105124	DAB1	Homo sapiens disabled homolog 1 (Drosophila) (DAB1), mRNA.	1600	chr1	58116884	58116944
A_16_P15133116	0.00672488	0.000243384	down	1.08055	-1.08055	-0.11176	DAB1	Homo sapiens disabled homolog 1 (Drosophila) (DAB1), mRNA.	1600	chr1	58330519	58330579
A_16_P00073862	0.0233508	0.00209655	down	1.06244	-1.06244	-0.0873869	DAB1	Homo sapiens disabled homolog 1 (Drosophila) (DAB1), mRNA.	1600	chr1	58591417	58591477
A_16_P00073342	0.0132204	0.000793006	down	1.13795	-1.13795	-0.18644	DAB1	Homo sapiens disabled homolog 1 (Drosophila) (DAB1), mRNA.	1600	chr1	58268844	58268904
A_16_P00072415	0.016217	0.00112372	down	1.12933	-1.12933	-0.175474	DAB1	Homo sapiens disabled homolog 1 (Drosophila) (DAB1), mRNA.	1600	chr1	57656502	57656562
A_16_P15131432	0.00231935	3.42108e-05	down	1.10053	-1.10053	-0.138203	DAB1	Homo sapiens disabled homolog 1 (Drosophila) (DAB1), mRNA.	1600	chr1	57670565	57670625
A_16_P00072251	0.0307738	0.00331732	down	1.10231	-1.10231	-0.140535	DAB1	Homo sapiens disabled homolog 1 (Drosophila) (DAB1), mRNA.	1600	chr1	57562024	57562084
A_16_P00072563	0.00215918	2.93651e-05	down	1.12667	-1.12667	-0.172063	DAB1	Homo sapiens disabled homolog 1 (Drosophila) (DAB1), mRNA.	1600	chr1	57741068	57741128
A_16_P15133252	0.0333342	0.00379352	down	1.06476	-1.06476	-0.0905341	DAB1	Homo sapiens disabled homolog 1 (Drosophila) (DAB1), mRNA.	1600	chr1	58383482	58383542
A_16_P15133522	0.0113969	0.000614846	down	1.08476	-1.08476	-0.117376	DAB1	Homo sapiens disabled homolog 1 (Drosophila) (DAB1), mRNA.	1600	chr1	58489498	58489558
A_16_P00073055	0.013608	0.000833951	down	1.07969	-1.07969	-0.110612	DAB1	Homo sapiens disabled homolog 1 (Drosophila) (DAB1), mRNA.	1600	chr1	58066332	58066392
A_16_P35139603	0.0366139	0.00442706	down	1.06307	-1.06307	-0.0882367	DAB1	Homo sapiens disabled homolog 1 (Drosophila) (DAB1), mRNA.	1600	chr1	57876812	57876872
A_16_P35139304	0.0307738	0.00331732	down	1.06708	-1.06708	-0.0936656	DAB1	Homo sapiens disabled homolog 1 (Drosophila) (DAB1), mRNA.	1600	chr1	57773828	57773888
A_16_P15132723	0.0444695	0.0061182	down	1.06877	-1.06877	-0.0959467	DAB1	Homo sapiens disabled homolog 1 (Drosophila) (DAB1), mRNA.	1600	chr1	58170743	58170803
A_16_P00072688	0.0144184	0.000921786	up	1.19002	1.19002	0.25099	DAB1	Homo sapiens disabled homolog 1 (Drosophila) (DAB1), mRNA.	1600	chr1	57815221	57815281
A_16_P00073904	0.00993265	0.000487087	down	1.06993	-1.06993	-0.097518	DAB1	Homo sapiens disabled homolog 1 (Drosophila) (DAB1), mRNA.	1600	chr1	58623436	58623496
A_16_P15130987	0.0291367	0.00303081	up	1.18914	1.18914	0.249922	DAB1	Homo sapiens disabled homolog 1 (Drosophila) (DAB1), mRNA.	1600	chr1	57518317	57518377
A_14_P122519	0.00411082	9.92823e-05	down	1.10469	-1.10469	-0.143638	DBT	Homo sapiens dihydrolipoamide branched chain transacylase E2 (DBT), nuclear gene encoding mitochondrial protein, mRNA.	1629	chr1	100661610	100661670
A_16_P15233951	0.0197544	0.00157818	down	1.12189	-1.12189	-0.165928	DBT	Homo sapiens dihydrolipoamide branched chain transacylase E2 (DBT), nuclear gene encoding mitochondrial protein, mRNA.	1629	chr1	100671700	100671760
A_16_P00175422	0.000547339	1.8953e-06	up	1.26443	1.26443	0.338486	DCAF8	Homo sapiens DDB1 and CUL4 associated factor 8 (DCAF8), transcript variant 2, transcribed RNA.		chr1	160224975	160225035
A_16_P15302254	0.0189459	0.00146851	up	1.17883	1.17883	0.237353	DCST2	Homo sapiens DC-STAMP domain containing 2 (DCST2), mRNA.	127579	chr1	154996080	154996140
A_16_P15199240	0.00560299	0.00017485	down	1.10595	-1.10595	-0.145282	DDAH1	Homo sapiens dimethylarginine dimethylaminohydrolase 1 (DDAH1), transcript variant 1, mRNA.	23576	chr1	85899068	85899127
A_16_P35208062	0.0342432	0.00396555	down	1.0889	-1.0889	-0.122877	DDAH1	Homo sapiens dimethylarginine dimethylaminohydrolase 1 (DDAH1), transcript variant 1, mRNA.	23576	chr1	85905182	85905242
A_14_P133796	0.0226946	0.00200052	down	1.092	-1.092	-0.126977	DDAH1	Homo sapiens dimethylarginine dimethylaminohydrolase 1 (DDAH1), transcript variant 1, mRNA.	23576	chr1	85817169	85817229
A_16_P35208183	0.00443799	0.000114571	down	1.12985	-1.12985	-0.176133	DDAH1	Homo sapiens dimethylarginine dimethylaminohydrolase 1 (DDAH1), transcript variant 2, mRNA.	23576	chr1	85943239	85943299
A_16_P00112488	0.0356416	0.00423691	down	1.10593	-1.10593	-0.14526	DDAH1	Homo sapiens dimethylarginine dimethylaminohydrolase 1 (DDAH1), transcript variant 1, mRNA.	23576	chr1	85795562	85795622
A_16_P00112613	0.0342432	0.00396555	down	1.1	-1.1	-0.137508	DDAH1	Homo sapiens dimethylarginine dimethylaminohydrolase 1 (DDAH1), transcript variant 1, mRNA.	23576	chr1	85878319	85878379
A_16_P15199587	0.00705482	0.000264088	up	1.24013	1.24013	0.310489	DDAH1	Homo sapiens dimethylarginine dimethylaminohydrolase 1 (DDAH1), transcript variant 2, mRNA.	23576	chr1	86027562	86027622
A_16_P15199067	0.00345408	7.21537e-05	down	1.14074	-1.14074	-0.189972	DDAH1	Homo sapiens dimethylarginine dimethylaminohydrolase 1 (DDAH1), transcript variant 1, mRNA.	23576	chr1	85824428	85824488
A_16_P00112808	0.0422732	0.00561802	down	1.0795	-1.0795	-0.110363	DDAH1	Homo sapiens dimethylarginine dimethylaminohydrolase 1 (DDAH1), transcript variant 2, mRNA.	23576	chr1	86006134	86006194
A_14_P109945	0.0169113	0.00120946	down	1.06191	-1.06191	-0.0866653	DDOST	Homo sapiens dolichyl-diphosphooligosaccharide-protein glycosyltransferase (DDOST), mRNA.	1650	chr1	20984261	20984321
A_14_P104103	0.0133989	0.00081324	down	1.10145	-1.10145	-0.139403	DDX20	Homo sapiens DEAD (Asp-Glu-Ala-Asp) box polypeptide 20 (DDX20), mRNA.	11218	chr1	112305141	112305201
A_14_P107093	0.00231935	3.42108e-05	up	1.18544	1.18544	0.245422	DENND1B	Homo sapiens DENN/MADD domain containing 1B (DENND1B), transcript variant 1, mRNA.	163486	chr1	197641247	197641307
A_16_P00227122	0.0433107	0.0058633	down	1.12231	-1.12231	-0.16647	DENND1B	Homo sapiens DENN/MADD domain containing 1B (DENND1B), transcript variant 1, mRNA.	163486	chr1	197624972	197625032
A_14_P114088	0.0462323	0.00651927	up	1.10258	1.10258	0.14088	DENND1B	Homo sapiens DENN/MADD domain containing 1B (DENND1B), transcript variant 1, mRNA.	163486	chr1	197546846	197546906
A_16_P15400886	0.0480379	0.00694384	up	1.12492	1.12492	0.169821	DENND1B	Homo sapiens DENN/MADD domain containing 1B (DENND1B), transcript variant 1, mRNA.	163486	chr1	197490096	197490156
A_14_P133694	0.00215918	2.93651e-05	up	1.5073	1.5073	0.591966	DENND1B	Homo sapiens DENN/MADD domain containing 1B (DENND1B), transcript variant 1, mRNA.	163486	chr1	197743791	197743851
A_14_P200029	0.000849951	4.58538e-06	down	1.12871	-1.12871	-0.174672	DENND2C	Homo sapiens DENN/MADD domain containing 2C (DENND2C), mRNA.	163259	chr1	115204738	115204798
A_14_P112006	0.0107525	0.000554632	down	1.11682	-1.11682	-0.159402	DENND2D	Homo sapiens DENN/MADD domain containing 2D (DENND2D), mRNA.	79961	chr1	111742253	111742310
A_14_P139126	0.00398274	9.37239e-05	down	1.0596	-1.0596	-0.0835201	DEPDC1	Homo sapiens DEP domain containing 1 (DEPDC1), transcript variant 1, mRNA.	55635	chr1	68942861	68942921
A_14_P201751	0.0189459	0.00146851	down	1.08709	-1.08709	-0.120476	DFFB	Homo sapiens DNA fragmentation factor, 40kDa, beta polypeptide (caspase-activated DNase) (DFFB), mRNA.	1677	chr1	3800049	3800106
A_16_P00003969	0.0148657	0.000968848	down	1.1179	-1.1179	-0.160787	DFFB	Homo sapiens DNA fragmentation factor, 40kDa, beta polypeptide (caspase-activated DNase) (DFFB), mRNA.	1677	chr1	3787778	3787836
A_16_P35067411	0.00525734	0.000156369	up	1.17626	1.17626	0.234205	DHDDS	Homo sapiens dehydrodolichyl diphosphate synthase (DHDDS), transcript variant 1, mRNA.	79947	chr1	26769622	26769682
A_16_P00016195	0.0307738	0.00331732	down	1.14126	-1.14126	-0.190625	DHRS3	Homo sapiens dehydrogenase/reductase (SDR family) member 3 (DHRS3), mRNA.	9249	chr1	12657545	12657605
A_16_P15366595	0.000235889	1.61787e-07	up	1.30025	1.30025	0.378786	DHX9	Homo sapiens DEAH (Asp-Glu-Ala-His) box polypeptide 9 (DHX9), mRNA.	1660	chr1	182818231	182818291
A_16_P00088142	0.00806983	0.000336541	down	1.12213	-1.12213	-0.166237	DIRAS3	Homo sapiens DIRAS family, GTP-binding RAS-like 3 (DIRAS3), mRNA.	9077	chr1	68515870	68515929
A_14_P134090	0.0428059	0.00573948	up	1.09345	1.09345	0.128891	DIRAS3	Homo sapiens DIRAS family, GTP-binding RAS-like 3 (DIRAS3), mRNA.	9077	chr1	68511913	68511973
A_14_P101054	0.00748636	0.000294269	up	1.14059	1.14059	0.189775	DMAP1	Homo sapiens DNA methyltransferase 1 associated protein 1 (DMAP1), transcript variant 2, mRNA.	55929	chr1	44683333	44683386
A_16_P00063426	0.0128595	0.000753935	down	1.10241	-1.10241	-0.140656	DMRTA2	Homo sapiens DMRT-like family A2 (DMRTA2), mRNA.	63950	chr1	50887442	50887502
A_14_P100301	0.00231935	3.42108e-05	up	1.25222	1.25222	0.324491	DNAH14	Homo sapiens dynein, axonemal, heavy chain 14 (DNAH14), transcript variant 1, mRNA.	127602	chr1	225339712	225339772
A_16_P15468696	0.0150913	0.000993204	up	1.16367	1.16367	0.218683	DNAH14	Homo sapiens dynein, axonemal, heavy chain 14 (DNAH14), transcript variant 1, mRNA.	127602	chr1	225477900	225477960
A_16_P35487662	0.0474384	0.00679964	up	1.16247	1.16247	0.217192	DNAH14	Homo sapiens dynein, axonemal, heavy chain 14 (DNAH14), transcript variant 2, mRNA.	127602	chr1	225211426	225211486
A_16_P15468461	0.00856655	0.000374381	up	1.16939	1.16939	0.225756	DNAH14	Homo sapiens dynein, axonemal, heavy chain 14 (DNAH14), transcript variant 1, mRNA.	127602	chr1	225288119	225288179
A_16_P35487947	0.00404177	9.64654e-05	up	1.1924	1.1924	0.253865	DNAH14	Homo sapiens dynein, axonemal, heavy chain 14 (DNAH14), transcript variant 1, mRNA.	127602	chr1	225446242	225446302
A_16_P15468282	0.00783203	0.000318992	up	1.14068	1.14068	0.189894	DNAH14	Homo sapiens dynein, axonemal, heavy chain 14 (DNAH14), transcript variant 2, mRNA.	127602	chr1	225139843	225139903
A_16_P00007858	0.0299319	0.00317112	down	1.11618	-1.11618	-0.158566	DNAJC11	Homo sapiens DnaJ (Hsp40) homolog, subfamily C, member 11 (DNAJC11), mRNA.	55735	chr1	6706765	6706825
A_16_P15151334	0.0164415	0.00115165	up	1.14919	1.14919	0.200623	DNAJC6	Homo sapiens DnaJ (Hsp40) homolog, subfamily C, member 6 (DNAJC6), mRNA.	9829	chr1	65736254	65736314
A_14_P125278	0.0220936	0.00190855	up	1.1701	1.1701	0.226628	DNAJC6	Homo sapiens DnaJ (Hsp40) homolog, subfamily C, member 6 (DNAJC6), mRNA.	9829	chr1	65831794	65831854
A_16_P15151629	0.0450598	0.00624935	down	1.09191	-1.09191	-0.12685	DNAJC6	Homo sapiens DnaJ (Hsp40) homolog, subfamily C, member 6 (DNAJC6), mRNA.	9829	chr1	65861502	65861562
A_14_P113947	0.0211963	0.00177786	down	1.10043	-1.10043	-0.138064	DNAJC6	Homo sapiens DnaJ (Hsp40) homolog, subfamily C, member 6 (DNAJC6), mRNA.	9829	chr1	65764833	65764893
A_16_P35159629	0.0417366	0.00549888	down	1.08617	-1.08617	-0.119251	DNAJC6	Homo sapiens DnaJ (Hsp40) homolog, subfamily C, member 6 (DNAJC6), mRNA.	9829	chr1	65876861	65876921
A_16_P00111114	0.0178973	0.00133319	down	1.14429	-1.14429	-0.194449	DNASE2B	Homo sapiens deoxyribonuclease II beta (DNASE2B), transcript variant 1, mRNA.	58511	chr1	84878187	84878247
A_16_P15341970	0.0474384	0.00679964	up	1.10642	1.10642	0.145905	DNM3	Homo sapiens dynamin 3 (DNM3), transcript variant 2, mRNA.	26052	chr1	172124319	172124379
A_16_P00191594	0.0123084	0.000698666	up	1.19304	1.19304	0.25464	DNM3	Homo sapiens dynamin 3 (DNM3), transcript variant 2, mRNA.	26052	chr1	172019385	172019445
A_16_P15342148	0.00247542	3.86248e-05	up	1.17205	1.17205	0.229035	DNM3	Homo sapiens dynamin 3 (DNM3), transcript variant 2, mRNA.	26052	chr1	172198631	172198691
A_16_P15341940	0.00726985	0.000278796	up	1.33032	1.33032	0.411777	DNM3	Homo sapiens dynamin 3 (DNM3), transcript variant 2, mRNA.	26052	chr1	172116161	172116221
A_16_P35357479	0.0433107	0.0058633	up	1.10324	1.10324	0.141742	DNM3	Homo sapiens dynamin 3 (DNM3), transcript variant 2, mRNA.	26052	chr1	172151587	172151647
A_16_P15342001	0.0351611	0.00414464	up	1.1135	1.1135	0.155101	DNM3	Homo sapiens dynamin 3 (DNM3), transcript variant 2, mRNA.	26052	chr1	172138231	172138291
A_16_P15341952	0.000251246	2.02791e-07	up	1.5488	1.5488	0.631148	DNM3	Homo sapiens dynamin 3 (DNM3), transcript variant 2, mRNA.	26052	chr1	172119287	172119347
A_16_P15342099	0.00322769	6.41579e-05	up	1.25183	1.25183	0.324033	DNM3	Homo sapiens dynamin 3 (DNM3), transcript variant 2, mRNA.	26052	chr1	172181617	172181677
A_14_P118422	0.0261198	0.00252442	up	1.14794	1.14794	0.199053	DNTTIP2	Homo sapiens deoxynucleotidyltransferase, terminal, interacting protein 2 (DNTTIP2), mRNA.	30836	chr1	94342533	94342593
A_16_P35245681	0.0176383	0.0013012	up	1.27089	1.27089	0.345835	DPH5	Homo sapiens DPH5 homolog (S. cerevisiae) (DPH5), transcript variant 1, mRNA.	51611	chr1	101466983	101467043
A_16_P35349334	0.00819132	0.00034565	up	1.13224	1.13224	0.179185	DPT	Homo sapiens dermatopontin (DPT), mRNA.	1805	chr1	168679155	168679215
A_16_P15226711	0.0119295	0.000663939	down	1.09015	-1.09015	-0.124521	DPYD	Homo sapiens dihydropyrimidine dehydrogenase (DPYD), transcript variant 1, mRNA.	1806	chr1	97743587	97743647
A_16_P35236541	0.0371031	0.00452501	down	1.1198	-1.1198	-0.163237	DPYD	Homo sapiens dihydropyrimidine dehydrogenase (DPYD), transcript variant 1, mRNA.	1806	chr1	97793764	97793824
A_16_P00128805	0.0433107	0.0058633	down	1.08017	-1.08017	-0.11126	DPYD	Homo sapiens dihydropyrimidine dehydrogenase (DPYD), transcript variant 1, mRNA.	1806	chr1	97570959	97571019
A_16_P15228344	0.0110621	0.000584017	down	1.12832	-1.12832	-0.174175	DPYD	Homo sapiens dihydropyrimidine dehydrogenase (DPYD), transcript variant 1, mRNA.	1806	chr1	98329549	98329609
A_16_P15226626	0.00551857	0.000170046	down	1.11357	-1.11357	-0.155193	DPYD	Homo sapiens dihydropyrimidine dehydrogenase (DPYD), transcript variant 1, mRNA.	1806	chr1	97711008	97711068
A_16_P35236067	0.0186711	0.00143354	down	1.10754	-1.10754	-0.147357	DPYD	Homo sapiens dihydropyrimidine dehydrogenase (DPYD), transcript variant 1, mRNA.	1806	chr1	97608962	97609022
A_16_P15228233	0.0028443	5.06135e-05	down	1.1191	-1.1191	-0.162343	DPYD	Homo sapiens dihydropyrimidine dehydrogenase (DPYD), transcript variant 1, mRNA.	1806	chr1	98291911	98291971
A_16_P15227855	0.00119575	9.14633e-06	down	1.13296	-1.13296	-0.180094	DPYD	Homo sapiens dihydropyrimidine dehydrogenase (DPYD), transcript variant 1, mRNA.	1806	chr1	98165078	98165138
A_16_P35236215	0.0155433	0.00104363	down	1.10497	-1.10497	-0.144001	DPYD	Homo sapiens dihydropyrimidine dehydrogenase (DPYD), transcript variant 1, mRNA.	1806	chr1	97665735	97665795
A_16_P35237345	0.0142069	0.000899058	down	1.10647	-1.10647	-0.145962	DPYD	Homo sapiens dihydropyrimidine dehydrogenase (DPYD), transcript variant 1, mRNA.	1806	chr1	98088429	98088489
A_16_P35236883	0.012114	0.000681097	down	1.12521	-1.12521	-0.170193	DPYD	Homo sapiens dihydropyrimidine dehydrogenase (DPYD), transcript variant 1, mRNA.	1806	chr1	97931807	97931867
A_16_P00129781	0.0406627	0.00526743	down	1.0923	-1.0923	-0.127375	DPYD	Homo sapiens dihydropyrimidine dehydrogenase (DPYD), transcript variant 1, mRNA.	1806	chr1	98159434	98159494
A_16_P00129503	0.0200468	0.00161638	down	1.11061	-1.11061	-0.151351	DPYD	Homo sapiens dihydropyrimidine dehydrogenase (DPYD), transcript variant 1, mRNA.	1806	chr1	98015257	98015317
A_16_P15226446	0.00517748	0.000152044	down	1.13841	-1.13841	-0.18702	DPYD	Homo sapiens dihydropyrimidine dehydrogenase (DPYD), transcript variant 1, mRNA.	1806	chr1	97645694	97645754
A_16_P15227524	0.00993265	0.000487087	down	1.09732	-1.09732	-0.133982	DPYD	Homo sapiens dihydropyrimidine dehydrogenase (DPYD), transcript variant 1, mRNA.	1806	chr1	98059567	98059627
A_16_P15226376	0.0406627	0.00526743	down	1.09268	-1.09268	-0.127867	DPYD	Homo sapiens dihydropyrimidine dehydrogenase (DPYD), transcript variant 1, mRNA.	1806	chr1	97618435	97618495
A_16_P15227436	0.0209055	0.00173615	down	1.15667	-1.15667	-0.209979	DPYD	Homo sapiens dihydropyrimidine dehydrogenase (DPYD), transcript variant 1, mRNA.	1806	chr1	98031441	98031501
A_16_P15227765	0.00908792	0.000416169	down	1.09953	-1.09953	-0.136886	DPYD	Homo sapiens dihydropyrimidine dehydrogenase (DPYD), transcript variant 1, mRNA.	1806	chr1	98134198	98134258
A_14_P201296	0.00280214	4.9125e-05	down	1.13266	-1.13266	-0.179712	DPYD	Homo sapiens dihydropyrimidine dehydrogenase (DPYD), transcript variant 1, mRNA.	1806	chr1	98186018	98186078
A_16_P15227042	0.0217786	0.00186404	up	1.09546	1.09546	0.131542	DPYD	Homo sapiens dihydropyrimidine dehydrogenase (DPYD), transcript variant 1, mRNA.	1806	chr1	97883260	97883320
A_16_P15228187	0.00322769	6.41579e-05	down	1.11904	-1.11904	-0.162267	DPYD	Homo sapiens dihydropyrimidine dehydrogenase (DPYD), transcript variant 1, mRNA.	1806	chr1	98277096	98277156
A_16_P00129636	0.0214998	0.00182048	down	1.0995	-1.0995	-0.136846	DPYD	Homo sapiens dihydropyrimidine dehydrogenase (DPYD), transcript variant 1, mRNA.	1806	chr1	98081367	98081427
A_16_P15227956	0.030343	0.00324347	down	1.06624	-1.06624	-0.0925302	DPYD	Homo sapiens dihydropyrimidine dehydrogenase (DPYD), transcript variant 1, mRNA.	1806	chr1	98198924	98198984
A_16_P15226526	0.0401437	0.00515504	down	1.07119	-1.07119	-0.0992086	DPYD	Homo sapiens dihydropyrimidine dehydrogenase (DPYD), transcript variant 1, mRNA.	1806	chr1	97674922	97674982
A_16_P35236044	0.0236999	0.00214613	down	1.09987	-1.09987	-0.137328	DPYD	Homo sapiens dihydropyrimidine dehydrogenase (DPYD), transcript variant 1, mRNA.	1806	chr1	97602496	97602556
A_16_P15228429	0.0250427	0.00235539	down	1.06736	-1.06736	-0.094043	DPYD	Homo sapiens dihydropyrimidine dehydrogenase (DPYD), transcript variant 1, mRNA.	1806	chr1	98359162	98359222
A_16_P15226566	0.00748636	0.000294269	down	1.16227	-1.16227	-0.216943	DPYD	Homo sapiens dihydropyrimidine dehydrogenase (DPYD), transcript variant 1, mRNA.	1806	chr1	97689468	97689528
A_16_P15227497	0.00936608	0.00043866	down	1.18123	-1.18123	-0.240291	DPYD	Homo sapiens dihydropyrimidine dehydrogenase (DPYD), transcript variant 1, mRNA.	1806	chr1	98050701	98050761
A_14_P120283	0.0316176	0.00346964	down	1.09674	-1.09674	-0.13322	DRAM2	Homo sapiens DNA-damage regulated autophagy modulator 2 (DRAM2), mRNA.		chr1	111674079	111674139
A_16_P15420483	0.00949395	0.000450327	up	1.13344	1.13344	0.180709	DSTYK	Homo sapiens dual serine/threonine and tyrosine protein kinase (DSTYK), transcript variant 1, mRNA.		chr1	205147365	205147425
A_14_P109525	0.0257585	0.00246688	down	1.08887	-1.08887	-0.122831	DYRK3	Homo sapiens dual-specificity tyrosine-(Y)-phosphorylation regulated kinase 3 (DYRK3), transcript variant 2, mRNA.	8444	chr1	206822366	206822426
A_16_P00029948	0.00542561	0.000165367	up	1.10334	1.10334	0.141875	E2F2	Homo sapiens E2F transcription factor 2 (E2F2), mRNA.	1870	chr1	23835242	23835295
A_16_P00054483	0.0106111	0.000540462	up	1.14268	1.14268	0.192416	EBNA1BP2	Homo sapiens EBNA1 binding protein 2 (EBNA1BP2), transcript variant 2, mRNA.	10969	chr1	43636809	43636869
A_16_P15495105	0.0148657	0.000968848	up	1.17602	1.17602	0.233912	EDARADD	Homo sapiens EDAR-associated death domain (EDARADD), transcript variant A, mRNA.	128178	chr1	236562326	236562386
A_16_P15371489	0.0133989	0.00081324	up	1.15289	1.15289	0.205249	EDEM3	Homo sapiens ER degradation enhancer, mannosidase alpha-like 3 (EDEM3), mRNA.	80267	chr1	184700417	184700477
A_16_P00081650	0.00074053	3.50574e-06	down	1.16599	-1.16599	-0.221561	EFCAB7	Homo sapiens EF-hand calcium binding domain 7 (EFCAB7), mRNA.	84455	chr1	64011591	64011651
A_16_P35154797	0.00473557	0.000128373	down	1.12017	-1.12017	-0.163714	EFCAB7	Homo sapiens EF-hand calcium binding domain 7 (EFCAB7), mRNA.	84455	chr1	64034159	64034219
A_16_P35154699	0.0171518	0.00123935	down	1.0812	-1.0812	-0.112635	EFCAB7	Homo sapiens EF-hand calcium binding domain 7 (EFCAB7), mRNA.	84455	chr1	63999097	63999157
A_14_P125729	0.0406627	0.00526743	down	1.12572	-1.12572	-0.170847	EFHD2	Homo sapiens EF-hand domain family, member D2 (EFHD2), mRNA.	79180	chr1	15755319	15755378
A_14_P108832	0.00770608	0.000310543	up	1.14142	1.14142	0.190825	EFNA1	Homo sapiens ephrin-A1 (EFNA1), transcript variant 1, mRNA.	1942	chr1	155105922	155105978
A_14_P122370	0.0438892	0.00598953	up	1.08092	1.08092	0.112263	EFNA1	Homo sapiens ephrin-A1 (EFNA1), transcript variant 1, mRNA.	1942	chr1	155102459	155102519
A_14_P127226	0.0417366	0.00549888	up	1.06652	1.06652	0.0929108	EIF2B3	Homo sapiens eukaryotic translation initiation factor 2B, subunit 3 gamma, 58kDa (EIF2B3), transcript variant 1, mRNA.	8891	chr1	45350423	45350479
A_14_P128496	0.0462323	0.00651927	down	1.05209	-1.05209	-0.0732544	EIF2B3	Homo sapiens eukaryotic translation initiation factor 2B, subunit 3 gamma, 58kDa (EIF2B3), transcript variant 1, mRNA.	8891	chr1	45407174	45407225
A_16_P15083967	0.0169113	0.00120946	up	1.17303	1.17303	0.230237	EIF2C3	Homo sapiens eukaryotic translation initiation factor 2C, 3 (EIF2C3), transcript variant 1, mRNA.	192669	chr1	36399817	36399877
A_16_P35054078	0.012114	0.000681097	up	1.1993	1.1993	0.262194	EIF4G3	Homo sapiens eukaryotic translation initiation factor 4 gamma, 3 (EIF4G3), mRNA.	8672	chr1	21328052	21328112
A_16_P15051362	0.0486394	0.00709079	up	1.11027	1.11027	0.150908	EIF4G3	Homo sapiens eukaryotic translation initiation factor 4 gamma, 3 (EIF4G3), mRNA.	8672	chr1	21493659	21493719
A_16_P15051196	0.0130419	0.000773242	up	1.21326	1.21326	0.278883	EIF4G3	Homo sapiens eukaryotic translation initiation factor 4 gamma, 3 (EIF4G3), mRNA.	8672	chr1	21417009	21417069
A_16_P15050946	0.0171518	0.00123935	down	1.11508	-1.11508	-0.15715	EIF4G3	Homo sapiens eukaryotic translation initiation factor 4 gamma, 3 (EIF4G3), mRNA.	8672	chr1	21317409	21317469
A_16_P15050672	0.0361183	0.00433104	up	1.09275	1.09275	0.127958	EIF4G3	Homo sapiens eukaryotic translation initiation factor 4 gamma, 3 (EIF4G3), mRNA.	8672	chr1	21214972	21215032
A_14_P120888	0.00502757	0.000143731	down	1.13847	-1.13847	-0.1871	ELAVL4	Homo sapiens ELAV (embryonic lethal, abnormal vision, Drosophila)-like 4 (Hu antigen D) (ELAVL4), transcript variant 5, mRNA.	1996	chr1	50666938	50666998
A_16_P15115093	0.0417366	0.00549888	down	1.06817	-1.06817	-0.0951441	ELAVL4	Homo sapiens ELAV (embryonic lethal, abnormal vision, Drosophila)-like 4 (Hu antigen D) (ELAVL4), transcript variant 5, mRNA.	1996	chr1	50518536	50518596
A_16_P15115146	0.0236999	0.00214613	down	1.11826	-1.11826	-0.161256	ELAVL4	Homo sapiens ELAV (embryonic lethal, abnormal vision, Drosophila)-like 4 (Hu antigen D) (ELAVL4), transcript variant 5, mRNA.	1996	chr1	50539535	50539595
A_16_P15115433	0.0433107	0.0058633	up	1.1315	1.1315	0.178232	ELAVL4	Homo sapiens ELAV (embryonic lethal, abnormal vision, Drosophila)-like 4 (Hu antigen D) (ELAVL4), transcript variant 5, mRNA.	1996	chr1	50630754	50630814
A_16_P15182912	0.000391105	7.58931e-07	down	1.1642	-1.1642	-0.21934	ELTD1	Homo sapiens EGF, latrophilin and seven transmembrane domain containing 1 (ELTD1), mRNA.	64123	chr1	79420718	79420778
A_16_P15182857	0.0474384	0.00679964	up	1.07573	1.07573	0.105313	ELTD1	Homo sapiens EGF, latrophilin and seven transmembrane domain containing 1 (ELTD1), mRNA.	64123	chr1	79403570	79403630
A_16_P15068411	0.010101	0.000499949	down	1.51718	-1.51718	-0.601397	EPB41	Homo sapiens erythrocyte membrane protein band 4.1 (elliptocytosis 1, RH-linked) (EPB41), transcript variant 1, mRNA.	2035	chr1	29259968	29260028
A_14_P109701	0.00201138	2.51763e-05	up	1.1533	1.1533	0.205771	EPB41	Homo sapiens erythrocyte membrane protein band 4.1 (elliptocytosis 1, RH-linked) (EPB41), transcript variant 1, mRNA.	2035	chr1	29443549	29443609
A_14_P117342	0.0107525	0.000554632	down	1.12601	-1.12601	-0.171224	EPB41	Homo sapiens erythrocyte membrane protein band 4.1 (elliptocytosis 1, RH-linked) (EPB41), transcript variant 1, mRNA.	2035	chr1	29386908	29386968
A_16_P15088355	0.0328606	0.00371007	up	1.13869	1.13869	0.187377	EPHA10	Homo sapiens EPH receptor A10 (EPHA10), transcript variant 3, mRNA.	284656	chr1	38190334	38190390
A_14_P109970	0.0283729	0.00289619	down	1.07204	-1.07204	-0.100363	EPHB2	Homo sapiens EPH receptor B2 (EPHB2), transcript variant 2, mRNA.	2048	chr1	23199545	23199605
A_16_P35223999	0.0412187	0.00538204	up	1.09413	1.09413	0.129789	EPHX4	Homo sapiens epoxide hydrolase 4 (EPHX4), mRNA.		chr1	92515834	92515894
A_14_P126747	0.00297562	5.53396e-05	up	1.14719	1.14719	0.198108	EPRS	Homo sapiens glutamyl-prolyl-tRNA synthetase (EPRS), mRNA.	2058	chr1	220170633	220170692
A_14_P104006	0.00517748	0.000152044	down	1.10525	-1.10525	-0.144374	EPS15	Homo sapiens epidermal growth factor receptor pathway substrate 15 (EPS15), transcript variant 1, mRNA.	2060	chr1	51937341	51937401
A_16_P15118168	0.0492988	0.00724052	down	1.07813	-1.07813	-0.108537	EPS15	Homo sapiens epidermal growth factor receptor pathway substrate 15 (EPS15), transcript variant 1, mRNA.	2060	chr1	51953352	51953412
A_16_P15118188	0.0166851	0.00118023	up	1.12818	1.12818	0.173994	EPS15	Homo sapiens epidermal growth factor receptor pathway substrate 15 (EPS15), transcript variant 1, mRNA.	2060	chr1	51962052	51962112
A_14_P118987	0.0148657	0.000968848	down	1.08457	-1.08457	-0.117128	EPS8L3	Homo sapiens EPS8-like 3 (EPS8L3), transcript variant 3, mRNA.	79574	chr1	110299298	110299358
A_16_P00055966	0.0223882	0.00195404	up	1.07738	1.07738	0.107526	ERI3	Homo sapiens ERI1 exoribonuclease family member 3 (ERI3), mRNA.		chr1	44721201	44721261
A_16_P00056166	0.0342432	0.00396555	up	1.11689	1.11689	0.159485	ERI3	Homo sapiens ERI1 exoribonuclease family member 3 (ERI3), mRNA.		chr1	44819085	44819145
A_16_P35109415	0.0480379	0.00694384	up	1.08965	1.08965	0.123867	ERI3	Homo sapiens ERI1 exoribonuclease family member 3 (ERI3), mRNA.		chr1	44746819	44746879
A_14_P135973	0.00843639	0.000364565	up	1.07363	1.07363	0.102502	ERO1LB	Homo sapiens ERO1-like beta (S. cerevisiae) (ERO1LB), mRNA.	56605	chr1	236389690	236389750
A_16_P15019842	0.023028	0.00204802	up	1.13271	1.13271	0.179773	ERRFI1	Homo sapiens ERBB receptor feedback inhibitor 1 (ERRFI1), mRNA.	54206	chr1	8073186	8073246
A_16_P35468524	0.0107525	0.000554632	up	1.20438	1.20438	0.268296	ESRRG	Homo sapiens estrogen-related receptor gamma (ESRRG), transcript variant 2, mRNA.	2104	chr1	217249009	217249069
A_16_P15448597	0.0456356	0.00638302	up	1.15295	1.15295	0.205331	ESRRG	Homo sapiens estrogen-related receptor gamma (ESRRG), transcript variant 2, mRNA.	2104	chr1	216903773	216903833
A_16_P15448750	0.0468282	0.00665813	up	1.11618	1.11618	0.15857	ESRRG	Homo sapiens estrogen-related receptor gamma (ESRRG), transcript variant 2, mRNA.	2104	chr1	216951200	216951260
A_16_P15448539	0.0438892	0.00598953	down	1.09899	-1.09899	-0.136182	ESRRG	Homo sapiens estrogen-related receptor gamma (ESRRG), transcript variant 1, mRNA.	2104	chr1	216888146	216888206
A_16_P00254984	0.0295122	0.00310024	down	1.10803	-1.10803	-0.147995	ESRRG	Homo sapiens estrogen-related receptor gamma (ESRRG), transcript variant 1, mRNA.	2104	chr1	216864867	216864927
A_14_P134934	0.00819132	0.00034565	up	1.14143	1.14143	0.190844	ETV3	Homo sapiens ets variant 3 (ETV3), transcript variant 1, mRNA.	2117	chr1	157095460	157095507
A_16_P00171204	0.0272173	0.00270447	up	1.16605	1.16605	0.221633	ETV3L	Homo sapiens ets variant 3-like (ETV3L), mRNA.	440695	chr1	157062152	157062212
A_16_P15215769	0.0342432	0.00396555	down	1.092	-1.092	-0.126976	EVI5	Homo sapiens ecotropic viral integration site 5 (EVI5), mRNA.	7813	chr1	93018435	93018495
A_14_P139002	0.010101	0.000499949	down	1.09966	-1.09966	-0.137057	EVI5	Homo sapiens ecotropic viral integration site 5 (EVI5), mRNA.	7813	chr1	92975589	92975649
A_16_P15216096	0.00979613	0.000474534	down	1.15687	-1.15687	-0.210228	EVI5	Homo sapiens ecotropic viral integration site 5 (EVI5), mRNA.	7813	chr1	93180988	93181048
A_16_P00122531	0.00831134	0.00035499	up	1.14076	1.14076	0.189992	EVI5	Homo sapiens ecotropic viral integration site 5 (EVI5), mRNA.	7813	chr1	93011605	93011665
A_16_P00122523	0.0417366	0.00549888	down	1.08718	-1.08718	-0.120585	EVI5	Homo sapiens ecotropic viral integration site 5 (EVI5), mRNA.	7813	chr1	93002720	93002780
A_16_P15215957	0.000231368	1.55783e-07	down	1.15474	-1.15474	-0.207568	EVI5	Homo sapiens ecotropic viral integration site 5 (EVI5), mRNA.	7813	chr1	93111618	93111678
A_14_P118453	0.00133356	1.14608e-05	down	1.13137	-1.13137	-0.178065	EVI5	Homo sapiens ecotropic viral integration site 5 (EVI5), mRNA.	7813	chr1	93257894	93257948
A_16_P15216068	0.00560299	0.00017485	up	1.16859	1.16859	0.224767	EVI5	Homo sapiens ecotropic viral integration site 5 (EVI5), mRNA.	7813	chr1	93170141	93170200
A_16_P15216024	0.00271983	4.62715e-05	down	1.12411	-1.12411	-0.168779	EVI5	Homo sapiens ecotropic viral integration site 5 (EVI5), mRNA.	7813	chr1	93155356	93155416
A_16_P15216181	0.0155433	0.00104363	down	1.11927	-1.11927	-0.162555	EVI5	Homo sapiens ecotropic viral integration site 5 (EVI5), mRNA.	7813	chr1	93230033	93230093
A_14_P111529	0.0108926	0.000569148	up	1.21609	1.21609	0.282251	EXOC8	Homo sapiens exocyst complex component 8 (EXOC8), mRNA.	149371	chr1	231469637	231469697
A_16_P00035176	0.00416859	0.000102177	up	1.16258	1.16258	0.21733	EYA3	Homo sapiens eyes absent homolog 3 (Drosophila) (EYA3), mRNA.	2140	chr1	28302530	28302590
A_14_P102418	0.00831134	0.00035499	down	1.15052	-1.15052	-0.202287	F13B	Homo sapiens coagulation factor XIII, B polypeptide (F13B), mRNA.	2165	chr1	197024869	197024929
A_16_P00125218	0.00672488	0.000243384	down	1.12882	-1.12882	-0.17482	F3	Homo sapiens coagulation factor III (thromboplastin, tissue factor) (F3), mRNA.	2152	chr1	95005865	95005925
A_16_P00188356	0.0264735	0.00258318	up	1.1129	1.1129	0.154322	F5	Homo sapiens coagulation factor V (proaccelerin, labile factor) (F5), mRNA.	2153	chr1	169527365	169527425
A_14_P138806	0.00856655	0.000374381	down	1.09479	-1.09479	-0.130661	FAF1	Homo sapiens Fas (TNFRSF6) associated factor 1 (FAF1), mRNA.	11124	chr1	51368913	51368973
A_16_P35123280	0.0150913	0.000993204	down	1.08923	-1.08923	-0.123313	FAF1	Homo sapiens Fas (TNFRSF6) associated factor 1 (FAF1), mRNA.	11124	chr1	51044748	51044808
A_16_P15117024	0.0474384	0.00679964	down	1.07784	-1.07784	-0.108147	FAF1	Homo sapiens Fas (TNFRSF6) associated factor 1 (FAF1), mRNA.	11124	chr1	51323151	51323211
A_16_P15116270	0.00404177	9.64654e-05	up	1.21669	1.21669	0.282957	FAF1	Homo sapiens Fas (TNFRSF6) associated factor 1 (FAF1), mRNA.	11124	chr1	50987413	50987473
A_16_P35123807	0.00334511	6.80448e-05	down	1.10147	-1.10147	-0.139428	FAF1	Homo sapiens Fas (TNFRSF6) associated factor 1 (FAF1), mRNA.	11124	chr1	51290090	51290150
A_14_P124376	0.0316176	0.00346964	down	1.07706	-1.07706	-0.107101	FAF1	Homo sapiens Fas (TNFRSF6) associated factor 1 (FAF1), mRNA.	11124	chr1	51050432	51050492
A_14_P137530	0.0342432	0.00396555	down	1.06607	-1.06607	-0.0922961	FAF1	Homo sapiens Fas (TNFRSF6) associated factor 1 (FAF1), mRNA.	11124	chr1	51204583	51204643
A_16_P15117030	0.0214998	0.00182048	down	1.06152	-1.06152	-0.0861286	FAF1	Homo sapiens Fas (TNFRSF6) associated factor 1 (FAF1), mRNA.	11124	chr1	51335526	51335586
A_14_P115527	0.00156718	1.57559e-05	up	1.13267	1.13267	0.179733	FAM129A	Homo sapiens family with sequence similarity 129, member A (FAM129A), transcript variant 2, mRNA.	116496	chr1	184801051	184801111
A_16_P15371706	0.0250427	0.00235539	down	1.10943	-1.10943	-0.149817	FAM129A	Homo sapiens family with sequence similarity 129, member A (FAM129A), transcript variant 2, mRNA.	116496	chr1	184788565	184788625
A_16_P00209756	0.00179597	2.02568e-05	up	1.27276	1.27276	0.347957	FAM129A	Homo sapiens family with sequence similarity 129, member A (FAM129A), transcript variant 2, mRNA.	116496	chr1	184941762	184941822
A_16_P35375225	0.00297562	5.53396e-05	up	1.17449	1.17449	0.232029	FAM163A	Homo sapiens family with sequence similarity 163, member A (FAM163A), mRNA.	148753	chr1	179730740	179730800
A_16_P00202079	0.0075986	0.000302303	up	1.17086	1.17086	0.227568	FAM163A	Homo sapiens family with sequence similarity 163, member A (FAM163A), mRNA.	148753	chr1	179715043	179715103
A_16_P00263218	0.023028	0.00204802	up	1.18832	1.18832	0.248923	FAM177B	Homo sapiens family with sequence similarity 177, member B (FAM177B), mRNA.		chr1	222923238	222923298
A_14_P201424	0.00586947	0.000190039	down	1.14566	-1.14566	-0.196178	FAM19A3	Homo sapiens family with sequence similarity 19 (chemokine (C-C motif)-like), member A3 (FAM19A3), transcript variant 2, mRNA.	284467	chr1	113268037	113268097
A_16_P15357813	0.0371031	0.00452501	up	1.1168	1.1168	0.159366	FAM20B	Homo sapiens family with sequence similarity 20, member B (FAM20B), mRNA.	9917	chr1	179023753	179023813
A_16_P35001586	0.0217786	0.00186404	down	1.12519	-1.12519	-0.170171	FAM41C	Homo sapiens family with sequence similarity 41, member C (FAM41C), non-coding RNA.	284593	chr1	811041	811086
A_16_P15384906	0.0401437	0.00515504	up	1.15011	1.15011	0.201778	FAM5C	Homo sapiens family with sequence similarity 5, member C (FAM5C), mRNA.	339479	chr1	190387848	190387908
A_16_P15384806	0.0474384	0.00679964	down	1.10014	-1.10014	-0.137693	FAM5C	Homo sapiens family with sequence similarity 5, member C (FAM5C), mRNA.	339479	chr1	190352465	190352525
A_16_P00216889	0.0206135	0.00169535	up	1.18345	1.18345	0.242997	FAM5C	Homo sapiens family with sequence similarity 5, member C (FAM5C), mRNA.	339479	chr1	190072696	190072756
A_16_P00217441	0.00770608	0.000310543	up	1.19873	1.19873	0.261502	FAM5C	Homo sapiens family with sequence similarity 5, member C (FAM5C), mRNA.	339479	chr1	190409767	190409827
A_14_P136363	0.0189459	0.00146851	up	1.0735	1.0735	0.102321	FAM5C	Homo sapiens family with sequence similarity 5, member C (FAM5C), mRNA.	339479	chr1	190319493	190319553
A_14_P130500	0.0486394	0.00709079	down	1.08083	-1.08083	-0.112133	FAM63A	Homo sapiens family with sequence similarity 63, member A (FAM63A), transcript variant 4, mRNA.	55793	chr1	150978753	150978813
A_16_P15180364	0.0189459	0.00146851	down	1.12393	-1.12393	-0.168547	FAM73A	Homo sapiens family with sequence similarity 73, member A (FAM73A), mRNA.	374986	chr1	78316230	78316290
A_14_P107298	0.0428059	0.00573948	down	1.06446	-1.06446	-0.0901242	FAM76A	Homo sapiens family with sequence similarity 76, member A (FAM76A), transcript variant 1, mRNA.	199870	chr1	28088102	28088162
A_16_P00183575	0.0406627	0.00526743	up	1.1013	1.1013	0.139208	FAM78B	Homo sapiens family with sequence similarity 78, member B (FAM78B), mRNA.	149297	chr1	166091763	166091823
A_14_P137420	0.0200468	0.00161638	down	1.07408	-1.07408	-0.103101	FCRL4	Homo sapiens Fc receptor-like 4 (FCRL4), mRNA.	83417	chr1	157551059	157551119
A_14_P137646	0.0346805	0.0040542	down	1.09149	-1.09149	-0.126295	FCRLA	Homo sapiens Fc receptor-like A (FCRLA), mRNA.	84824	chr1	161676981	161677036
A_16_P15137336	0.0386297	0.00483074	down	1.08675	-1.08675	-0.120022	FGGY	Homo sapiens FGGY carbohydrate kinase domain containing (FGGY), transcript variant 1, mRNA.	55277	chr1	60052415	60052475
A_14_P112779	0.00231935	3.42108e-05	up	1.24398	1.24398	0.314961	FGGY	Homo sapiens FGGY carbohydrate kinase domain containing (FGGY), transcript variant 1, mRNA.	55277	chr1	60168147	60168207
A_16_P00075950	0.0291367	0.00303081	down	1.10505	-1.10505	-0.144105	FGGY	Homo sapiens FGGY carbohydrate kinase domain containing (FGGY), transcript variant 1, mRNA.	55277	chr1	60065955	60066014
A_14_P133373	0.0462323	0.00651927	down	1.05629	-1.05629	-0.0790086	FGGY	Homo sapiens FGGY carbohydrate kinase domain containing (FGGY), transcript variant 1, mRNA.	55277	chr1	59787179	59787234
A_14_P136571	0.000338993	5.10369e-07	down	1.12614	-1.12614	-0.171389	FGGY	Homo sapiens FGGY carbohydrate kinase domain containing (FGGY), transcript variant 1, mRNA.	55277	chr1	59848245	59848305
A_16_P15136920	0.00480856	0.000132061	down	1.09411	-1.09411	-0.129755	FGGY	Homo sapiens FGGY carbohydrate kinase domain containing (FGGY), transcript variant 1, mRNA.	55277	chr1	59874074	59874134
A_16_P15137704	0.0211963	0.00177786	up	1.22521	1.22521	0.293033	FGGY	Homo sapiens FGGY carbohydrate kinase domain containing (FGGY), transcript variant 1, mRNA.	55277	chr1	60215902	60215962
A_16_P00075937	0.00301972	5.70058e-05	up	1.17612	1.17612	0.234036	FGGY	Homo sapiens FGGY carbohydrate kinase domain containing (FGGY), transcript variant 1, mRNA.	55277	chr1	60059701	60059761
A_16_P35144940	0.0291367	0.00303081	up	1.12276	1.12276	0.167056	FGGY	Homo sapiens FGGY carbohydrate kinase domain containing (FGGY), transcript variant 1, mRNA.	55277	chr1	60046356	60046416
A_16_P35039461	0.0450598	0.00624935	up	1.09449	1.09449	0.13026	FHAD1	Homo sapiens forkhead-associated (FHA) phosphopeptide binding domain 1 (FHAD1), mRNA.	114827	chr1	15711762	15711822
A_14_P122449	0.00831134	0.00035499	down	1.25326	-1.25326	-0.325689	FLAD1	Homo sapiens FAD1 flavin adenine dinucleotide synthetase homolog (S. cerevisiae) (FLAD1), transcript variant 1, mRNA.	80308	chr1	154965258	154965304
A_16_P15504464	0.0366139	0.00442706	up	1.1812	1.1812	0.240255	FMN2	Homo sapiens formin 2 (FMN2), mRNA.	56776	chr1	240263292	240263352
A_14_P130322	0.0287592	0.00296281	up	1.14786	1.14786	0.198947	FMO3	Homo sapiens flavin containing monooxygenase 3 (FMO3), transcript variant 2, mRNA.	2328	chr1	171085188	171085248
A_16_P15340194	0.0324585	0.00362829	up	1.13533	1.13533	0.183105	FMO4	Homo sapiens flavin containing monooxygenase 4 (FMO4), mRNA.	2329	chr1	171303760	171303820
A_16_P15217585	0.0150913	0.000993204	down	1.09435	-1.09435	-0.130081	FNBP1L	Homo sapiens formin binding protein 1-like (FNBP1L), transcript variant 1, mRNA.	54874	chr1	93946982	93947042
A_14_P130025	0.00517748	0.000152044	down	1.13373	-1.13373	-0.181081	FNBP1L	Homo sapiens formin binding protein 1-like (FNBP1L), transcript variant 1, mRNA.	54874	chr1	93998555	93998615
A_14_P120288	0.0157533	0.00106972	down	1.10124	-1.10124	-0.139132	FNBP1L	Homo sapiens formin binding protein 1-like (FNBP1L), transcript variant 1, mRNA.	54874	chr1	93966722	93966782
A_14_P108121	0.00643374	0.000224211	down	1.07895	-1.07895	-0.109626	FOXD2	Homo sapiens forkhead box D2 (FOXD2), mRNA.	2306	chr1	47901741	47901786
A_16_P15098838	0.00882591	0.000394759	up	1.16337	1.16337	0.218313	FOXJ3	Homo sapiens forkhead box J3 (FOXJ3), mRNA.	22887	chr1	42793162	42793222
A_16_P15232975	0.00882591	0.000394759	down	1.11083	-1.11083	-0.151642	FRRS1	Homo sapiens ferric-chelate reductase 1 (FRRS1), mRNA.	391059	chr1	100221037	100221097
A_16_P15232968	0.00334511	6.80448e-05	up	1.18061	1.18061	0.239533	FRRS1	Homo sapiens ferric-chelate reductase 1 (FRRS1), mRNA.	391059	chr1	100214377	100214437
A_16_P00101813	0.00993265	0.000487087	down	1.11157	-1.11157	-0.152604	FUBP1	Homo sapiens far upstream element (FUSE) binding protein 1 (FUBP1), mRNA.	8880	chr1	78422232	78422292
A_16_P15293333	0.0433107	0.0058633	up	1.15934	1.15934	0.213309	GABPB2	Homo sapiens GA binding protein transcription factor, beta subunit 2 (GABPB2), mRNA.	2553	chr1	151090871	151090931
A_14_P113109	0.0184213	0.00139934	down	1.09989	-1.09989	-0.137354	GADD45A	Homo sapiens growth arrest and DNA-damage-inducible, alpha (GADD45A), mRNA.	1647	chr1	68152834	68152894
A_16_P15479921	0.0150913	0.000993204	up	1.16556	1.16556	0.221019	GALNT2	Homo sapiens UDP-N-acetyl-alpha-D-galactosamine:polypeptide N-acetylgalactosaminyltransferase 2 (GalNAc-T2) (GALNT2), mRNA.	2590	chr1	230307226	230307286
A_16_P35499821	0.0157533	0.00106972	up	1.14505	1.14505	0.195412	GALNT2	Homo sapiens UDP-N-acetyl-alpha-D-galactosamine:polypeptide N-acetylgalactosaminyltransferase 2 (GalNAc-T2) (GALNT2), mRNA.	2590	chr1	230340298	230340358
A_14_P127128	0.0126753	0.000735076	down	1.09946	-1.09946	-0.136792	GALNT2	Homo sapiens UDP-N-acetyl-alpha-D-galactosamine:polypeptide N-acetylgalactosaminyltransferase 2 (GalNAc-T2) (GALNT2), mRNA.	2590	chr1	230332200	230332260
A_14_P106047	0.00328675	6.60743e-05	up	1.1563	1.1563	0.209518	GATAD2B	Homo sapiens GATA zinc finger domain containing 2B (GATAD2B), mRNA.	57459	chr1	153780440	153780500
A_14_P134132	0.0020963	2.76157e-05	up	1.15065	1.15065	0.202447	GATAD2B	Homo sapiens GATA zinc finger domain containing 2B (GATAD2B), mRNA.	57459	chr1	153855797	153855857
A_16_P15207989	0.0401437	0.00515504	down	1.08436	-1.08436	-0.116848	GBP1	Homo sapiens guanylate binding protein 1, interferon-inducible, 67kDa (GBP1), mRNA.	2633	chr1	89520145	89520205
A_16_P15208099	0.00254429	4.10294e-05	down	1.10591	-1.10591	-0.145235	GBP2	Homo sapiens guanylate binding protein 2, interferon-inducible (GBP2), mRNA.	2634	chr1	89585956	89586016
A_16_P15207937	0.0333342	0.00379352	up	1.13942	1.13942	0.188302	GBP3	Homo sapiens guanylate binding protein 3 (GBP3), mRNA.	2635	chr1	89481149	89481209
A_16_P15208135	0.00297562	5.53396e-05	down	1.0866	-1.0866	-0.119827	GBP7	Homo sapiens guanylate binding protein 7 (GBP7), mRNA.	388646	chr1	89607619	89607679
A_16_P00156095	0.0220936	0.00190855	down	1.1158	-1.1158	-0.158077	GDAP2	Homo sapiens ganglioside induced differentiation associated protein 2 (GDAP2), transcript variant 1, mRNA.	54834	chr1	118455098	118455158
A_16_P15273851	0.00663109	0.000236828	down	1.13806	-1.13806	-0.186582	GDAP2	Homo sapiens ganglioside induced differentiation associated protein 2 (GDAP2), transcript variant 1, mRNA.	54834	chr1	118449122	118449182
A_14_P115729	0.0192154	0.00150426	down	1.10681	-1.10681	-0.14641	GDAP2	Homo sapiens ganglioside induced differentiation associated protein 2 (GDAP2), transcript variant 1, mRNA.	54834	chr1	118412732	118412792
A_14_P108057	0.0346805	0.0040542	up	1.12666	1.12666	0.172047	GJA5	Homo sapiens gap junction protein, alpha 5, 40kDa (GJA5), transcript variant A, mRNA.	2702	chr1	147236986	147237046
A_16_P00043604	0.0169113	0.00120946	up	1.18863	1.18863	0.249296	GJB3	Homo sapiens gap junction protein, beta 3, 31kDa (GJB3), transcript variant 1, mRNA.	2707	chr1	35251920	35251980
A_16_P00043578	0.0243671	0.00224853	down	1.11693	-1.11693	-0.159539	GJB4	Homo sapiens gap junction protein, beta 4, 30.3kDa (GJB4), mRNA.	127534	chr1	35227865	35227925
A_16_P35224537	0.00450789	0.000117884	up	1.14175	1.14175	0.191245	GLMN	Homo sapiens glomulin, FKBP associated protein (GLMN), mRNA.	11146	chr1	92754648	92754708
A_16_P00144956	0.0107525	0.000554632	down	1.16956	-1.16956	-0.225969	GNAI3	Homo sapiens guanine nucleotide binding protein (G protein), alpha inhibiting activity polypeptide 3 (GNAI3), mRNA.	2773	chr1	110129436	110129496
A_14_P121787	0.0128595	0.000753935	down	1.17045	-1.17045	-0.227067	GNAI3	Homo sapiens guanine nucleotide binding protein (G protein), alpha inhibiting activity polypeptide 3 (GNAI3), mRNA.	2773	chr1	110116507	110116567
A_14_P104089	0.00693312	0.000257003	up	1.17847	1.17847	0.236909	GON4L	Homo sapiens gon-4-like (C. elegans) (GON4L), transcript variant 1, mRNA.	54856	chr1	155823552	155823612
A_14_P124080	0.0186711	0.00143354	up	1.13457	1.13457	0.182147	GPR137B	Homo sapiens G protein-coupled receptor 137B (GPR137B), mRNA.	7107	chr1	236372169	236372229
A_14_P132660	0.0480379	0.00694384	down	1.08791	-1.08791	-0.12156	GPR137B	Homo sapiens G protein-coupled receptor 137B (GPR137B), mRNA.	7107	chr1	236331998	236332057
A_16_P00280135	0.0057769	0.000184844	up	1.15353	1.15353	0.206057	GPR137B	Homo sapiens G protein-coupled receptor 137B (GPR137B), mRNA.	7107	chr1	236310013	236310073
A_16_P15332778	0.0119295	0.000663939	up	1.13396	1.13396	0.18137	GPR161	Homo sapiens G protein-coupled receptor 161 (GPR161), transcript variant 2, mRNA.	23432	chr1	168079326	168079386
A_14_P137347	0.0119295	0.000663939	up	1.15281	1.15281	0.205158	GPR177	Homo sapiens G protein-coupled receptor 177 (GPR177), transcript variant 2, mRNA.	79971	chr1	68632402	68632462
A_14_P120217	0.0342432	0.00396555	up	1.16858	1.16858	0.224758	GPSM2	Homo sapiens G-protein signaling modulator 2 (AGS3-like, C. elegans) (GPSM2), mRNA.	29899	chr1	109445774	109445834
A_16_P00144130	0.0171518	0.00123935	down	1.11056	-1.11056	-0.15129	GPSM2	Homo sapiens G-protein signaling modulator 2 (AGS3-like, C. elegans) (GPSM2), mRNA.	29899	chr1	109465047	109465107
A_14_P132567	0.0275847	0.00276705	up	1.11454	1.11454	0.156448	GPX7	Homo sapiens glutathione peroxidase 7 (GPX7), mRNA.	2882	chr1	53072919	53072979
A_16_P15505727	0.0324585	0.00362829	up	1.14283	1.14283	0.192606	GREM2	Homo sapiens gremlin 2, cysteine knot superfamily, homolog (Xenopus laevis) (GREM2), mRNA.	64388	chr1	240746808	240746868
A_16_P15505577	0.0279629	0.00283095	up	1.18818	1.18818	0.248758	GREM2	Homo sapiens gremlin 2, cysteine knot superfamily, homolog (Xenopus laevis) (GREM2), mRNA.	64388	chr1	240690428	240690488
A_14_P124100	0.0320304	0.00354816	up	1.14903	1.14903	0.200416	GREM2	Homo sapiens gremlin 2, cysteine knot superfamily, homolog (Xenopus laevis) (GREM2), mRNA.	64388	chr1	240755778	240755838
A_16_P15505710	0.0130419	0.000773242	down	1.11309	-1.11309	-0.15457	GREM2	Homo sapiens gremlin 2, cysteine knot superfamily, homolog (Xenopus laevis) (GREM2), mRNA.	64388	chr1	240740380	240740440
A_14_P134519	0.0295122	0.00310024	down	1.08843	-1.08843	-0.122249	GRIK3	Homo sapiens glutamate receptor, ionotropic, kainate 3 (GRIK3), mRNA.	2899	chr1	37485298	37485358
A_14_P120641	0.0291367	0.00303081	up	1.11728	1.11728	0.159985	GRIK3	Homo sapiens glutamate receptor, ionotropic, kainate 3 (GRIK3), mRNA.	2899	chr1	37310358	37310418
A_14_P134983	0.00672488	0.000243384	up	1.117	1.117	0.159632	GSTM5	Homo sapiens glutathione S-transferase mu 5 (GSTM5), mRNA.	2949	chr1	110260815	110260875
A_16_P00011543	0.0328606	0.00371007	down	1.06758	-1.06758	-0.0943445	H6PD	Homo sapiens hexose-6-phosphate dehydrogenase (glucose 1-dehydrogenase) (H6PD), mRNA.	9563	chr1	9321498	9321558
A_16_P00168792	0.0422732	0.00561802	up	1.16805	1.16805	0.224108	HCN3	Homo sapiens hyperpolarization activated cyclic nucleotide-gated potassium channel 3 (HCN3), mRNA.	57657	chr1	155249563	155249623
A_16_P15075936	0.0268252	0.00264319	up	1.13296	1.13296	0.180093	HDAC1	Homo sapiens histone deacetylase 1 (HDAC1), mRNA.	3065	chr1	32775616	32775676
A_16_P00120877	0.016217	0.00112372	down	1.07138	-1.07138	-0.0994762	HFM1	Homo sapiens HFM1, ATP-dependent DNA helicase homolog (S. cerevisiae) (HFM1), mRNA.	164045	chr1	91794887	91794932
A_16_P00120895	0.0312139	0.0033927	down	1.16476	-1.16476	-0.220038	HFM1	Homo sapiens HFM1, ATP-dependent DNA helicase homolog (S. cerevisiae) (HFM1), mRNA.	164045	chr1	91812974	91813034
A_16_P00120872	0.0406627	0.00526743	down	1.15433	-1.15433	-0.207052	HFM1	Homo sapiens HFM1, ATP-dependent DNA helicase homolog (S. cerevisiae) (HFM1), mRNA.	164045	chr1	91788516	91788576
A_16_P35171322	0.0169113	0.00120946	down	1.08952	-1.08952	-0.123693	HHLA3	Homo sapiens HERV-H LTR-associating 3 (HHLA3), transcript variant 1, mRNA.	11147	chr1	70831985	70832045
A_16_P35243414	0.00301972	5.70058e-05	down	1.13652	-1.13652	-0.184627	HIAT1	Homo sapiens hippocampus abundant transcript 1 (HIAT1), mRNA.	64645	chr1	100533481	100533541
A_14_P103960	0.00466429	0.000124782	down	1.21145	-1.21145	-0.276733	HIVEP3	Homo sapiens human immunodeficiency virus type I enhancer binding protein 3 (HIVEP3), transcript variant 2, mRNA.	59269	chr1	42384219	42384279
A_16_P15097329	0.0226946	0.00200052	down	1.07257	-1.07257	-0.101072	HIVEP3	Homo sapiens human immunodeficiency virus type I enhancer binding protein 3 (HIVEP3), transcript variant 2, mRNA.	59269	chr1	42145965	42146021
A_16_P00052927	0.0192154	0.00150426	up	1.09911	1.09911	0.136336	HIVEP3	Homo sapiens human immunodeficiency virus type I enhancer binding protein 3 (HIVEP3), transcript variant 2, mRNA.	59269	chr1	42269544	42269604
A_16_P35390668	0.00133356	1.14608e-05	up	1.33742	1.33742	0.419456	HMCN1	Homo sapiens hemicentin 1 (HMCN1), mRNA.	83872	chr1	185805133	185805193
A_16_P35391291	0.0492988	0.00724052	down	1.09873	-1.09873	-0.135841	HMCN1	Homo sapiens hemicentin 1 (HMCN1), mRNA.	83872	chr1	186011667	186011727
A_16_P15374339	0.00292669	5.37196e-05	up	1.21097	1.21097	0.276167	HMCN1	Homo sapiens hemicentin 1 (HMCN1), mRNA.	83872	chr1	185892726	185892786
A_16_P15374288	0.0057769	0.000184844	up	1.20786	1.20786	0.272453	HMCN1	Homo sapiens hemicentin 1 (HMCN1), mRNA.	83872	chr1	185878511	185878571
A_14_P201826	0.0144184	0.000921786	down	1.08697	-1.08697	-0.120316	HMCN1	Homo sapiens hemicentin 1 (HMCN1), mRNA.	83872	chr1	185962461	185962513
A_16_P15374259	0.00322769	6.41579e-05	up	1.24933	1.24933	0.321154	HMCN1	Homo sapiens hemicentin 1 (HMCN1), mRNA.	83872	chr1	185870901	185870961
A_14_P128700	0.012114	0.000681097	down	1.09244	-1.09244	-0.127559	HOOK1	Homo sapiens hook homolog 1 (Drosophila) (HOOK1), mRNA.	51361	chr1	60325838	60325898
A_16_P35304775	0.0075986	0.000302303	up	1.18264	1.18264	0.242011	HORMAD1	Homo sapiens HORMA domain containing 1 (HORMAD1), mRNA.	84072	chr1	150672539	150672599
A_14_P114946	0.0261198	0.00252442	up	1.09865	1.09865	0.135725	HORMAD1	Homo sapiens HORMA domain containing 1 (HORMAD1), mRNA.	84072	chr1	150680729	150680789
A_14_P200015	0.0433107	0.0058633	up	1.07275	1.07275	0.101317	HPCA	Homo sapiens hippocalcin (HPCA), mRNA.	3208	chr1	33356204	33356251
A_14_P103309	0.00496116	0.000139737	up	1.11154	1.11154	0.152561	HPCAL4	Homo sapiens hippocalcin like 4 (HPCAL4), mRNA.	51440	chr1	40154450	40154508
A_16_P15202704	0.0150913	0.000993204	up	1.07361	1.07361	0.102464	HS2ST1	Homo sapiens heparan sulfate 2-O-sulfotransferase 1 (HS2ST1), transcript variant 2, mRNA.	9653	chr1	87458986	87459046
A_16_P15202773	0.00404177	9.64654e-05	down	1.16215	-1.16215	-0.216799	HS2ST1	Homo sapiens heparan sulfate 2-O-sulfotransferase 1 (HS2ST1), transcript variant 2, mRNA.	9653	chr1	87483682	87483742
A_14_P110977	0.0108926	0.000569148	down	1.48172	-1.48172	-0.567271	HS2ST1	Homo sapiens heparan sulfate 2-O-sulfotransferase 1 (HS2ST1), transcript variant 1, mRNA.	9653	chr1	87573012	87573072
A_16_P15202899	0.0194917	0.00154081	down	1.08651	-1.08651	-0.119707	HS2ST1	Homo sapiens heparan sulfate 2-O-sulfotransferase 1 (HS2ST1), transcript variant 2, mRNA.	9653	chr1	87531644	87531704
A_14_P127732	0.00770608	0.000310543	down	1.13496	-1.13496	-0.182642	HS2ST1	Homo sapiens heparan sulfate 2-O-sulfotransferase 1 (HS2ST1), transcript variant 2, mRNA.	9653	chr1	87540607	87540667
A_16_P15202593	0.00560299	0.00017485	up	1.12343	1.12343	0.167911	HS2ST1	Homo sapiens heparan sulfate 2-O-sulfotransferase 1 (HS2ST1), transcript variant 2, mRNA.	9653	chr1	87406703	87406763
A_14_P121171	0.00717344	0.000271349	down	1.10004	-1.10004	-0.137554	HSD11B1	Homo sapiens hydroxysteroid (11-beta) dehydrogenase 1 (HSD11B1), transcript variant 2, mRNA.	3290	chr1	209908050	209908109
A_16_P00178776	0.0422732	0.00561802	down	1.14797	-1.14797	-0.199083	HSD17B7	Homo sapiens hydroxysteroid (17-beta) dehydrogenase 7 (HSD17B7), mRNA.	51478	chr1	162767171	162767231
A_14_P116683	0.0422732	0.00561802	up	1.16942	1.16942	0.225789	HSPB11	Homo sapiens heat shock protein family B (small), member 11 (HSPB11), mRNA.		chr1	54409663	54409723
A_14_P134082	0.0240504	0.00219678	up	1.09099	1.09099	0.125636	HTR6	Homo sapiens 5-hydroxytryptamine (serotonin) receptor 6 (HTR6), mRNA.	3362	chr1	20003601	20003656
A_16_P00260323	0.00908792	0.000416169	up	1.19809	1.19809	0.260739	IARS2	Homo sapiens isoleucyl-tRNA synthetase 2, mitochondrial (IARS2), nuclear gene encoding mitochondrial protein, mRNA.	55699	chr1	220313509	220313569
A_16_P00023665	0.0166851	0.00118023	down	1.14541	-1.14541	-0.195858	IFFO2	Homo sapiens intermediate filament family orphan 2 (IFFO2), mRNA.		chr1	19237279	19237339
A_16_P00102754	0.0337869	0.00387867	up	1.11415	1.11415	0.15594	IFI44	Homo sapiens interferon-induced protein 44 (IFI44), mRNA.	10561	chr1	79124975	79125035
A_16_P00102749	0.00473557	0.000128373	down	1.164	-1.164	-0.219087	IFI44	Homo sapiens interferon-induced protein 44 (IFI44), mRNA.	10561	chr1	79121140	79121200
A_16_P00022673	0.0283729	0.00289619	down	1.09419	-1.09419	-0.129867	IGSF21	Homo sapiens immunoglobin superfamily, member 21 (IGSF21), mRNA.	84966	chr1	18587504	18587564
A_16_P00022810	0.0295122	0.00310024	down	1.08313	-1.08313	-0.11521	IGSF21	Homo sapiens immunoglobin superfamily, member 21 (IGSF21), mRNA.	84966	chr1	18670631	18670691
A_14_P128637	0.000870084	4.9014e-06	down	1.17047	-1.17047	-0.227087	IGSF3	Homo sapiens immunoglobulin superfamily, member 3 (IGSF3), transcript variant 2, mRNA.	3321	chr1	117207199	117207259
A_16_P00154357	0.0275847	0.00276705	down	1.18497	-1.18497	-0.244852	IGSF3	Homo sapiens immunoglobulin superfamily, member 3 (IGSF3), transcript variant 2, mRNA.	3321	chr1	117175225	117175285
A_16_P00174861	0.0159859	0.00109641	up	1.18709	1.18709	0.247428	IGSF9	Homo sapiens immunoglobulin superfamily, member 9 (IGSF9), transcript variant 1, mRNA.	57549	chr1	159909830	159909890
A_16_P00239804	0.0164415	0.00115165	down	1.14635	-1.14635	-0.197045	IKBKE	Homo sapiens inhibitor of kappa light polypeptide gene enhancer in B-cells, kinase epsilon (IKBKE), mRNA.	9641	chr1	206645681	206645741
A_14_P109657	0.0295122	0.00310024	up	1.1142	1.1142	0.156009	IL20	Homo sapiens interleukin 20 (IL20), mRNA.	50604	chr1	207039640	207039696
A_14_P135991	0.0243671	0.00224853	down	1.06635	-1.06635	-0.0926836	IL23R	Homo sapiens interleukin 23 receptor (IL23R), mRNA.	149233	chr1	67635083	67635143
A_16_P00087037	0.0428059	0.00573948	down	1.06627	-1.06627	-0.0925684	IL23R	Homo sapiens interleukin 23 receptor (IL23R), mRNA.	149233	chr1	67705911	67705971
A_16_P15155800	0.0123084	0.000698666	down	1.07383	-1.07383	-0.102764	IL23R	Homo sapiens interleukin 23 receptor (IL23R), mRNA.	149233	chr1	67648462	67648519
A_16_P15300820	0.0351611	0.00414464	up	1.12174	1.12174	0.165736	IL6R	Homo sapiens interleukin 6 receptor (IL6R), transcript variant 1, mRNA.	3570	chr1	154432330	154432390
A_14_P137954	0.00770608	0.000310543	up	1.11522	1.11522	0.15733	IL6R	Homo sapiens interleukin 6 receptor (IL6R), transcript variant 1, mRNA.	3570	chr1	154407588	154407647
A_16_P00079304	0.0406627	0.00526743	up	1.06265	1.06265	0.0876637	INADL	Homo sapiens InaD-like (Drosophila) (INADL), mRNA.	10207	chr1	62322730	62322790
A_16_P35150490	0.00254429	4.10294e-05	down	1.0987	-1.0987	-0.135792	INADL	Homo sapiens InaD-like (Drosophila) (INADL), mRNA.	10207	chr1	62269089	62269149
A_16_P00079611	0.0075986	0.000302303	down	1.15572	-1.15572	-0.208794	INADL	Homo sapiens InaD-like (Drosophila) (INADL), mRNA.	10207	chr1	62553491	62553551
A_16_P15142944	0.0486394	0.00709079	down	1.06017	-1.06017	-0.0842936	INADL	Homo sapiens InaD-like (Drosophila) (INADL), mRNA.	10207	chr1	62306027	62306087
A_16_P15143185	0.0371031	0.00452501	down	1.08764	-1.08764	-0.121205	INADL	Homo sapiens InaD-like (Drosophila) (INADL), mRNA.	10207	chr1	62407640	62407700
A_16_P15142728	0.0371031	0.00452501	down	1.07694	-1.07694	-0.106932	INADL	Homo sapiens InaD-like (Drosophila) (INADL), mRNA.	10207	chr1	62219016	62219076
A_14_P105003	0.0433107	0.0058633	down	1.11287	-1.11287	-0.154279	INTS7	Homo sapiens integrator complex subunit 7 (INTS7), mRNA.	25896	chr1	212156098	212156158
A_14_P123657	0.0108926	0.000569148	up	1.14773	1.14773	0.198782	IPP	Homo sapiens intracisternal A particle-promoted polypeptide (IPP), transcript variant 2, mRNA.	3652	chr1	46165589	46165649
A_14_P104634	0.0155433	0.00104363	up	1.16364	1.16364	0.218642	IQGAP3	Homo sapiens IQ motif containing GTPase activating protein 3 (IQGAP3), mRNA.	128239	chr1	156541340	156541400
A_14_P120100	0.0351611	0.00414464	up	1.08522	1.08522	0.117982	IQGAP3	Homo sapiens IQ motif containing GTPase activating protein 3 (IQGAP3), mRNA.	128239	chr1	156514176	156514234
A_16_P15146668	0.0371031	0.00452501	up	1.08038	1.08038	0.111537	ITGB3BP	Homo sapiens integrin beta 3 binding protein (beta3-endonexin) (ITGB3BP), mRNA.	23421	chr1	63906438	63906498
A_14_P118734	0.0391604	0.00493672	down	1.06562	-1.06562	-0.0916994	ITGB3BP	Homo sapiens integrin beta 3 binding protein (beta3-endonexin) (ITGB3BP), mRNA.	23421	chr1	63986875	63986935
A_16_P00081545	0.00048582	1.38564e-06	down	1.13751	-1.13751	-0.185876	ITGB3BP	Homo sapiens integrin beta 3 binding protein (beta3-endonexin) (ITGB3BP), mRNA.	23421	chr1	63937896	63937956
A_14_P133068	0.0396677	0.00504481	down	1.06934	-1.06934	-0.0967161	IVNS1ABP	Homo sapiens influenza virus NS1A binding protein (IVNS1ABP), mRNA.	10625	chr1	185278265	185278324
A_14_P200949	0.0406627	0.00526743	down	1.09125	-1.09125	-0.125987	JAK1	Homo sapiens Janus kinase 1 (JAK1), mRNA.	3716	chr1	65365933	65365993
A_16_P15144068	0.0456356	0.00638302	down	1.06903	-1.06903	-0.0963016	KANK4	Homo sapiens KN motif and ankyrin repeat domains 4 (KANK4), mRNA.	163782	chr1	62777559	62777619
A_16_P00079886	0.0181468	0.00136589	down	1.13021	-1.13021	-0.176588	KANK4	Homo sapiens KN motif and ankyrin repeat domains 4 (KANK4), mRNA.	163782	chr1	62753374	62753434
A_14_P200644	0.00923183	0.000427277	down	1.11064	-1.11064	-0.151395	KCNA3	Homo sapiens potassium voltage-gated channel, shaker-related subfamily, member 3 (KCNA3), mRNA.	3738	chr1	111215229	111215289
A_16_P15259900	0.00398274	9.37239e-05	down	1.15141	-1.15141	-0.203398	KCND3	Homo sapiens potassium voltage-gated channel, Shal-related subfamily, member 3 (KCND3), transcript variant 1, mRNA.	3752	chr1	112350908	112350967
A_16_P35270611	0.0178973	0.00133319	down	1.15173	-1.15173	-0.203801	KCND3	Homo sapiens potassium voltage-gated channel, Shal-related subfamily, member 3 (KCND3), transcript variant 1, mRNA.	3752	chr1	112320998	112321058
A_16_P00148103	0.0444695	0.0061182	down	1.05619	-1.05619	-0.0788751	KCND3	Homo sapiens potassium voltage-gated channel, Shal-related subfamily, member 3 (KCND3), transcript variant 1, mRNA.	3752	chr1	112334173	112334233
A_16_P00148219	0.0361183	0.00433104	down	1.10651	-1.10651	-0.146012	KCND3	Homo sapiens potassium voltage-gated channel, Shal-related subfamily, member 3 (KCND3), transcript variant 1, mRNA.	3752	chr1	112405620	112405680
A_16_P00148321	0.00203902	2.59658e-05	up	1.22204	1.22204	0.289292	KCND3	Homo sapiens potassium voltage-gated channel, Shal-related subfamily, member 3 (KCND3), transcript variant 1, mRNA.	3752	chr1	112468648	112468708
A_16_P00148185	0.0312139	0.0033927	down	1.12086	-1.12086	-0.164606	KCND3	Homo sapiens potassium voltage-gated channel, Shal-related subfamily, member 3 (KCND3), transcript variant 1, mRNA.	3752	chr1	112385324	112385384
A_16_P00246505	0.0401437	0.00515504	up	1.13146	1.13146	0.178191	KCNH1	Homo sapiens potassium voltage-gated channel, subfamily H (eag-related), member 1 (KCNH1), transcript variant 2, mRNA.	3756	chr1	211055788	211055848
A_14_P110041	0.0253887	0.00241054	up	1.15285	1.15285	0.205203	KCNH1	Homo sapiens potassium voltage-gated channel, subfamily H (eag-related), member 1 (KCNH1), transcript variant 2, mRNA.	3756	chr1	211276849	211276909
A_16_P00246604	0.0223882	0.00195404	down	1.13065	-1.13065	-0.177149	KCNH1	Homo sapiens potassium voltage-gated channel, subfamily H (eag-related), member 1 (KCNH1), transcript variant 2, mRNA.	3756	chr1	211126046	211126106
A_16_P15434720	0.0181468	0.00136589	down	1.10488	-1.10488	-0.14389	KCNH1	Homo sapiens potassium voltage-gated channel, subfamily H (eag-related), member 1 (KCNH1), transcript variant 2, mRNA.	3756	chr1	211255662	211255722
A_16_P15444595	0.00128081	1.04076e-05	up	1.36706	1.36706	0.451077	KCNK2	Homo sapiens potassium channel, subfamily K, member 2 (KCNK2), transcript variant 1, mRNA.	3776	chr1	215369256	215369316
A_16_P15301525	0.0123084	0.000698666	up	1.14247	1.14247	0.192154	KCNN3	Homo sapiens potassium intermediate/small conductance calcium-activated channel, subfamily N, member 3 (KCNN3), transcript variant 2, mRNA.	3782	chr1	154732298	154732358
A_16_P00167973	0.00615105	0.000206462	up	1.17468	1.17468	0.232262	KCNN3	Homo sapiens potassium intermediate/small conductance calcium-activated channel, subfamily N, member 3 (KCNN3), transcript variant 2, mRNA.	3782	chr1	154697179	154697239
A_16_P15398516	0.0243671	0.00224853	up	1.1431	1.1431	0.192956	KCNT2	Homo sapiens potassium channel, subfamily T, member 2 (KCNT2), mRNA.	343450	chr1	196462556	196462616
A_14_P107342	0.0433107	0.0058633	down	1.08384	-1.08384	-0.116158	KCNT2	Homo sapiens potassium channel, subfamily T, member 2 (KCNT2), mRNA.	343450	chr1	196518385	196518445
A_16_P15398472	0.0223882	0.00195404	down	1.11257	-1.11257	-0.153898	KCNT2	Homo sapiens potassium channel, subfamily T, member 2 (KCNT2), mRNA.	343450	chr1	196448343	196448403
A_16_P15398488	0.0422732	0.00561802	down	1.15445	-1.15445	-0.207201	KCNT2	Homo sapiens potassium channel, subfamily T, member 2 (KCNT2), mRNA.	343450	chr1	196454939	196454999
A_16_P00225191	0.0428059	0.00573948	down	1.06418	-1.06418	-0.0897416	KCNT2	Homo sapiens potassium channel, subfamily T, member 2 (KCNT2), mRNA.	343450	chr1	196259309	196259369
A_16_P35415437	0.0417366	0.00549888	down	1.09258	-1.09258	-0.127732	KCNT2	Homo sapiens potassium channel, subfamily T, member 2 (KCNT2), mRNA.	343450	chr1	196481915	196481975
A_14_P125788	0.00653017	0.000230439	down	1.10671	-1.10671	-0.146283	KCNT2	Homo sapiens potassium channel, subfamily T, member 2 (KCNT2), mRNA.	343450	chr1	196294653	196294713
A_16_P15398189	0.00908792	0.000416169	down	1.17819	-1.17819	-0.236571	KCNT2	Homo sapiens potassium channel, subfamily T, member 2 (KCNT2), mRNA.	343450	chr1	196348236	196348296
A_16_P35059393	0.0450598	0.00624935	up	1.104	1.104	0.142735	KDM1A	Homo sapiens lysine (K)-specific demethylase 1A (KDM1A), transcript variant 1, mRNA.		chr1	23397855	23397915
A_14_P118362	0.0486394	0.00709079	down	1.0531	-1.0531	-0.0746377	KDM4A	Homo sapiens lysine (K)-specific demethylase 4A (KDM4A), mRNA.		chr1	44149336	44149392
A_16_P00234604	0.0133989	0.00081324	up	1.18688	1.18688	0.247173	KDM5B	Homo sapiens lysine (K)-specific demethylase 5B (KDM5B), mRNA.		chr1	202718110	202718170
A_14_P110120	0.0173928	0.00126993	up	1.14204	1.14204	0.191618	KIAA0319L	Homo sapiens KIAA0319-like (KIAA0319L), mRNA.	79932	chr1	35925919	35925979
A_16_P00044390	0.00509575	0.000147833	up	1.12021	1.12021	0.163769	KIAA0319L	Homo sapiens KIAA0319-like (KIAA0319L), mRNA.	79932	chr1	35985547	35985607
A_14_P108889	0.0412187	0.00538204	up	1.0709	1.0709	0.0988213	KIAA0319L	Homo sapiens KIAA0319-like (KIAA0319L), mRNA.	79932	chr1	35972435	35972495
A_16_P15082916	0.0126753	0.000735076	up	1.20267	1.20267	0.266245	KIAA0319L	Homo sapiens KIAA0319-like (KIAA0319L), mRNA.	79932	chr1	35932987	35933047
A_14_P130875	0.0124937	0.000716657	up	1.14003	1.14003	0.189068	KIAA0494	Homo sapiens KIAA0494 (KIAA0494), mRNA.	9813	chr1	47143818	47143878
A_14_P109063	0.0480379	0.00694384	down	1.06678	-1.06678	-0.0932607	KIAA0562	Homo sapiens KIAA0562 (KIAA0562), mRNA.	9731	chr1	3768945	3768996
A_16_P00018792	0.0295122	0.00310024	down	1.07305	-1.07305	-0.101712	KIAA1026	Homo sapiens kazrin (KIAA1026), transcript variant A, mRNA.		chr1	15387211	15387271
A_14_P136886	0.00783203	0.000318992	down	1.14527	-1.14527	-0.195688	KIAA1107	Homo sapiens KIAA1107 (KIAA1107), mRNA.	23285	chr1	92636077	92636137
A_14_P112201	0.00104013	6.82066e-06	down	1.19009	-1.19009	-0.251065	KIAA1324	Homo sapiens KIAA1324 (KIAA1324), mRNA.	57535	chr1	109745721	109745781
A_14_P129957	0.0361183	0.00433104	up	1.11916	1.11916	0.162416	KIAA1804	Homo sapiens mixed lineage kinase 4 (KIAA1804), mRNA.	84451	chr1	233507628	233507688
A_16_P15408493	0.0361183	0.00433104	up	1.109	1.109	0.149255	KIF14	Homo sapiens kinesin family member 14 (KIF14), mRNA.	9928	chr1	200555351	200555411
A_16_P35026539	0.00177226	1.96336e-05	up	1.18724	1.18724	0.247612	KIF1B	Homo sapiens kinesin family member 1B (KIF1B), transcript variant 2, mRNA.	23095	chr1	10338005	10338065
A_16_P00293319	0.0346805	0.0040542	up	1.1409	1.1409	0.190176	KIF26B	Homo sapiens kinesin family member 26B (KIF26B), mRNA.	55083	chr1	245674369	245674429
A_14_P133474	0.0287592	0.00296281	up	1.11465	1.11465	0.15659	KIF26B	Homo sapiens kinesin family member 26B (KIF26B), mRNA.	55083	chr1	245724755	245724815
A_16_P00293092	0.0132204	0.000793006	up	1.18118	1.18118	0.240223	KIF26B	Homo sapiens kinesin family member 26B (KIF26B), mRNA.	55083	chr1	245544132	245544192
A_16_P00189034	0.0499507	0.00739309	up	1.09997	1.09997	0.137468	KIFAP3	Homo sapiens kinesin-associated protein 3 (KIFAP3), mRNA.	22920	chr1	169975016	169975076
A_16_P00234834	0.00882591	0.000394759	up	1.15359	1.15359	0.20613	KLHL12	Homo sapiens kelch-like 12 (Drosophila) (KLHL12), mRNA.	59349	chr1	202870305	202870365
A_14_P101184	0.0211963	0.00177786	up	1.17698	1.17698	0.235084	KLHL12	Homo sapiens kelch-like 12 (Drosophila) (KLHL12), mRNA.	59349	chr1	202878047	202878107
A_14_P114892	0.0243671	0.00224853	up	1.11424	1.11424	0.156065	KLHL20	Homo sapiens kelch-like 20 (Drosophila) (KLHL20), mRNA.	27252	chr1	173701601	173701661
A_14_P110448	0.0155433	0.00104363	up	1.15229	1.15229	0.204502	KPNA6	Homo sapiens karyopherin alpha 6 (importin alpha 7) (KPNA6), mRNA.	23633	chr1	32625096	32625156
A_16_P00040149	0.0480379	0.00694384	up	1.09878	1.09878	0.135905	KPNA6	Homo sapiens karyopherin alpha 6 (importin alpha 7) (KPNA6), mRNA.	23633	chr1	32596039	32596099
A_14_P113322	0.0217786	0.00186404	up	1.08048	1.08048	0.111668	KRTCAP2	Homo sapiens keratinocyte associated protein 2 (KRTCAP2), mRNA.	200185	chr1	155145026	155145083
A_14_P110906	0.00993265	0.000487087	up	1.16245	1.16245	0.21717	LAD1	Homo sapiens ladinin 1 (LAD1), mRNA.	3898	chr1	201366802	201366861
A_16_P00244656	0.00632869	0.000218141	up	1.23611	1.23611	0.305804	LAMB3	Homo sapiens laminin, beta 3 (LAMB3), transcript variant 2, mRNA.	3914	chr1	209812253	209812313
A_16_P35383813	0.0272173	0.00270447	up	1.16039	1.16039	0.214611	LAMC2	Homo sapiens laminin, gamma 2 (LAMC2), transcript variant 2, mRNA.	3918	chr1	183162912	183162971
A_16_P00206963	0.0106111	0.000540462	up	1.19672	1.19672	0.259081	LAMC2	Homo sapiens laminin, gamma 2 (LAMC2), transcript variant 2, mRNA.	3918	chr1	183155968	183156028
A_14_P135836	0.00123842	9.7575e-06	up	1.36047	1.36047	0.444109	LBR	Homo sapiens lamin B receptor (LBR), transcript variant 1, mRNA.	3930	chr1	225601144	225601204
A_14_P138003	0.0396677	0.00504481	up	1.10435	1.10435	0.143203	LCE1C	Homo sapiens late cornified envelope 1C (LCE1C), mRNA.	353133	chr1	152778034	152778094
A_14_P200037	0.0346805	0.0040542	down	1.07578	-1.07578	-0.105381	LCE1E	Homo sapiens late cornified envelope 1E (LCE1E), mRNA.	353135	chr1	152760732	152760781
A_16_P00040310	0.0351611	0.00414464	up	1.10714	1.10714	0.146839	LCK	Homo sapiens lymphocyte-specific protein tyrosine kinase (LCK), transcript variant 2, mRNA.	3932	chr1	32732740	32732800
A_16_P00067861	0.0203308	0.00165543	down	1.1222	-1.1222	-0.166326	LDLRAD1	Homo sapiens low density lipoprotein receptor class A domain containing 1 (LDLRAD1), mRNA.	388633	chr1	54478250	54478310
A_16_P00084697	0.0150913	0.000993204	down	1.12175	-1.12175	-0.165746	LEPR	Homo sapiens leptin receptor (LEPR), transcript variant 2, mRNA.	3953	chr1	66067111	66067171
A_14_P117634	0.000442777	1.12214e-06	down	1.14623	-1.14623	-0.196903	LEPR	Homo sapiens leptin receptor (LEPR), transcript variant 2, mRNA.	3953	chr1	65935074	65935134
A_14_P110946	0.0223882	0.00195404	down	1.11211	-1.11211	-0.153294	LEPR	Homo sapiens leptin receptor (LEPR), transcript variant 2, mRNA.	3953	chr1	66036403	66036463
A_16_P15099652	0.00542561	0.000165367	down	1.14137	-1.14137	-0.190764	LEPRE1	Homo sapiens leucine proline-enriched proteoglycan (leprecan) 1 (LEPRE1), transcript variant 2, mRNA.	64175	chr1	43212005	43212065
A_16_P35430169	0.01382	0.000855151	up	1.07386	1.07386	0.10281	LGR6	Homo sapiens leucine-rich repeat-containing G protein-coupled receptor 6 (LGR6), transcript variant 1, mRNA.	59352	chr1	202164330	202164375
A_16_P15360548	0.0299319	0.00317112	up	1.21531	1.21531	0.281328	LHX4	Homo sapiens LIM homeobox 4 (LHX4), mRNA.	89884	chr1	180232700	180232760
A_16_P00202835	0.00154214	1.52655e-05	up	1.16579	1.16579	0.221302	LHX4	Homo sapiens LIM homeobox 4 (LHX4), mRNA.	89884	chr1	180201064	180201124
A_14_P138907	0.010101	0.000499949	down	1.07762	-1.07762	-0.107847	LHX8	Homo sapiens LIM homeobox 8 (LHX8), mRNA.	431707	chr1	75617997	75618057
A_16_P00033348	0.0375783	0.00462491	up	1.12806	1.12806	0.173842	LIN28	Homo sapiens lin-28 homolog (C. elegans) (LIN28), mRNA.	79727	chr1	26742914	26742974
A_16_P15283155	0.00964564	0.000462282	up	1.16633	1.16633	0.221975	LIX1L	Homo sapiens Lix1 homolog (mouse)-like (LIX1L), mRNA.	128077	chr1	145485852	145485912
A_16_P15304685	0.00748636	0.000294269	up	1.19143	1.19143	0.252697	LMNA	Homo sapiens lamin A/C (LMNA), transcript variant 2, mRNA.	4000	chr1	156092282	156092342
A_14_P128617	0.0106111	0.000540462	up	1.16708	1.16708	0.222905	LMNA	Homo sapiens lamin A/C (LMNA), transcript variant 2, mRNA.	4000	chr1	156102306	156102366
A_14_P202373	0.0146462	0.000945046	down	1.11375	-1.11375	-0.155429	LMO4	Homo sapiens LIM domain only 4 (LMO4), mRNA.	8543	chr1	87797896	87797955
A_16_P35429483	0.0264735	0.00258318	up	1.08571	1.08571	0.118639	LMOD1	Homo sapiens leiomodin 1 (smooth muscle) (LMOD1), mRNA.	25802	chr1	201898611	201898671
A_16_P15326038	0.0346805	0.0040542	up	1.174	1.174	0.231429	LMX1A	Homo sapiens LIM homeobox transcription factor 1, alpha (LMX1A), transcript variant 1, mRNA.	4009	chr1	165249928	165249988
A_16_P00182260	0.00422931	0.000105151	up	1.23846	1.23846	0.308544	LMX1A	Homo sapiens LIM homeobox transcription factor 1, alpha (LMX1A), transcript variant 1, mRNA.	4009	chr1	165235064	165235124
A_16_P00282810	0.00672488	0.000243384	up	1.28942	1.28942	0.366721	LOC100130331	Homo sapiens actin, gamma-like (LOC100130331), non-coding RNA.	100130331	chr1	238040720	238040780
A_16_P00282800	0.0337869	0.00387867	up	1.13449	1.13449	0.182038	LOC100130331	Homo sapiens actin, gamma-like (LOC100130331), non-coding RNA.	100130331	chr1	238034895	238034955
A_16_P35212158	0.00411082	9.92823e-05	up	1.22509	1.22509	0.292885	LOC339524	Homo sapiens hypothetical LOC339524 (LOC339524), transcript variant 5, non-coding RNA.	339524	chr1	87620497	87620557
A_16_P15326909	0.0474384	0.00679964	up	1.11178	1.11178	0.152869	LOC400794	Homo sapiens hypothetical LOC400794 (LOC400794), non-coding RNA.	400794	chr1	165541740	165541800
A_16_P15092540	0.0253887	0.00241054	up	1.12468	1.12468	0.169513	LOC728448	Homo sapiens peptidylprolyl isomerase E pseudogene (LOC728448), non-coding RNA.	728448	chr1	40011169	40011229
A_16_P00111824	0.0126753	0.000735076	up	1.11317	1.11317	0.154676	LPAR3	Homo sapiens lysophosphatidic acid receptor 3 (LPAR3), mRNA.	23566	chr1	85350426	85350486
A_16_P35454842	0.0159859	0.00109641	up	1.13804	1.13804	0.18655	LPGAT1	Homo sapiens lysophosphatidylglycerol acyltransferase 1 (LPGAT1), mRNA.	9926	chr1	211978155	211978215
A_14_P110503	0.00362795	7.87597e-05	up	1.17837	1.17837	0.236798	LPGAT1	Homo sapiens lysophosphatidylglycerol acyltransferase 1 (LPGAT1), mRNA.	9926	chr1	212002430	212002490
A_16_P35454871	0.0128595	0.000753935	up	1.13983	1.13983	0.188813	LPGAT1	Homo sapiens lysophosphatidylglycerol acyltransferase 1 (LPGAT1), mRNA.	9926	chr1	211992178	211992238
A_16_P35199136	0.00615105	0.000206462	down	1.11156	-1.11156	-0.152583	LPHN2	Homo sapiens latrophilin 2 (LPHN2), mRNA.	23266	chr1	82402508	82402568
A_16_P15190239	0.030343	0.00324347	down	1.10312	-1.10312	-0.141596	LPHN2	Homo sapiens latrophilin 2 (LPHN2), mRNA.	23266	chr1	82327706	82327766
A_16_P00107471	0.00177226	1.96336e-05	down	1.18293	-1.18293	-0.242361	LPHN2	Homo sapiens latrophilin 2 (LPHN2), mRNA.	23266	chr1	82278509	82278569
A_16_P15190263	0.00267899	4.49045e-05	down	1.13358	-1.13358	-0.18088	LPHN2	Homo sapiens latrophilin 2 (LPHN2), mRNA.	23266	chr1	82335163	82335223
A_16_P15190089	0.00392519	9.10562e-05	down	1.12978	-1.12978	-0.176039	LPHN2	Homo sapiens latrophilin 2 (LPHN2), mRNA.	23266	chr1	82284231	82284291
A_16_P15231792	0.024697	0.00230139	down	1.07802	-1.07802	-0.108382	LPPR4	Homo sapiens lipid phosphate phosphatase-related protein type 4 (LPPR4), transcript variant 2, mRNA.	9890	chr1	99738059	99738119
A_16_P15231849	0.00560299	0.00017485	down	1.17948	-1.17948	-0.238146	LPPR4	Homo sapiens lipid phosphate phosphatase-related protein type 4 (LPPR4), transcript variant 2, mRNA.	9890	chr1	99759045	99759105
A_16_P35240691	0.00542561	0.000165367	down	1.14626	-1.14626	-0.19693	LPPR5	Homo sapiens lipid phosphate phosphatase-related protein type 5 (LPPR5), transcript variant 2, mRNA.		chr1	99407186	99407246
A_16_P15231120	0.00228937	3.31846e-05	down	1.11904	-1.11904	-0.162261	LPPR5	Homo sapiens lipid phosphate phosphatase-related protein type 5 (LPPR5), transcript variant 2, mRNA.		chr1	99449673	99449733
A_16_P15231072	0.0264735	0.00258318	up	1.1033	1.1033	0.141826	LPPR5	Homo sapiens lipid phosphate phosphatase-related protein type 5 (LPPR5), transcript variant 2, mRNA.		chr1	99435512	99435572
A_16_P00131644	0.0020963	2.76157e-05	down	1.16512	-1.16512	-0.220475	LPPR5	Homo sapiens lipid phosphate phosphatase-related protein type 5 (LPPR5), transcript variant 2, mRNA.		chr1	99387487	99387547
A_16_P00149860	0.0351611	0.00414464	down	1.09844	-1.09844	-0.135458	LRIG2	Homo sapiens leucine-rich repeats and immunoglobulin-like domains 2 (LRIG2), mRNA.	9860	chr1	113641299	113641359
A_16_P00066761	0.00770608	0.000310543	down	1.09018	-1.09018	-0.124563	LRP8	Homo sapiens low density lipoprotein receptor-related protein 8, apolipoprotein e receptor (LRP8), transcript variant 2, mRNA.	7804	chr1	53719529	53719589
A_16_P15121858	0.00267899	4.49045e-05	down	1.14567	-1.14567	-0.196192	LRP8	Homo sapiens low density lipoprotein receptor-related protein 8, apolipoprotein e receptor (LRP8), transcript variant 2, mRNA.	7804	chr1	53725900	53725960
A_16_P00133442	0.0275847	0.00276705	up	1.10678	1.10678	0.146364	LRRC39	Homo sapiens leucine rich repeat containing 39 (LRRC39), mRNA.	127495	chr1	100634054	100634114
A_16_P15233855	0.0346805	0.0040542	down	1.10558	-1.10558	-0.144808	LRRC39	Homo sapiens leucine rich repeat containing 39 (LRRC39), mRNA.	127495	chr1	100620576	100620636
A_14_P134236	0.0159859	0.00109641	down	1.07891	-1.07891	-0.10957	LRRC40	Homo sapiens leucine rich repeat containing 40 (LRRC40), mRNA.	55631	chr1	70625043	70625097
A_14_P116056	0.0401437	0.00515504	down	1.05745	-1.05745	-0.0805905	LRRC42	Homo sapiens leucine rich repeat containing 42 (LRRC42), mRNA.	115353	chr1	54421821	54421881
A_16_P00090514	0.0117414	0.000647184	down	1.076	-1.076	-0.105674	LRRC7	Homo sapiens leucine rich repeat containing 7 (LRRC7), mRNA.	57554	chr1	70379789	70379849
A_16_P00090743	0.000849951	4.58538e-06	down	1.13316	-1.13316	-0.18035	LRRC7	Homo sapiens leucine rich repeat containing 7 (LRRC7), mRNA.	57554	chr1	70529726	70529786
A_14_P104009	0.0144184	0.000921786	down	1.07088	-1.07088	-0.0987982	LRRC7	Homo sapiens leucine rich repeat containing 7 (LRRC7), mRNA.	57554	chr1	70398254	70398314
A_16_P00090785	0.0123084	0.000698666	down	1.09848	-1.09848	-0.135514	LRRC7	Homo sapiens leucine rich repeat containing 7 (LRRC7), mRNA.	57554	chr1	70555458	70555518
A_16_P35169809	0.000970016	5.97954e-06	down	1.12213	-1.12213	-0.166243	LRRC7	Homo sapiens leucine rich repeat containing 7 (LRRC7), mRNA.	57554	chr1	70272249	70272309
A_14_P124060	0.0233508	0.00209655	up	1.28581	1.28581	0.362672	LRRC8B	Homo sapiens leucine rich repeat containing 8 family, member B (LRRC8B), transcript variant 2, mRNA.	23507	chr1	90033681	90033741
A_14_P135229	0.0391604	0.00493672	up	1.10836	1.10836	0.148431	LRRC8B	Homo sapiens leucine rich repeat containing 8 family, member B (LRRC8B), transcript variant 2, mRNA.	23507	chr1	90060326	90060386
A_14_P201100	0.0320304	0.00354816	down	1.10662	-1.10662	-0.146153	LRRC8B	Homo sapiens leucine rich repeat containing 8 family, member B (LRRC8B), transcript variant 2, mRNA.	23507	chr1	90033590	90033650
A_14_P200026	0.00222307	3.12194e-05	down	1.14073	-1.14073	-0.189956	LRRC8B	Homo sapiens leucine rich repeat containing 8 family, member B (LRRC8B), transcript variant 2, mRNA.	23507	chr1	90038998	90039058
A_16_P15209107	0.0401437	0.00515504	up	1.09693	1.09693	0.133478	LRRC8C	Homo sapiens leucine rich repeat containing 8 family, member C (LRRC8C), mRNA.	84230	chr1	90109302	90109362
A_16_P00118588	0.00466429	0.000124782	down	1.15155	-1.15155	-0.203577	LRRC8C	Homo sapiens leucine rich repeat containing 8 family, member C (LRRC8C), mRNA.	84230	chr1	90118106	90118166
A_16_P00118912	0.000911813	5.41484e-06	up	1.3793	1.3793	0.463937	LRRC8D	Homo sapiens leucine rich repeat containing 8 family, member D (LRRC8D), transcript variant 1, mRNA.	55144	chr1	90327532	90327592
A_16_P15171940	0.0124937	0.000716657	down	1.10258	-1.10258	-0.140889	LRRIQ3	Homo sapiens leucine-rich repeats and IQ motif containing 3 (LRRIQ3), mRNA.		chr1	74661917	74661977
A_16_P15171924	0.0333342	0.00379352	down	1.07396	-1.07396	-0.102942	LRRIQ3	Homo sapiens leucine-rich repeats and IQ motif containing 3 (LRRIQ3), mRNA.		chr1	74657761	74657821
A_16_P15171633	0.00560299	0.00017485	down	1.12373	-1.12373	-0.168301	LRRIQ3	Homo sapiens leucine-rich repeats and IQ motif containing 3 (LRRIQ3), mRNA.		chr1	74499986	74500046
A_16_P15171732	0.0422732	0.00561802	down	1.06132	-1.06132	-0.0858575	LRRIQ3	Homo sapiens leucine-rich repeats and IQ motif containing 3 (LRRIQ3), mRNA.		chr1	74552032	74552092
A_16_P00096536	0.0157533	0.00106972	down	1.11431	-1.11431	-0.156155	LRRIQ3	Homo sapiens leucine-rich repeats and IQ motif containing 3 (LRRIQ3), mRNA.		chr1	74649279	74649339
A_16_P15171777	0.0412187	0.00538204	up	1.16465	1.16465	0.21989	LRRIQ3	Homo sapiens leucine-rich repeats and IQ motif containing 3 (LRRIQ3), mRNA.		chr1	74572572	74572632
A_16_P15171825	0.0035116	7.42952e-05	down	1.09908	-1.09908	-0.136292	LRRIQ3	Homo sapiens leucine-rich repeats and IQ motif containing 3 (LRRIQ3), mRNA.		chr1	74606801	74606861
A_16_P00237503	0.0264735	0.00258318	up	1.17681	1.17681	0.234885	LRRN2	Homo sapiens leucine rich repeat neuronal 2 (LRRN2), transcript variant 1, mRNA.	10446	chr1	204651944	204652001
A_16_P00279722	0.0217786	0.00186404	up	1.20426	1.20426	0.268153	LYST	Homo sapiens lysosomal trafficking regulator (LYST), mRNA.	1130	chr1	236016221	236016281
A_16_P35513743	0.0468282	0.00665813	up	1.13019	1.13019	0.176561	LYST	Homo sapiens lysosomal trafficking regulator (LYST), mRNA.	1130	chr1	235849982	235850042
A_16_P15493661	0.00065537	2.67228e-06	up	1.39786	1.39786	0.483224	LYST	Homo sapiens lysosomal trafficking regulator (LYST), mRNA.	1130	chr1	235926123	235926183
A_16_P00049314	0.0217786	0.00186404	down	1.09952	-1.09952	-0.136876	MACF1	Homo sapiens microtubule-actin crosslinking factor 1 (MACF1), transcript variant 1, mRNA.	23499	chr1	39570017	39570077
A_16_P15091903	0.0124937	0.000716657	up	1.13624	1.13624	0.184269	MACF1	Homo sapiens microtubule-actin crosslinking factor 1 (MACF1), transcript variant 1, mRNA.	23499	chr1	39781116	39781176
A_14_P121669	0.0406627	0.00526743	up	1.11193	1.11193	0.153067	MAEL	Homo sapiens maelstrom homolog (Drosophila) (MAEL), mRNA.	84944	chr1	166991129	166991189
A_16_P00184652	0.0346805	0.0040542	down	1.11364	-1.11364	-0.155278	MAEL	Homo sapiens maelstrom homolog (Drosophila) (MAEL), mRNA.	84944	chr1	166983025	166983085
A_14_P123522	0.0107525	0.000554632	up	1.16186	1.16186	0.216431	MAEL	Homo sapiens maelstrom homolog (Drosophila) (MAEL), mRNA.	84944	chr1	166967807	166967867
A_16_P15263548	0.0346805	0.0040542	down	1.08987	-1.08987	-0.12416	MAGI3	Homo sapiens membrane associated guanylate kinase, WW and PDZ domain containing 3 (MAGI3), transcript variant 1, mRNA.	260425	chr1	113978222	113978282
A_16_P15263460	0.0316176	0.00346964	down	1.09145	-1.09145	-0.126248	MAGI3	Homo sapiens membrane associated guanylate kinase, WW and PDZ domain containing 3 (MAGI3), transcript variant 1, mRNA.	260425	chr1	113940332	113940392
A_16_P15263930	0.0178973	0.00133319	down	1.10122	-1.10122	-0.139104	MAGI3	Homo sapiens membrane associated guanylate kinase, WW and PDZ domain containing 3 (MAGI3), transcript variant 1, mRNA.	260425	chr1	114200730	114200790
A_16_P15263482	0.0124937	0.000716657	up	1.10344	1.10344	0.142014	MAGI3	Homo sapiens membrane associated guanylate kinase, WW and PDZ domain containing 3 (MAGI3), transcript variant 1, mRNA.	260425	chr1	113947343	113947403
A_16_P15263948	0.0380994	0.00472681	down	1.07823	-1.07823	-0.108663	MAGI3	Homo sapiens membrane associated guanylate kinase, WW and PDZ domain containing 3 (MAGI3), transcript variant 1, mRNA.	260425	chr1	114206968	114207028
A_16_P15272863	0.00964564	0.000462282	up	1.26614	1.26614	0.340438	MAN1A2	Homo sapiens mannosidase, alpha, class 1A, member 2 (MAN1A2), mRNA.	10905	chr1	118028398	118028458
A_16_P00032348	0.00340204	7.00708e-05	up	1.2496	1.2496	0.321461	MAN1C1	Homo sapiens mannosidase, alpha, class 1C, member 1 (MAN1C1), mRNA.	57134	chr1	26004913	26004973
A_16_P15458454	0.0312139	0.0033927	up	1.15371	1.15371	0.206278	MARK1	Homo sapiens MAP/microtubule affinity-regulating kinase 1 (MARK1), mRNA.	4139	chr1	220788245	220788305
A_16_P35112838	0.0391604	0.00493672	up	1.06993	1.06993	0.0975098	MAST2	Homo sapiens microtubule associated serine/threonine kinase 2 (MAST2), mRNA.	23139	chr1	46310806	46310866
A_14_P117522	0.00231935	3.42108e-05	up	1.18565	1.18565	0.245675	MDS2	Homo sapiens myelodysplastic syndrome 2 translocation associated (MDS2), non-coding RNA.	259283	chr1	23966798	23966858
A_14_P130882	0.0401437	0.00515504	up	1.06879	1.06879	0.0959837	MEAF6	Homo sapiens MYST/Esa1-associated factor 6 (MEAF6), mRNA.		chr1	37961410	37961470
A_14_P200022	0.000827723	4.28892e-06	down	1.20642	-1.20642	-0.270734	MED8	Homo sapiens mediator complex subunit 8 (MED8), transcript variant 3, mRNA.	112950	chr1	43850749	43850809
A_14_P120226	0.00869282	0.000384443	up	1.14451	1.14451	0.194725	MFSD2A	Homo sapiens major facilitator superfamily domain containing 2A (MFSD2A), transcript variant 1, mRNA.		chr1	40427703	40427763
A_16_P00102355	0.0386297	0.00483074	down	1.09751	-1.09751	-0.134238	MGC27382	Homo sapiens hypothetical MGC27382 (MGC27382), non-coding RNA.	149047	chr1	78818305	78818365
A_16_P00102377	0.0123084	0.000698666	down	1.12627	-1.12627	-0.171555	MGC27382	Homo sapiens hypothetical MGC27382 (MGC27382), non-coding RNA.	149047	chr1	78830988	78831048
A_16_P03808112	0.0203308	0.00165543	down	1.08679	-1.08679	-0.120067	MIB2	Homo sapiens mindbomb homolog 2 (Drosophila) (MIB2), transcript variant 2, mRNA.	142678	chr1	1558710	1558755
A_16_P15155250	0.0422732	0.00561802	down	1.08526	-1.08526	-0.118042	MIER1	Homo sapiens mesoderm induction early response 1 homolog (Xenopus laevis) (MIER1), transcript variant 2, mRNA.	57708	chr1	67404531	67404591
A_16_P00086681	0.0486394	0.00709079	down	1.08195	-1.08195	-0.113628	MIER1	Homo sapiens mesoderm induction early response 1 homolog (Xenopus laevis) (MIER1), transcript variant 2, mRNA.	57708	chr1	67442342	67442402
A_16_P35163295	0.00306768	5.87195e-05	down	1.13195	-1.13195	-0.178804	MIER1	Homo sapiens mesoderm induction early response 1 homolog (Xenopus laevis) (MIER1), transcript variant 2, mRNA.	57708	chr1	67411807	67411867
A_14_P104534	0.000645958	2.58258e-06	down	1.12297	-1.12297	-0.16732	MIER1	Homo sapiens mesoderm induction early response 1 homolog (Xenopus laevis) (MIER1), transcript variant 2, mRNA.	57708	chr1	67423724	67423784
A_14_P137921	0.0209055	0.00173615	up	1.11853	1.11853	0.161608	MIR548F1	Homo sapiens microRNA 548f-1 (MIR548F1), microRNA.		chr1	186278234	186278294
A_16_P00211897	0.0324585	0.00362829	up	1.15037	1.15037	0.202092	MIR548F1	Homo sapiens microRNA 548f-1 (MIR548F1), microRNA.		chr1	186355151	186355211
A_14_P109857	0.0328606	0.00371007	down	1.11265	-1.11265	-0.153999	MIR548F1	Homo sapiens microRNA 548f-1 (MIR548F1), microRNA.		chr1	186329914	186329974
A_16_P15375701	0.01382	0.000855151	down	1.15704	-1.15704	-0.210435	MIR548F1	Homo sapiens microRNA 548f-1 (MIR548F1), microRNA.		chr1	186384633	186384693
A_14_P120768	0.0456356	0.00638302	up	1.15327	1.15327	0.205736	MIR548F1	Homo sapiens microRNA 548f-1 (MIR548F1), microRNA.		chr1	186336997	186337057
A_16_P00211815	0.0337869	0.00387867	up	1.11418	1.11418	0.155981	MIR548F1	Homo sapiens microRNA 548f-1 (MIR548F1), microRNA.		chr1	186313124	186313184
A_14_P131436	0.00218735	3.02787e-05	up	1.27667	1.27667	0.352383	MKNK1	Homo sapiens MAP kinase interacting serine/threonine kinase 1 (MKNK1), transcript variant 3, mRNA.	8569	chr1	47040617	47040676
A_16_P15332001	0.0268252	0.00264319	up	1.143	1.143	0.192831	MPZL1	Homo sapiens myelin protein zero-like 1 (MPZL1), transcript variant 3, mRNA.	9019	chr1	167753691	167753751
A_14_P201931	0.00398274	9.37239e-05	up	1.2167	1.2167	0.282973	MRPS14	Homo sapiens mitochondrial ribosomal protein S14 (MRPS14), nuclear gene encoding mitochondrial protein, mRNA.	63931	chr1	174987548	174987608
A_14_P139192	0.0214998	0.00182048	down	1.0786	-1.0786	-0.109164	MSH4	Homo sapiens mutS homolog 4 (E. coli) (MSH4), mRNA.	4438	chr1	76333171	76333231
A_16_P15175546	0.0371031	0.00452501	up	1.09104	1.09104	0.125702	MSH4	Homo sapiens mutS homolog 4 (E. coli) (MSH4), mRNA.	4438	chr1	76276449	76276509
A_16_P00047672	0.0375783	0.00462491	up	1.08288	1.08288	0.114873	MTF1	Homo sapiens metal-regulatory transcription factor 1 (MTF1), mRNA.	4520	chr1	38289403	38289463
A_14_P103035	0.0142069	0.000899058	down	1.10305	-1.10305	-0.141495	MTF2	Homo sapiens metal response element binding transcription factor 2 (MTF2), transcript variant 3, mRNA.	22823	chr1	93545990	93546050
A_16_P15216888	0.0181468	0.00136589	down	1.0935	-1.0935	-0.128959	MTF2	Homo sapiens metal response element binding transcription factor 2 (MTF2), transcript variant 3, mRNA.	22823	chr1	93586089	93586149
A_14_P129585	0.0108926	0.000569148	up	1.14813	1.14813	0.199292	MTMR9L	Homo sapiens myotubularin related protein 9-like (MTMR9L), non-coding RNA.		chr1	32697256	32697316
A_16_P15027600	0.0107525	0.000554632	down	1.56079	-1.56079	-0.642275	MTOR	Homo sapiens mechanistic target of rapamycin (serine/threonine kinase) (MTOR), mRNA.		chr1	11303392	11303452
A_14_P125222	0.0333342	0.00379352	up	1.09327	1.09327	0.128652	MTR	Homo sapiens 5-methyltetrahydrofolate-homocysteine methyltransferase (MTR), mRNA.	4548	chr1	236978816	236978876
A_16_P15253811	0.0106111	0.000540462	down	1.10076	-1.10076	-0.138504	MYBPHL	Homo sapiens myosin binding protein H-like (MYBPHL), mRNA.	343263	chr1	109840879	109840938
A_16_P00074647	0.0299319	0.00317112	up	1.18876	1.18876	0.249455	MYSM1	Homo sapiens Myb-like, SWIRM and MPN domains 1 (MYSM1), mRNA.	114803	chr1	59161088	59161148
A_16_P00057599	0.00770608	0.000310543	up	1.13962	1.13962	0.188551	NASP	Homo sapiens nuclear autoantigenic sperm protein (histone-binding) (NASP), transcript variant 2, mRNA.	4678	chr1	46079821	46079881
A_16_P00233261	0.00819132	0.00034565	up	1.19894	1.19894	0.261754	NAV1	Homo sapiens neuron navigator 1 (NAV1), transcript variant 1, mRNA.	89796	chr1	201743501	201743561
A_16_P00233268	0.0380994	0.00472681	up	1.12927	1.12927	0.175385	NAV1	Homo sapiens neuron navigator 1 (NAV1), transcript variant 1, mRNA.	89796	chr1	201749858	201749918
A_16_P35042778	0.0272173	0.00270447	down	1.0858	-1.0858	-0.118761	NBPF1	Homo sapiens neuroblastoma breakpoint family, member 1 (NBPF1), mRNA.	55672	chr1	16935125	16935170
A_16_P00159342	0.0164415	0.00115165	up	1.11119	1.11119	0.152109	NBPF9	Homo sapiens neuroblastoma breakpoint family, member 9 (NBPF9), mRNA.	440670	chr1	144693531///144968834	144968894///144693591
A_14_P102200	0.0214998	0.00182048	up	1.15955	1.15955	0.213569	NCF2	Homo sapiens neutrophil cytosolic factor 2 (NCF2), transcript variant 1, mRNA.	4688	chr1	183525169	183525229
A_16_P15167064	0.0140134	0.000876849	up	1.17006	1.17006	0.226586	NEGR1	Homo sapiens neuronal growth regulator 1 (NEGR1), mRNA.	257194	chr1	72485373	72485433
A_16_P15166340	0.0236999	0.00214613	down	1.11945	-1.11945	-0.162787	NEGR1	Homo sapiens neuronal growth regulator 1 (NEGR1), mRNA.	257194	chr1	72234930	72234990
A_16_P15166415	0.00480856	0.000132061	down	1.13282	-1.13282	-0.179922	NEGR1	Homo sapiens neuronal growth regulator 1 (NEGR1), mRNA.	257194	chr1	72261169	72261229
A_16_P00093325	0.0243671	0.00224853	down	1.06148	-1.06148	-0.0860806	NEGR1	Homo sapiens neuronal growth regulator 1 (NEGR1), mRNA.	257194	chr1	72302765	72302825
A_16_P15167208	0.016217	0.00112372	down	1.08659	-1.08659	-0.119811	NEGR1	Homo sapiens neuronal growth regulator 1 (NEGR1), mRNA.	257194	chr1	72529376	72529436
A_14_P135460	0.00222307	3.12194e-05	down	1.20461	-1.20461	-0.268565	NEGR1	Homo sapiens neuronal growth regulator 1 (NEGR1), mRNA.	257194	chr1	72058593	72058653
A_16_P35175770	0.0396677	0.00504481	down	1.07573	-1.07573	-0.105316	NEGR1	Homo sapiens neuronal growth regulator 1 (NEGR1), mRNA.	257194	chr1	72621702	72621762
A_16_P35175280	0.0275847	0.00276705	down	1.0823	-1.0823	-0.1141	NEGR1	Homo sapiens neuronal growth regulator 1 (NEGR1), mRNA.	257194	chr1	72468060	72468120
A_14_P112949	0.00362795	7.87597e-05	down	1.09142	-1.09142	-0.126211	NEGR1	Homo sapiens neuronal growth regulator 1 (NEGR1), mRNA.	257194	chr1	71957417	71957477
A_16_P15165449	0.0220936	0.00190855	down	1.06122	-1.06122	-0.0857269	NEGR1	Homo sapiens neuronal growth regulator 1 (NEGR1), mRNA.	257194	chr1	71912283	71912343
A_16_P15167030	0.00306768	5.87195e-05	down	1.08975	-1.08975	-0.124	NEGR1	Homo sapiens neuronal growth regulator 1 (NEGR1), mRNA.	257194	chr1	72474467	72474527
A_16_P15165513	0.00386414	8.84604e-05	down	1.1424	-1.1424	-0.19207	NEGR1	Homo sapiens neuronal growth regulator 1 (NEGR1), mRNA.	257194	chr1	71932588	71932648
A_16_P15165642	0.0220936	0.00190855	down	1.06386	-1.06386	-0.0893144	NEGR1	Homo sapiens neuronal growth regulator 1 (NEGR1), mRNA.	257194	chr1	71979152	71979212
A_16_P15166862	0.0209055	0.00173615	down	1.06868	-1.06868	-0.0958277	NEGR1	Homo sapiens neuronal growth regulator 1 (NEGR1), mRNA.	257194	chr1	72423689	72423749
A_16_P15167843	0.0438892	0.00598953	down	1.06799	-1.06799	-0.0948945	NEGR1	Homo sapiens neuronal growth regulator 1 (NEGR1), mRNA.	257194	chr1	72742039	72742099
A_16_P15167596	0.00473557	0.000128373	down	1.10862	-1.10862	-0.148762	NEGR1	Homo sapiens neuronal growth regulator 1 (NEGR1), mRNA.	257194	chr1	72656809	72656869
A_16_P15166460	0.0153171	0.00101813	down	1.07293	-1.07293	-0.101552	NEGR1	Homo sapiens neuronal growth regulator 1 (NEGR1), mRNA.	257194	chr1	72284945	72285005
A_16_P15166813	0.0253887	0.00241054	down	1.06567	-1.06567	-0.0917587	NEGR1	Homo sapiens neuronal growth regulator 1 (NEGR1), mRNA.	257194	chr1	72406392	72406452
A_16_P00092783	0.0236999	0.00214613	down	1.08807	-1.08807	-0.121766	NEGR1	Homo sapiens neuronal growth regulator 1 (NEGR1), mRNA.	257194	chr1	71964441	71964501
A_16_P15166732	0.0316176	0.00346964	down	1.06875	-1.06875	-0.0959264	NEGR1	Homo sapiens neuronal growth regulator 1 (NEGR1), mRNA.	257194	chr1	72380291	72380351
A_16_P15167735	0.0186711	0.00143354	down	1.07991	-1.07991	-0.110907	NEGR1	Homo sapiens neuronal growth regulator 1 (NEGR1), mRNA.	257194	chr1	72707893	72707953
A_16_P15165971	0.0438892	0.00598953	down	1.10018	-1.10018	-0.137742	NEGR1	Homo sapiens neuronal growth regulator 1 (NEGR1), mRNA.	257194	chr1	72093110	72093170
A_16_P15166472	0.0126753	0.000735076	down	1.10082	-1.10082	-0.138581	NEGR1	Homo sapiens neuronal growth regulator 1 (NEGR1), mRNA.	257194	chr1	72292028	72292088
A_16_P00092616	0.0104243	0.00052663	up	1.16715	1.16715	0.222996	NEGR1	Homo sapiens neuronal growth regulator 1 (NEGR1), mRNA.	257194	chr1	71875972	71876032
A_16_P15165771	0.00129864	1.07479e-05	down	1.12848	-1.12848	-0.174387	NEGR1	Homo sapiens neuronal growth regulator 1 (NEGR1), mRNA.	257194	chr1	72021695	72021755
A_16_P15167549	0.0492988	0.00724052	up	1.15042	1.15042	0.202166	NEGR1	Homo sapiens neuronal growth regulator 1 (NEGR1), mRNA.	257194	chr1	72639246	72639306
A_16_P15166640	0.00502757	0.000143731	down	1.1053	-1.1053	-0.144435	NEGR1	Homo sapiens neuronal growth regulator 1 (NEGR1), mRNA.	257194	chr1	72346751	72346811
A_16_P35175446	0.00362795	7.87597e-05	up	1.33622	1.33622	0.418155	NEGR1	Homo sapiens neuronal growth regulator 1 (NEGR1), mRNA.	257194	chr1	72518164	72518224
A_14_P101182	0.00416859	0.000102177	up	1.17732	1.17732	0.235509	NEK2	Homo sapiens NIMA (never in mitosis gene a)-related kinase 2 (NEK2), mRNA.	4751	chr1	211840424	211840476
A_16_P00228004	0.0401437	0.00515504	down	1.10643	-1.10643	-0.145915	NEK7	Homo sapiens NIMA (never in mitosis gene a)-related kinase 7 (NEK7), mRNA.	140609	chr1	198256977	198257037
A_14_P108921	0.0351611	0.00414464	down	1.11304	-1.11304	-0.154505	NEXN	Homo sapiens nexilin (F actin binding protein) (NEXN), mRNA.	91624	chr1	78355685	78355745
A_16_P15180510	0.0171518	0.00123935	down	1.1518	-1.1518	-0.203891	NEXN	Homo sapiens nexilin (F actin binding protein) (NEXN), mRNA.	91624	chr1	78383948	78384008
A_16_P00237724	0.0366139	0.00442706	up	1.08029	1.08029	0.111413	NFASC	Homo sapiens neurofascin homolog (chicken) (NFASC), transcript variant 5, mRNA.	23114	chr1	204808246	204808306
A_16_P00078479	0.00381018	8.59345e-05	up	1.21056	1.21056	0.275671	NFIA	Homo sapiens nuclear factor I/A (NFIA), transcript variant 3, mRNA.	4774	chr1	61764098	61764157
A_16_P35149155	0.0438892	0.00598953	down	1.12069	-1.12069	-0.164389	NFIA	Homo sapiens nuclear factor I/A (NFIA), transcript variant 3, mRNA.	4774	chr1	61748733	61748793
A_16_P00078024	0.0119295	0.000663939	down	1.07401	-1.07401	-0.103004	NFIA	Homo sapiens nuclear factor I/A (NFIA), transcript variant 3, mRNA.	4774	chr1	61546347	61546407
A_14_P102730	0.00748636	0.000294269	down	1.17745	-1.17745	-0.235663	NFIA	Homo sapiens nuclear factor I/A (NFIA), transcript variant 3, mRNA.	4774	chr1	61743170	61743229
A_14_P103537	0.00569236	0.000179782	down	1.10404	-1.10404	-0.142797	NFIA	Homo sapiens nuclear factor I/A (NFIA), transcript variant 3, mRNA.	4774	chr1	61700429	61700489
A_16_P00078659	0.0371031	0.00452501	down	1.09063	-1.09063	-0.125159	NFIA	Homo sapiens nuclear factor I/A (NFIA), transcript variant 3, mRNA.	4774	chr1	61861220	61861280
A_16_P00078282	0.0197544	0.00157818	up	1.12009	1.12009	0.163608	NFIA	Homo sapiens nuclear factor I/A (NFIA), transcript variant 3, mRNA.	4774	chr1	61670929	61670989
A_16_P00078555	0.000755253	3.62598e-06	down	1.15006	-1.15006	-0.20171	NFIA	Homo sapiens nuclear factor I/A (NFIA), transcript variant 3, mRNA.	4774	chr1	61804736	61804796
A_16_P15095138	0.0200468	0.00161638	up	1.10126	1.10126	0.139156	NFYC	Homo sapiens nuclear transcription factor Y, gamma (NFYC), transcript variant 3, mRNA.	4802	chr1	41204683	41204743
A_14_P122375	0.0412187	0.00538204	up	1.16301	1.16301	0.21786	NGF	Homo sapiens nerve growth factor (beta polypeptide) (NGF), mRNA.	4803	chr1	115874784	115874844
A_14_P126963	0.01382	0.000855151	up	1.16899	1.16899	0.225263	NGF	Homo sapiens nerve growth factor (beta polypeptide) (NGF), mRNA.	4803	chr1	115854589	115854649
A_16_P00030999	0.0279629	0.00283095	up	1.07278	1.07278	0.101359	NIPAL3	Homo sapiens NIPA-like domain containing 3 (NIPAL3), mRNA.		chr1	24758457	24758517
A_16_P15522006	0.0226946	0.00200052	up	1.11879	1.11879	0.161938	NLRP3	Homo sapiens NLR family, pyrin domain containing 3 (NLRP3), transcript variant 3, mRNA.	114548	chr1	247593941	247594001
A_14_P115553	0.0307738	0.00331732	up	1.22739	1.22739	0.295598	NME7	Homo sapiens non-metastatic cells 7, protein expressed in (nucleoside-diphosphate kinase) (NME7), transcript variant 1, mRNA.	29922	chr1	169206874	169206923
A_16_P15024478	0.0406627	0.00526743	up	1.11553	1.11553	0.157734	NMNAT1	Homo sapiens nicotinamide nucleotide adenylyltransferase 1 (NMNAT1), mRNA.	64802	chr1	10035815	10035875
A_16_P00207201	0.0279629	0.00283095	up	1.10543	1.10543	0.14461	NMNAT2	Homo sapiens nicotinamide nucleotide adenylyltransferase 2 (NMNAT2), transcript variant 1, mRNA.	23057	chr1	183286133	183286193
A_14_P131151	0.0462323	0.00651927	up	1.19475	1.19475	0.256704	NOS1AP	Homo sapiens nitric oxide synthase 1 (neuronal) adaptor protein (NOS1AP), transcript variant 3, mRNA.	9722	chr1	162053487	162053547
A_16_P00177703	0.0486394	0.00709079	up	1.09443	1.09443	0.130186	NOS1AP	Homo sapiens nitric oxide synthase 1 (neuronal) adaptor protein (NOS1AP), transcript variant 3, mRNA.	9722	chr1	162063728	162063788
A_14_P100664	0.023028	0.00204802	down	1.13317	-1.13317	-0.180367	NOS1AP	Homo sapiens nitric oxide synthase 1 (neuronal) adaptor protein (NOS1AP), transcript variant 3, mRNA.	9722	chr1	162175442	162175502
A_14_P102044	0.00819132	0.00034565	down	1.07851	-1.07851	-0.109041	NOTCH2	Homo sapiens Notch homolog 2 (Drosophila) (NOTCH2), mRNA.	4853	chr1	120529669	120529725
A_14_P101383	0.0380994	0.00472681	up	1.08128	1.08128	0.112741	NPHP4	Homo sapiens nephronophthisis 4 (NPHP4), mRNA.	261734	chr1	5966622	5966682
A_16_P00006750	0.0272173	0.00270447	down	1.07996	-1.07996	-0.110978	NPHP4	Homo sapiens nephronophthisis 4 (NPHP4), mRNA.	261734	chr1	5932493	5932553
A_14_P139620	0.0499507	0.00739309	down	1.12143	-1.12143	-0.165337	NPPA	Homo sapiens natriuretic peptide precursor A (NPPA), mRNA.	4878	chr1	11905865	11905922
A_14_P116960	0.0169113	0.00120946	up	1.11226	1.11226	0.153494	NR5A2	Homo sapiens nuclear receptor subfamily 5, group A, member 2 (NR5A2), transcript variant 2, mRNA.	2494	chr1	200125243	200125303
A_16_P35424391	0.00632869	0.000218141	up	1.17682	1.17682	0.234888	NR5A2	Homo sapiens nuclear receptor subfamily 5, group A, member 2 (NR5A2), transcript variant 2, mRNA.	2494	chr1	200107115	200107175
A_14_P117514	0.0169113	0.00120946	up	1.17757	1.17757	0.235809	NRD1	Homo sapiens nardilysin (N-arginine dibasic convertase) (NRD1), transcript variant 2, mRNA.	4898	chr1	52259933	52259993
A_14_P137130	0.0223882	0.00195404	down	1.10254	-1.10254	-0.140834	NSL1	Homo sapiens NSL1, MIND kinetochore complex component, homolog (S. cerevisiae) (NSL1), transcript variant 2, mRNA.	25936	chr1	212963758	212963818
A_14_P111608	0.0117414	0.000647184	up	1.20215	1.20215	0.265622	NTNG1	Homo sapiens netrin G1 (NTNG1), transcript variant 1, mRNA.	22854	chr1	107867285	107867345
A_16_P35258657	0.0140134	0.000876849	down	1.11292	-1.11292	-0.15435	NTNG1	Homo sapiens netrin G1 (NTNG1), transcript variant 1, mRNA.	22854	chr1	107696766	107696826
A_16_P00142299	0.0110621	0.000584017	down	1.10637	-1.10637	-0.145836	NTNG1	Homo sapiens netrin G1 (NTNG1), transcript variant 1, mRNA.	22854	chr1	108016862	108016922
A_16_P15248948	0.00311887	6.04819e-05	down	1.11704	-1.11704	-0.159676	NTNG1	Homo sapiens netrin G1 (NTNG1), transcript variant 1, mRNA.	22854	chr1	107826935	107826995
A_16_P15249350	0.0295122	0.00310024	down	1.085	-1.085	-0.117696	NTNG1	Homo sapiens netrin G1 (NTNG1), transcript variant 1, mRNA.	22854	chr1	107965238	107965298
A_16_P35258995	0.000827723	4.28892e-06	down	1.13262	-1.13262	-0.179663	NTNG1	Homo sapiens netrin G1 (NTNG1), transcript variant 1, mRNA.	22854	chr1	107816868	107816928
A_16_P00141772	0.00819132	0.00034565	down	1.10675	-1.10675	-0.146324	NTNG1	Homo sapiens netrin G1 (NTNG1), transcript variant 1, mRNA.	22854	chr1	107717862	107717922
A_16_P15249090	0.0422732	0.00561802	down	1.07414	-1.07414	-0.103187	NTNG1	Homo sapiens netrin G1 (NTNG1), transcript variant 1, mRNA.	22854	chr1	107875222	107875282
A_16_P15248877	0.0181468	0.00136589	down	1.16471	-1.16471	-0.21997	NTNG1	Homo sapiens netrin G1 (NTNG1), transcript variant 1, mRNA.	22854	chr1	107802742	107802802
A_16_P15299943	0.0126753	0.000735076	up	1.17994	1.17994	0.238716	NUP210L	Homo sapiens nucleoporin 210kDa-like (NUP210L), transcript variant 2, mRNA.	91181	chr1	153995546	153995606
A_16_P15299958	0.00450789	0.000117884	up	1.15594	1.15594	0.209064	NUP210L	Homo sapiens nucleoporin 210kDa-like (NUP210L), transcript variant 2, mRNA.	91181	chr1	154012985	154013045
A_16_P15475510	0.00882591	0.000394759	up	1.15423	1.15423	0.206924	OBSCN	Homo sapiens obscurin, cytoskeletal calmodulin and titin-interacting RhoGEF (OBSCN), transcript variant 1, mRNA.	84033	chr1	228448602	228448662
A_16_P35210175	0.0115746	0.000630822	down	1.12437	-1.12437	-0.169115	ODF2L	Homo sapiens outer dense fiber of sperm tails 2-like (ODF2L), transcript variant 2, mRNA.	57489	chr1	86818518	86818578
A_16_P00113927	0.0316176	0.00346964	down	1.10299	-1.10299	-0.141424	ODF2L	Homo sapiens outer dense fiber of sperm tails 2-like (ODF2L), transcript variant 2, mRNA.	57489	chr1	86860825	86860885
A_14_P109287	0.00195198	2.36655e-05	down	1.1103	-1.1103	-0.150948	ODF2L	Homo sapiens outer dense fiber of sperm tails 2-like (ODF2L), transcript variant 2, mRNA.	57489	chr1	86846224	86846284
A_16_P15237873	0.00129864	1.07479e-05	down	1.14122	-1.14122	-0.190574	OLFM3	Homo sapiens olfactomedin 3 (OLFM3), mRNA.	118427	chr1	102362526	102362586
A_16_P00135847	0.00222307	3.12194e-05	down	1.14227	-1.14227	-0.1919	OLFM3	Homo sapiens olfactomedin 3 (OLFM3), mRNA.	118427	chr1	102382111	102382171
A_16_P15237809	0.00328675	6.60743e-05	down	1.13678	-1.13678	-0.184948	OLFM3	Homo sapiens olfactomedin 3 (OLFM3), mRNA.	118427	chr1	102342335	102342395
A_16_P35247778	0.00247542	3.86248e-05	down	1.14341	-1.14341	-0.193337	OLFM3	Homo sapiens olfactomedin 3 (OLFM3), mRNA.	118427	chr1	102356510	102356570
A_16_P15238023	0.00149415	1.43281e-05	down	1.13817	-1.13817	-0.186717	OLFM3	Homo sapiens olfactomedin 3 (OLFM3), mRNA.	118427	chr1	102417199	102417259
A_16_P00135917	0.0396677	0.00504481	down	1.10382	-1.10382	-0.142503	OLFM3	Homo sapiens olfactomedin 3 (OLFM3), mRNA.	118427	chr1	102425500	102425560
A_16_P35247631	0.0337869	0.00387867	up	1.17827	1.17827	0.236666	OLFM3	Homo sapiens olfactomedin 3 (OLFM3), mRNA.	118427	chr1	102304969	102305029
A_16_P15237966	0.00164857	1.73188e-05	down	1.13015	-1.13015	-0.176509	OLFM3	Homo sapiens olfactomedin 3 (OLFM3), mRNA.	118427	chr1	102392943	102393003
A_16_P15318129	0.0264735	0.00258318	up	1.12731	1.12731	0.17289	OLFML2B	Homo sapiens olfactomedin-like 2B (OLFML2B), mRNA.	25903	chr1	161987116	161987176
A_14_P126503	0.0126753	0.000735076	down	1.11144	-1.11144	-0.152435	OLFML3	Homo sapiens olfactomedin-like 3 (OLFML3), mRNA.	56944	chr1	114523546	114523600
A_16_P15134734	0.00123842	9.7575e-06	down	1.09969	-1.09969	-0.137093	OMA1	Homo sapiens OMA1 homolog, zinc metallopeptidase (S. cerevisiae) (OMA1), mRNA.	115209	chr1	58982379	58982439
A_16_P15134668	0.0240504	0.00219678	down	1.06916	-1.06916	-0.0964789	OMA1	Homo sapiens OMA1 homolog, zinc metallopeptidase (S. cerevisiae) (OMA1), mRNA.	115209	chr1	58946591	58946651
A_16_P00074367	0.0209055	0.00173615	down	1.05923	-1.05923	-0.083011	OMA1	Homo sapiens OMA1 homolog, zinc metallopeptidase (S. cerevisiae) (OMA1), mRNA.	115209	chr1	58952131	58952191
A_16_P15068202	0.0150913	0.000993204	up	1.08501	1.08501	0.117704	OPRD1	Homo sapiens opioid receptor, delta 1 (OPRD1), mRNA.	4985	chr1	29146620	29146680
A_16_P15523330	0.0396677	0.00504481	down	1.17021	-1.17021	-0.226762	OR2L13	Homo sapiens olfactory receptor, family 2, subfamily L, member 13 (OR2L13), mRNA.	284521	chr1	248210073	248210133
A_16_P15523371	0.0456356	0.00638302	up	1.15064	1.15064	0.202441	OR2L13	Homo sapiens olfactory receptor, family 2, subfamily L, member 13 (OR2L13), mRNA.	284521	chr1	248242578	248242638
A_16_P00296679	0.0328606	0.00371007	up	1.13966	1.13966	0.188606	OR2L13	Homo sapiens olfactory receptor, family 2, subfamily L, member 13 (OR2L13), mRNA.	284521	chr1	248256804	248256864
A_14_P123139	0.0124937	0.000716657	down	1.0772	-1.0772	-0.107291	OSBPL9	Homo sapiens oxysterol binding protein-like 9 (OSBPL9), transcript variant 6, mRNA.	114883	chr1	52179685	52179739
A_16_P15118742	0.00340204	7.00708e-05	up	1.10975	1.10975	0.150231	OSBPL9	Homo sapiens oxysterol binding protein-like 9 (OSBPL9), transcript variant 6, mRNA.	114883	chr1	52221685	52221744
A_14_P116566	0.0342432	0.00396555	down	1.11141	-1.11141	-0.152397	OSBPL9	Homo sapiens oxysterol binding protein-like 9 (OSBPL9), transcript variant 6, mRNA.	114883	chr1	52093798	52093858
A_16_P15290838	0.0312139	0.0033927	up	1.1537	1.1537	0.206267	OTUD7B	Homo sapiens OTU domain containing 7B (OTUD7B), mRNA.	56957	chr1	149959864	149959924
A_14_P132649	0.0406627	0.00526743	up	1.08688	1.08688	0.120195	OVGP1	Homo sapiens oviductal glycoprotein 1, 120kDa (OVGP1), mRNA.	5016	chr1	111956913	111956973
A_16_P15258947	0.0351611	0.00414464	down	1.10147	-1.10147	-0.139434	OVGP1	Homo sapiens oviductal glycoprotein 1, 120kDa (OVGP1), mRNA.	5016	chr1	111968993	111969053
A_14_P105422	0.0166851	0.00118023	up	1.14515	1.14515	0.195539	PADI1	Homo sapiens peptidyl arginine deiminase, type I (PADI1), mRNA.	29943	chr1	17535627	17535687
A_16_P00021028	0.0192154	0.00150426	up	1.11072	1.11072	0.151495	PADI2	Homo sapiens peptidyl arginine deiminase, type II (PADI2), mRNA.	11240	chr1	17417357	17417417
A_16_P15041409	0.0324585	0.00362829	up	1.19501	1.19501	0.25702	PADI2	Homo sapiens peptidyl arginine deiminase, type II (PADI2), mRNA.	11240	chr1	17399321	17399381
A_14_P124345	0.0268252	0.00264319	down	1.1942	-1.1942	-0.25605	PADI3	Homo sapiens peptidyl arginine deiminase, type III (PADI3), mRNA.	51702	chr1	17610690	17610746
A_16_P15042040	0.0316176	0.00346964	up	1.15898	1.15898	0.212852	PADI4	Homo sapiens peptidyl arginine deiminase, type IV (PADI4), mRNA.	23569	chr1	17685351	17685411
A_14_P200007	0.0287592	0.00296281	up	1.18377	1.18377	0.24339	PADI6	Homo sapiens peptidyl arginine deiminase, type VI (PADI6), mRNA.	353238	chr1	17721081	17721141
A_16_P00132734	0.0283729	0.00289619	down	1.10803	-1.10803	-0.147995	PALMD	Homo sapiens palmdelphin (PALMD), mRNA.	54873	chr1	100127854	100127914
A_16_P15232758	0.00381018	8.59345e-05	down	1.10705	-1.10705	-0.146718	PALMD	Homo sapiens palmdelphin (PALMD), mRNA.	54873	chr1	100135743	100135803
A_16_P00132771	0.0486394	0.00709079	down	1.09129	-1.09129	-0.126036	PALMD	Homo sapiens palmdelphin (PALMD), mRNA.	54873	chr1	100144740	100144800
A_16_P00001853	0.00796057	0.000327657	up	1.38336	1.38336	0.468172	PANK4	Homo sapiens pantothenate kinase 4 (PANK4), mRNA.	55229	chr1	2440191	2440251
A_16_P00001865	0.0186711	0.00143354	down	1.33227	-1.33227	-0.413882	PANK4	Homo sapiens pantothenate kinase 4 (PANK4), mRNA.	55229	chr1	2445434	2445481
A_14_P113662	0.0380994	0.00472681	up	1.151	1.151	0.202883	PAPPA2	Homo sapiens pappalysin 2 (PAPPA2), transcript variant 2, mRNA.	60676	chr1	176587206	176587266
A_16_P15352040	0.00121975	9.4472e-06	up	1.17633	1.17633	0.234288	PAPPA2	Homo sapiens pappalysin 2 (PAPPA2), transcript variant 1, mRNA.	60676	chr1	176680932	176680992
A_16_P15351683	0.00271983	4.62715e-05	up	1.27134	1.27134	0.346355	PAPPA2	Homo sapiens pappalysin 2 (PAPPA2), transcript variant 2, mRNA.	60676	chr1	176542837	176542897
A_16_P00197642	0.0422732	0.00561802	down	1.10528	-1.10528	-0.144411	PAPPA2	Homo sapiens pappalysin 2 (PAPPA2), transcript variant 2, mRNA.	60676	chr1	176572352	176572412
A_16_P00197518	0.0433107	0.0058633	up	1.10859	1.10859	0.148732	PAPPA2	Homo sapiens pappalysin 2 (PAPPA2), transcript variant 2, mRNA.	60676	chr1	176500081	176500141
A_16_P00197755	0.00496116	0.000139737	up	1.12859	1.12859	0.174525	PAPPA2	Homo sapiens pappalysin 2 (PAPPA2), transcript variant 2, mRNA.	60676	chr1	176653029	176653089
A_14_P107178	0.0233508	0.00209655	down	1.1025	-1.1025	-0.140781	PAQR7	Homo sapiens progestin and adipoQ receptor family member VII (PAQR7), mRNA.	164091	chr1	26193851	26193911
A_14_P123914	0.0035116	7.42952e-05	up	1.24646	1.24646	0.317835	PAX7	Homo sapiens paired box 7 (PAX7), transcript variant 1, mRNA.	5081	chr1	19011184	19011244
A_14_P101490	0.0113969	0.000614846	down	1.3817	-1.3817	-0.466442	PAX7	Homo sapiens paired box 7 (PAX7), transcript variant 1, mRNA.	5081	chr1	18957564	18957624
A_14_P101348	0.00450789	0.000117884	down	1.1369	-1.1369	-0.185104	PAX7	Homo sapiens paired box 7 (PAX7), transcript variant 1, mRNA.	5081	chr1	19035870	19035930
A_16_P15324561	0.00693312	0.00025701	up	1.288	1.288	0.365137	PBX1	Homo sapiens pre-B-cell leukemia homeobox 1 (PBX1), mRNA.	5087	chr1	164703272	164703332
A_16_P15324683	0.0346805	0.0040542	up	1.10873	1.10873	0.148909	PBX1	Homo sapiens pre-B-cell leukemia homeobox 1 (PBX1), mRNA.	5087	chr1	164740447	164740507
A_16_P15324036	0.0337869	0.00387867	down	1.11382	-1.11382	-0.155521	PBX1	Homo sapiens pre-B-cell leukemia homeobox 1 (PBX1), mRNA.	5087	chr1	164549320	164549380
A_16_P00181592	0.0155433	0.00104363	up	1.16556	1.16556	0.221026	PBX1	Homo sapiens pre-B-cell leukemia homeobox 1 (PBX1), mRNA.	5087	chr1	164805792	164805852
A_16_P15487441	0.0113969	0.000614846	up	1.17504	1.17504	0.232709	PCNXL2	Homo sapiens pecanex-like 2 (Drosophila) (PCNXL2), transcript variant 1, mRNA.	80003	chr1	233322049	233322109
A_16_P00275995	0.00606379	0.000200845	up	1.19683	1.19683	0.259218	PCNXL2	Homo sapiens pecanex-like 2 (Drosophila) (PCNXL2), transcript variant 1, mRNA.	80003	chr1	233275536	233275596
A_16_P35507222	0.0291367	0.00303081	down	1.10553	-1.10553	-0.144735	PCNXL2	Homo sapiens pecanex-like 2 (Drosophila) (PCNXL2), transcript variant 1, mRNA.	80003	chr1	233201073	233201133
A_16_P15153439	0.00422931	0.000105151	up	1.34045	1.34045	0.422721	PDE4B	Homo sapiens phosphodiesterase 4B, cAMP-specific (phosphodiesterase E4 dunce homolog, Drosophila) (PDE4B), transcript variant d, mRNA.	5142	chr1	66678878	66678938
A_14_P122570	0.0226946	0.00200052	down	1.0858	-1.0858	-0.118759	PDE4B	Homo sapiens phosphodiesterase 4B, cAMP-specific (phosphodiesterase E4 dunce homolog, Drosophila) (PDE4B), transcript variant d, mRNA.	5142	chr1	66685094	66685154
A_14_P114886	0.0132204	0.000793006	up	1.14706	1.14706	0.197945	PDE4B	Homo sapiens phosphodiesterase 4B, cAMP-specific (phosphodiesterase E4 dunce homolog, Drosophila) (PDE4B), transcript variant d, mRNA.	5142	chr1	66497317	66497377
A_16_P35160430	0.0019826	2.44098e-05	down	1.19513	-1.19513	-0.257173	PDE4B	Homo sapiens phosphodiesterase 4B, cAMP-specific (phosphodiesterase E4 dunce homolog, Drosophila) (PDE4B), transcript variant d, mRNA.	5142	chr1	66259869	66259929
A_14_P202374	0.0200468	0.00161638	down	1.07623	-1.07623	-0.105987	PDE4B	Homo sapiens phosphodiesterase 4B, cAMP-specific (phosphodiesterase E4 dunce homolog, Drosophila) (PDE4B), transcript variant d, mRNA.	5142	chr1	66806577	66806637
A_16_P15153774	0.0117414	0.000647184	down	1.13395	-1.13395	-0.181363	PDE4B	Homo sapiens phosphodiesterase 4B, cAMP-specific (phosphodiesterase E4 dunce homolog, Drosophila) (PDE4B), transcript variant d, mRNA.	5142	chr1	66793705	66793765
A_16_P15153135	0.0299319	0.00317112	down	1.06638	-1.06638	-0.0927173	PDE4B	Homo sapiens phosphodiesterase 4B, cAMP-specific (phosphodiesterase E4 dunce homolog, Drosophila) (PDE4B), transcript variant d, mRNA.	5142	chr1	66555550	66555610
A_16_P15152603	0.023028	0.00204802	down	1.12239	-1.12239	-0.166568	PDE4B	Homo sapiens phosphodiesterase 4B, cAMP-specific (phosphodiesterase E4 dunce homolog, Drosophila) (PDE4B), transcript variant d, mRNA.	5142	chr1	66318026	66318086
A_16_P15152813	0.00831134	0.00035499	down	1.10045	-1.10045	-0.138099	PDE4B	Homo sapiens phosphodiesterase 4B, cAMP-specific (phosphodiesterase E4 dunce homolog, Drosophila) (PDE4B), transcript variant d, mRNA.	5142	chr1	66430193	66430253
A_16_P15153067	0.0375783	0.00462491	down	1.06259	-1.06259	-0.0875872	PDE4B	Homo sapiens phosphodiesterase 4B, cAMP-specific (phosphodiesterase E4 dunce homolog, Drosophila) (PDE4B), transcript variant d, mRNA.	5142	chr1	66529879	66529937
A_16_P15152763	0.00993265	0.000487087	down	1.07921	-1.07921	-0.109971	PDE4B	Homo sapiens phosphodiesterase 4B, cAMP-specific (phosphodiesterase E4 dunce homolog, Drosophila) (PDE4B), transcript variant d, mRNA.	5142	chr1	66403436	66403496
A_16_P35161481	0.000849951	4.58538e-06	down	1.15898	-1.15898	-0.21285	PDE4B	Homo sapiens phosphodiesterase 4B, cAMP-specific (phosphodiesterase E4 dunce homolog, Drosophila) (PDE4B), transcript variant d, mRNA.	5142	chr1	66705124	66705184
A_16_P15153238	0.00831134	0.00035499	down	1.08905	-1.08905	-0.123076	PDE4B	Homo sapiens phosphodiesterase 4B, cAMP-specific (phosphodiesterase E4 dunce homolog, Drosophila) (PDE4B), transcript variant d, mRNA.	5142	chr1	66596819	66596879
A_16_P15153122	0.0155433	0.00104363	down	1.0802	-1.0802	-0.111294	PDE4B	Homo sapiens phosphodiesterase 4B, cAMP-specific (phosphodiesterase E4 dunce homolog, Drosophila) (PDE4B), transcript variant d, mRNA.	5142	chr1	66549454	66549514
A_16_P35161242	0.0220936	0.00190855	down	1.10272	-1.10272	-0.141061	PDE4B	Homo sapiens phosphodiesterase 4B, cAMP-specific (phosphodiesterase E4 dunce homolog, Drosophila) (PDE4B), transcript variant d, mRNA.	5142	chr1	66606051	66606111
A_16_P35161165	0.00843639	0.000364565	down	1.09994	-1.09994	-0.137421	PDE4B	Homo sapiens phosphodiesterase 4B, cAMP-specific (phosphodiesterase E4 dunce homolog, Drosophila) (PDE4B), transcript variant d, mRNA.	5142	chr1	66577799	66577859
A_16_P00159259	0.0361183	0.00433104	up	1.06862	1.06862	0.0957553	PDE4DIP	Homo sapiens phosphodiesterase 4D interacting protein (PDE4DIP), transcript variant 1, mRNA.	9659	chr1	144919988	144920048
A_16_P15281911	0.0312139	0.0033927	up	1.1357	1.1357	0.183586	PDE4DIP	Homo sapiens phosphodiesterase 4D interacting protein (PDE4DIP), transcript variant 3, mRNA.	9659	chr1	145015819	145015879
A_14_P133596	0.00251033	3.98099e-05	up	1.30631	1.30631	0.385494	PDIK1L	Homo sapiens PDLIM1 interacting kinase 1 like (PDIK1L), transcript variant 2, non-coding RNA.	149420	chr1	26450937	26450997
A_16_P00032919	0.0366139	0.00442706	up	1.11269	1.11269	0.154055	PDIK1L	Homo sapiens PDLIM1 interacting kinase 1 like (PDIK1L), transcript variant 2, non-coding RNA.	149420	chr1	26439336	26439396
A_16_P15025713	0.0375783	0.00462491	down	1.10222	-1.10222	-0.140406	PEX14	Homo sapiens peroxisomal biogenesis factor 14 (PEX14), mRNA.	5195	chr1	10576304	10576364
A_14_P135931	0.0396677	0.00504481	down	1.06827	-1.06827	-0.0952808	PEX14	Homo sapiens peroxisomal biogenesis factor 14 (PEX14), mRNA.	5195	chr1	10662248	10662308
A_16_P00240830	0.0342432	0.00396555	down	1.16902	-1.16902	-0.225296	PFKFB2	Homo sapiens 6-phosphofructo-2-kinase/fructose-2,6-biphosphatase 2 (PFKFB2), transcript variant 1, mRNA.	5208	chr1	207245831	207245891
A_16_P00271787	0.0396677	0.00504481	up	1.12073	1.12073	0.164443	PGBD5	Homo sapiens piggyBac transposable element derived 5 (PGBD5), mRNA.	79605	chr1	230466259	230466318
A_16_P15147091	0.00525734	0.000156369	down	1.08753	-1.08753	-0.121056	PGM1	Homo sapiens phosphoglucomutase 1 (PGM1), mRNA.	5236	chr1	64084072	64084132
A_14_P108033	0.0356416	0.00423691	down	1.0919	-1.0919	-0.126839	PGM1	Homo sapiens phosphoglucomutase 1 (PGM1), mRNA.	5236	chr1	64125396	64125456
A_16_P00081801	0.0291367	0.00303081	down	1.0765	-1.0765	-0.106344	PGM1	Homo sapiens phosphoglucomutase 1 (PGM1), mRNA.	5236	chr1	64107868	64107928
A_16_P15078046	0.0456356	0.00638302	up	1.11826	1.11826	0.161255	PHC2	Homo sapiens polyhomeotic homolog 2 (Drosophila) (PHC2), transcript variant 2, mRNA.	1912	chr1	33803405	33803465
A_14_P127925	0.0462323	0.00651927	up	1.07772	1.07772	0.107988	PHF13	Homo sapiens PHD finger protein 13 (PHF13), mRNA.	148479	chr1	6684028	6684086
A_14_P123682	0.0197544	0.00157818	down	1.16728	-1.16728	-0.223147	PHLDA3	Homo sapiens pleckstrin homology-like domain, family A, member 3 (PHLDA3), mRNA.	23612	chr1	201436945	201437005
A_14_P137088	0.00154214	1.52655e-05	down	1.12086	-1.12086	-0.1646	PHTF1	Homo sapiens putative homeodomain transcription factor 1 (PHTF1), mRNA.	10745	chr1	114248472	114248532
A_16_P00150652	0.016217	0.00112372	up	1.11637	1.11637	0.158812	PHTF1	Homo sapiens putative homeodomain transcription factor 1 (PHTF1), mRNA.	10745	chr1	114288851	114288911
A_16_P15178722	0.0110621	0.000584017	up	1.17687	1.17687	0.234955	PIGK	Homo sapiens phosphatidylinositol glycan anchor biosynthesis, class K (PIGK), mRNA.	10026	chr1	77599241	77599301
A_16_P35187394	0.0312139	0.0033927	down	1.087	-1.087	-0.120348	PIGK	Homo sapiens phosphatidylinositol glycan anchor biosynthesis, class K (PIGK), mRNA.	10026	chr1	77683567	77683627
A_16_P15178622	0.00737732	0.000286434	up	1.24777	1.24777	0.319352	PIGK	Homo sapiens phosphatidylinositol glycan anchor biosynthesis, class K (PIGK), mRNA.	10026	chr1	77556562	77556622
A_14_P111495	0.0422732	0.00561802	up	1.15926	1.15926	0.213207	PIGK	Homo sapiens phosphatidylinositol glycan anchor biosynthesis, class K (PIGK), mRNA.	10026	chr1	77587976	77588033
A_16_P15418631	0.00663109	0.000236828	up	1.13272	1.13272	0.179786	PIK3C2B	Homo sapiens phosphoinositide-3-kinase, class 2, beta polypeptide (PIK3C2B), mRNA.	5287	chr1	204450075	204450135
A_16_P00237168	0.0057769	0.000184844	up	1.28423	1.28423	0.360906	PIK3C2B	Homo sapiens phosphoinositide-3-kinase, class 2, beta polypeptide (PIK3C2B), mRNA.	5287	chr1	204438195	204438255
A_14_P131532	0.0171518	0.00123935	up	1.14041	1.14041	0.189548	PIK3CD	Homo sapiens phosphoinositide-3-kinase, catalytic, delta polypeptide (PIK3CD), mRNA.	5293	chr1	9771519	9771579
A_16_P00012098	0.0433107	0.0058633	up	1.09798	1.09798	0.134849	PIK3CD	Homo sapiens phosphoinositide-3-kinase, catalytic, delta polypeptide (PIK3CD), mRNA.	5293	chr1	9729811	9729871
A_16_P35113285	0.0283729	0.00289619	up	1.14248	1.14248	0.192164	PIK3R3	Homo sapiens phosphoinositide-3-kinase, regulatory subunit 3 (gamma) (PIK3R3), transcript variant 1, mRNA.	8503	chr1	46546271	46546331
A_16_P15293579	0.0480379	0.00694384	up	1.1018	1.1018	0.139862	PIP5K1A	Homo sapiens phosphatidylinositol-4-phosphate 5-kinase, type I, alpha (PIP5K1A), transcript variant 3, mRNA.	8394	chr1	151193954	151194014
A_16_P00163501	0.016217	0.00112372	up	1.09878	1.09878	0.135907	PIP5K1A	Homo sapiens phosphatidylinositol-4-phosphate 5-kinase, type I, alpha (PIP5K1A), transcript variant 3, mRNA.	8394	chr1	151220281	151220341
A_16_P00117566	0.00882591	0.000394759	down	1.10915	-1.10915	-0.149456	PKN2	Homo sapiens protein kinase N2 (PKN2), mRNA.	5586	chr1	89226010	89226070
A_14_P100308	0.0164415	0.00115165	down	1.1031	-1.1031	-0.141559	PKN2	Homo sapiens protein kinase N2 (PKN2), mRNA.	5586	chr1	89206701	89206761
A_16_P35216490	0.0264735	0.00258318	up	1.07969	1.07969	0.110615	PKN2	Homo sapiens protein kinase N2 (PKN2), mRNA.	5586	chr1	89273199	89273259
A_14_P120270	0.0037506	8.3477e-05	down	1.15538	-1.15538	-0.208367	PKN2	Homo sapiens protein kinase N2 (PKN2), mRNA.	5586	chr1	89177032	89177092
A_16_P15207293	0.0371031	0.00452501	down	1.0783	-1.0783	-0.108756	PKN2	Homo sapiens protein kinase N2 (PKN2), mRNA.	5586	chr1	89189519	89189579
A_16_P15376872	0.0356416	0.00423691	up	1.24883	1.24883	0.320577	PLA2G4A	Homo sapiens phospholipase A2, group IVA (cytosolic, calcium-dependent) (PLA2G4A), mRNA.	5321	chr1	186900197	186900257
A_14_P134547	0.00437113	0.000111346	up	1.20165	1.20165	0.265023	PLA2G4A	Homo sapiens phospholipase A2, group IVA (cytosolic, calcium-dependent) (PLA2G4A), mRNA.	5321	chr1	186823418	186823478
A_16_P00001814	0.0233508	0.00209655	down	1.09906	-1.09906	-0.136271	PLCH2	Homo sapiens phospholipase C, eta 2 (PLCH2), mRNA.	9651	chr1	2420002	2420062
A_16_P00289024	0.0211963	0.00177786	up	1.14302	1.14302	0.192851	PLD5	Homo sapiens phospholipase D family, member 5 (PLD5), mRNA.	200150	chr1	242264007	242264067
A_16_P00289121	0.0307738	0.00331732	up	1.14344	1.14344	0.193386	PLD5	Homo sapiens phospholipase D family, member 5 (PLD5), mRNA.	200150	chr1	242341750	242341810
A_16_P15510296	0.0380994	0.00472681	up	1.13004	1.13004	0.176373	PLD5	Homo sapiens phospholipase D family, member 5 (PLD5), mRNA.	200150	chr1	242603763	242603823
A_16_P00289255	0.000175467	2.49759e-08	up	1.74264	1.74264	0.801274	PLD5	Homo sapiens phospholipase D family, member 5 (PLD5), mRNA.	200150	chr1	242470159	242470219
A_16_P15510187	0.0468282	0.00665813	up	1.12565	1.12565	0.170757	PLD5	Homo sapiens phospholipase D family, member 5 (PLD5), mRNA.	200150	chr1	242561689	242561749
A_16_P15001775	0.0444695	0.0061182	down	1.1186	-1.1186	-0.161693	PLEKHN1	Homo sapiens pleckstrin homology domain containing, family N member 1 (PLEKHN1), transcript variant 2, mRNA.	84069	chr1	904551	904605
A_14_P100293	0.0268252	0.00264319	up	1.12524	1.12524	0.170231	PLK3	Homo sapiens polo-like kinase 3 (Drosophila) (PLK3), mRNA.	1263	chr1	45269859	45269910
A_16_P35445690	0.0279629	0.00283095	down	1.1281	-1.1281	-0.173889	PLXNA2	Homo sapiens plexin A2 (PLXNA2), mRNA.	5362	chr1	208264691	208264751
A_16_P00242363	0.0406627	0.00526743	down	1.10601	-1.10601	-0.145369	PLXNA2	Homo sapiens plexin A2 (PLXNA2), mRNA.	5362	chr1	208339421	208339481
A_14_P107008	0.0057769	0.000184844	down	1.17853	-1.17853	-0.236986	PLXNA2	Homo sapiens plexin A2 (PLXNA2), mRNA.	5362	chr1	208400818	208400878
A_14_P137731	0.0480379	0.00694384	up	1.09772	1.09772	0.134506	PM20D1	Homo sapiens peptidase M20 domain containing 1 (PM20D1), mRNA.	148811	chr1	205797148	205797208
A_16_P15294110	0.00458886	0.000121287	up	1.14861	1.14861	0.199894	POGZ	Homo sapiens pogo transposable element with ZNF domain (POGZ), transcript variant 1, mRNA.	23126	chr1	151427908	151427968
A_16_P15330782	0.00693312	0.00025701	up	1.15298	1.15298	0.205364	POU2F1	Homo sapiens POU class 2 homeobox 1 (POU2F1), mRNA.	5451	chr1	167285718	167285778
A_16_P15330997	0.00819132	0.00034565	up	1.22065	1.22065	0.287653	POU2F1	Homo sapiens POU class 2 homeobox 1 (POU2F1), mRNA.	5451	chr1	167372284	167372344
A_16_P00071399	0.00560299	0.00017485	down	1.07346	-1.07346	-0.102268	PPAP2B	Homo sapiens phosphatidic acid phosphatase type 2B (PPAP2B), transcript variant 1, mRNA.	8613	chr1	57018807	57018867
A_14_P126602	0.0142069	0.000899058	down	1.5063	-1.5063	-0.591011	PPAP2B	Homo sapiens phosphatidic acid phosphatase type 2B (PPAP2B), transcript variant 1, mRNA.	8613	chr1	57027890	57027950
A_16_P15413253	0.0197544	0.00157818	up	1.15162	1.15162	0.20367	PPP1R12B	Homo sapiens protein phosphatase 1, regulatory (inhibitor) subunit 12B (PPP1R12B), transcript variant 5, mRNA.	4660	chr1	202346830	202346890
A_16_P15066426	0.0200468	0.00161638	up	1.15541	1.15541	0.208408	PPP1R8	Homo sapiens protein phosphatase 1, regulatory (inhibitor) subunit 8 (PPP1R8), transcript variant 3, mRNA.	5511	chr1	28162801	28162861
A_14_P104430	0.0192154	0.00150426	up	1.10208	1.10208	0.140228	PPT1	Homo sapiens palmitoyl-protein thioesterase 1 (PPT1), transcript variant 1, mRNA.	5538	chr1	40538556	40538616
A_16_P00050623	0.0366139	0.00442706	up	1.10672	1.10672	0.146288	PPT1	Homo sapiens palmitoyl-protein thioesterase 1 (PPT1), transcript variant 1, mRNA.	5538	chr1	40552103	40552163
A_16_P00002775	0.0275847	0.00276705	up	1.30876	1.30876	0.388201	PRDM16	Homo sapiens PR domain containing 16 (PRDM16), transcript variant 1, mRNA.	63976	chr1	3120918	3120978
A_16_P35008202	0.0159859	0.00109641	down	1.18554	-1.18554	-0.245543	PRDM16	Homo sapiens PR domain containing 16 (PRDM16), transcript variant 1, mRNA.	63976	chr1	3080834	3080894
A_16_P00002805	0.0346805	0.0040542	down	1.09316	-1.09316	-0.128502	PRDM16	Homo sapiens PR domain containing 16 (PRDM16), transcript variant 1, mRNA.	63976	chr1	3134824	3134884
A_16_P15007875	0.0211963	0.00177786	down	1.07795	-1.07795	-0.108285	PRDM16	Homo sapiens PR domain containing 16 (PRDM16), transcript variant 1, mRNA.	63976	chr1	3196625	3196685
A_16_P15105621	0.0328606	0.00371007	up	1.26728	1.26728	0.341733	PRDX1	Homo sapiens peroxiredoxin 1 (PRDX1), transcript variant 1, mRNA.	5052	chr1	45980308	45980368
A_14_P124892	0.00392519	9.10562e-05	up	1.15874	1.15874	0.212552	PRDX1	Homo sapiens peroxiredoxin 1 (PRDX1), transcript variant 1, mRNA.	5052	chr1	45986615	45986675
A_14_P134402	0.0283729	0.00289619	down	1.09883	-1.09883	-0.135965	PRKACB	Homo sapiens protein kinase, cAMP-dependent, catalytic, beta (PRKACB), transcript variant 3, mRNA.	5567	chr1	84647900	84647960
A_14_P110390	0.0474384	0.00679964	down	1.0884	-1.0884	-0.12221	PRKACB	Homo sapiens protein kinase, cAMP-dependent, catalytic, beta (PRKACB), transcript variant 2, mRNA.	5567	chr1	84702459	84702519
A_16_P15196127	0.0108926	0.000569148	down	1.15661	-1.15661	-0.209905	PRKACB	Homo sapiens protein kinase, cAMP-dependent, catalytic, beta (PRKACB), transcript variant 3, mRNA.	5567	chr1	84621509	84621569
A_16_P15196023	0.00218735	3.02787e-05	down	1.14924	-1.14924	-0.200682	PRKACB	Homo sapiens protein kinase, cAMP-dependent, catalytic, beta (PRKACB), transcript variant 3, mRNA.	5567	chr1	84561998	84562058
A_14_P110579	0.0261198	0.00252442	down	1.09052	-1.09052	-0.125015	PRKACB	Homo sapiens protein kinase, cAMP-dependent, catalytic, beta (PRKACB), transcript variant 3, mRNA.	5567	chr1	84554018	84554078
A_16_P15196060	0.0351611	0.00414464	down	1.07702	-1.07702	-0.107045	PRKACB	Homo sapiens protein kinase, cAMP-dependent, catalytic, beta (PRKACB), transcript variant 3, mRNA.	5567	chr1	84585511	84585571
A_14_P132087	0.0178973	0.00133319	up	1.10926	1.10926	0.149602	PRPF3	Homo sapiens PRP3 pre-mRNA processing factor 3 homolog (S. cerevisiae) (PRPF3), mRNA.	9129	chr1	150297551	150297610
A_14_P133049	0.0189459	0.00146851	up	1.11287	1.11287	0.154279	PSMB4	Homo sapiens proteasome (prosome, macropain) subunit, beta type, 4 (PSMB4), mRNA.	5692	chr1	151373030	151373084
A_16_P15164556	0.0486394	0.00709079	down	1.06669	-1.06669	-0.0931393	PTGER3	Homo sapiens prostaglandin E receptor 3 (subtype EP3) (PTGER3), transcript variant 4, mRNA.	5733	chr1	71509236	71509296
A_16_P15164444	0.0211963	0.00177786	down	1.07361	-1.07361	-0.102465	PTGER3	Homo sapiens prostaglandin E receptor 3 (subtype EP3) (PTGER3), transcript variant 4, mRNA.	5733	chr1	71471134	71471194
A_16_P00091944	0.0176383	0.0013012	down	1.06631	-1.06631	-0.0926334	PTGER3	Homo sapiens prostaglandin E receptor 3 (subtype EP3) (PTGER3), transcript variant 4, mRNA.	5733	chr1	71372715	71372775
A_16_P15164203	0.00112248	8.03191e-06	down	1.13354	-1.13354	-0.180831	PTGER3	Homo sapiens prostaglandin E receptor 3 (subtype EP3) (PTGER3), transcript variant 4, mRNA.	5733	chr1	71381284	71381344
A_16_P15164363	0.00672488	0.000243384	down	1.11424	-1.11424	-0.156057	PTGER3	Homo sapiens prostaglandin E receptor 3 (subtype EP3) (PTGER3), transcript variant 4, mRNA.	5733	chr1	71444639	71444699
A_16_P00091902	0.0132204	0.000793006	down	1.08236	-1.08236	-0.114176	PTGER3	Homo sapiens prostaglandin E receptor 3 (subtype EP3) (PTGER3), transcript variant 4, mRNA.	5733	chr1	71349399	71349459
A_16_P00091989	0.0104243	0.00052663	down	1.08685	-1.08685	-0.120151	PTGER3	Homo sapiens prostaglandin E receptor 3 (subtype EP3) (PTGER3), transcript variant 4, mRNA.	5733	chr1	71410578	71410638
A_14_P122256	0.0356416	0.00423691	down	1.09043	-1.09043	-0.124894	PTGFR	Homo sapiens prostaglandin F receptor (FP) (PTGFR), transcript variant 1, mRNA.	5737	chr1	78967176	78967236
A_16_P35190572	0.0380994	0.00472681	up	1.08536	1.08536	0.118174	PTGFR	Homo sapiens prostaglandin F receptor (FP) (PTGFR), transcript variant 1, mRNA.	5737	chr1	78984901	78984961
A_16_P00154777	0.0312139	0.0033927	down	1.11612	-1.11612	-0.158488	PTGFRN	Homo sapiens prostaglandin F2 receptor negative regulator (PTGFRN), mRNA.	5738	chr1	117504108	117504168
A_14_P111960	0.0417366	0.00549888	down	1.07778	-1.07778	-0.108062	PTGFRN	Homo sapiens prostaglandin F2 receptor negative regulator (PTGFRN), mRNA.	5738	chr1	117492627	117492687
A_14_P119570	0.0361183	0.00433104	up	1.10497	1.10497	0.144003	PTGS2	Homo sapiens prostaglandin-endoperoxide synthase 2 (prostaglandin G/H synthase and cyclooxygenase) (PTGS2), mRNA.	5743	chr1	186645211	186645271
A_16_P35079795	0.0312139	0.0033927	up	1.15536	1.15536	0.208339	PTP4A2	Homo sapiens protein tyrosine phosphatase type IVA, member 2 (PTP4A2), transcript variant 1, mRNA.	8073	chr1	32384383	32384443
A_14_P116682	0.00923183	0.000427277	up	1.20517	1.20517	0.269232	PTPN14	Homo sapiens protein tyrosine phosphatase, non-receptor type 14 (PTPN14), mRNA.	5784	chr1	214654980	214655040
A_16_P00251490	0.0233508	0.00209655	up	1.12608	1.12608	0.171308	PTPN14	Homo sapiens protein tyrosine phosphatase, non-receptor type 14 (PTPN14), mRNA.	5784	chr1	214613206	214613266
A_16_P00150805	0.0468282	0.00665813	up	1.08501	1.08501	0.11771	PTPN22	Homo sapiens protein tyrosine phosphatase, non-receptor type 22 (lymphoid) (PTPN22), transcript variant 1, mRNA.	26191	chr1	114397627	114397687
A_14_P106385	0.0117414	0.000647184	down	1.16066	-1.16066	-0.214949	PTPN22	Homo sapiens protein tyrosine phosphatase, non-receptor type 22 (lymphoid) (PTPN22), transcript variant 1, mRNA.	26191	chr1	114412436	114412496
A_14_P135162	0.0257585	0.00246688	up	1.12688	1.12688	0.172336	PTPRU	Homo sapiens protein tyrosine phosphatase, receptor type, U (PTPRU), transcript variant 3, mRNA.	10076	chr1	29633614	29633673
A_16_P00036552	0.0171518	0.00123935	up	1.15661	1.15661	0.209899	PTPRU	Homo sapiens protein tyrosine phosphatase, receptor type, U (PTPRU), transcript variant 3, mRNA.	10076	chr1	29619201	29619261
A_14_P112166	0.00144174	1.34457e-05	up	1.21175	1.21175	0.277089	PUM1	Homo sapiens pumilio homolog 1 (Drosophila) (PUM1), transcript variant 1, mRNA.	9698	chr1	31500929	31500989
A_16_P15073020	0.00542561	0.000165367	up	1.22536	1.22536	0.293202	PUM1	Homo sapiens pumilio homolog 1 (Drosophila) (PUM1), transcript variant 1, mRNA.	9698	chr1	31436184	31436244
A_14_P127546	0.00437113	0.000111346	up	1.17258	1.17258	0.229686	RAB25	Homo sapiens RAB25, member RAS oncogene family (RAB25), mRNA.	57111	chr1	156035276	156035336
A_16_P00065271	0.00167718	1.78718e-05	up	1.20486	1.20486	0.268862	RAB3B	Homo sapiens RAB3B, member RAS oncogene family (RAB3B), mRNA.	5865	chr1	52413282	52413342
A_14_P101981	0.0474384	0.00679964	down	1.08373	-1.08373	-0.116006	RAB3GAP2	Homo sapiens RAB3 GTPase activating protein subunit 2 (non-catalytic) (RAB3GAP2), mRNA.	25782	chr1	220386250	220386310
A_16_P15457365	0.0324585	0.00362829	down	1.12654	-1.12654	-0.171898	RAB3GAP2	Homo sapiens RAB3 GTPase activating protein subunit 2 (non-catalytic) (RAB3GAP2), mRNA.	25782	chr1	220344158	220344218
A_14_P129325	0.0159859	0.00109641	up	1.20263	1.20263	0.266188	RAB3GAP2	Homo sapiens RAB3 GTPase activating protein subunit 2 (non-catalytic) (RAB3GAP2), mRNA.	25782	chr1	220437912	220437972
A_16_P15347041	0.00049627	1.48601e-06	up	1.48013	1.48013	0.565725	RABGAP1L	Homo sapiens RAB GTPase activating protein 1-like (RABGAP1L), transcript variant 1, mRNA.	9910	chr1	174556630	174556690
A_16_P00194650	0.0142069	0.000899058	up	1.17393	1.17393	0.231347	RABGAP1L	Homo sapiens RAB GTPase activating protein 1-like (RABGAP1L), transcript variant 1, mRNA.	9910	chr1	174439156	174439216
A_16_P15347771	0.00458886	0.000121287	up	1.15209	1.15209	0.204257	RABGAP1L	Homo sapiens RAB GTPase activating protein 1-like (RABGAP1L), transcript variant 1, mRNA.	9910	chr1	174914337	174914397
A_16_P15347498	0.0253887	0.00241054	up	1.16146	1.16146	0.215936	RABGAP1L	Homo sapiens RAB GTPase activating protein 1-like (RABGAP1L), transcript variant 1, mRNA.	9910	chr1	174794373	174794433
A_16_P15347131	0.00936608	0.00043866	up	1.21746	1.21746	0.283869	RABGAP1L	Homo sapiens RAB GTPase activating protein 1-like (RABGAP1L), transcript variant 1, mRNA.	9910	chr1	174630505	174630565
A_14_P138772	0.0307738	0.00331732	up	1.13673	1.13673	0.184895	RAG1AP1	Homo sapiens recombination activating gene 1 activating protein 1 (RAG1AP1), transcript variant 2, mRNA.	55974	chr1	155111263	155111323
A_14_P129938	0.0169113	0.00120946	up	1.12284	1.12284	0.167148	RALGPS2	Homo sapiens Ral GEF with PH domain and SH3 binding motif 2 (RALGPS2), mRNA.	55103	chr1	178777212	178777272
A_14_P131017	0.0157533	0.00106972	up	1.19766	1.19766	0.260213	RALGPS2	Homo sapiens Ral GEF with PH domain and SH3 binding motif 2 (RALGPS2), mRNA.	55103	chr1	178855219	178855279
A_14_P136537	0.00161875	1.67822e-05	up	1.2271	1.2271	0.29525	RALGPS2	Homo sapiens Ral GEF with PH domain and SH3 binding motif 2 (RALGPS2), mRNA.	55103	chr1	178802653	178802713
A_16_P15259482	0.0200468	0.00161638	up	1.28209	1.28209	0.358495	RAP1A	Homo sapiens RAP1A, member of RAS oncogene family (RAP1A), transcript variant 1, mRNA.	5906	chr1	112188900	112188960
A_14_P127026	0.0243671	0.00224853	down	1.06829	-1.06829	-0.0953073	RAP1A	Homo sapiens RAP1A, member of RAS oncogene family (RAP1A), transcript variant 1, mRNA.	5906	chr1	112165503	112165563
A_16_P00147944	0.00404177	9.64654e-05	up	1.2862	1.2862	0.363114	RAP1A	Homo sapiens RAP1A, member of RAS oncogene family (RAP1A), transcript variant 1, mRNA.	5906	chr1	112252212	112252272
A_16_P00027345	0.00195198	2.36655e-05	up	1.13302	1.13302	0.180177	RAP1GAP	Homo sapiens RAP1 GTPase activating protein (RAP1GAP), transcript variant 1, mRNA.	5909	chr1	21966814	21966866
A_16_P35371679	0.0126753	0.000735076	down	1.12206	-1.12206	-0.166149	RASAL2	Homo sapiens RAS protein activator like 2 (RASAL2), transcript variant 2, mRNA.	9462	chr1	178173775	178173835
A_16_P15356013	0.0391604	0.00493672	up	1.08178	1.08178	0.113412	RASAL2	Homo sapiens RAS protein activator like 2 (RASAL2), transcript variant 2, mRNA.	9462	chr1	178252650	178252710
A_16_P15356328	0.0492988	0.00724052	up	1.09465	1.09465	0.130471	RASAL2	Homo sapiens RAS protein activator like 2 (RASAL2), transcript variant 2, mRNA.	9462	chr1	178388758	178388818
A_16_P35371463	0.0401437	0.00515504	down	1.09702	-1.09702	-0.133588	RASAL2	Homo sapiens RAS protein activator like 2 (RASAL2), transcript variant 2, mRNA.	9462	chr1	178071049	178071109
A_16_P00200203	0.00717344	0.000271349	up	1.16135	1.16135	0.2158	RASAL2	Homo sapiens RAS protein activator like 2 (RASAL2), transcript variant 2, mRNA.	9462	chr1	178213100	178213160
A_16_P35371750	0.0261198	0.00252442	up	1.11169	1.11169	0.152756	RASAL2	Homo sapiens RAS protein activator like 2 (RASAL2), transcript variant 2, mRNA.	9462	chr1	178205556	178205616
A_16_P35361485	0.0159859	0.00109641	up	1.14217	1.14217	0.191777	RC3H1	Homo sapiens ring finger and CCCH-type zinc finger domains 1 (RC3H1), mRNA.	149041	chr1	173949913	173949973
A_14_P135295	0.00908792	0.000416169	down	1.47748	-1.47748	-0.563143	RCOR3	Homo sapiens REST corepressor 3 (RCOR3), transcript variant 3, mRNA.	55758	chr1	211433482	211433541
A_16_P35346787	0.0275847	0.00276705	up	1.12265	1.12265	0.166907	RCSD1	Homo sapiens RCSD domain containing 1 (RCSD1), mRNA.	92241	chr1	167663290	167663350
A_14_P114536	0.0214998	0.00182048	up	1.13859	1.13859	0.187246	RFWD2	Homo sapiens ring finger and WD repeat domain 2 (RFWD2), transcript variant 2, mRNA.	64326	chr1	175995228	175995288
A_16_P15350751	0.00398274	9.37239e-05	up	1.18994	1.18994	0.250883	RFWD2	Homo sapiens ring finger and WD repeat domain 2 (RFWD2), transcript variant 2, mRNA.	64326	chr1	176073135	176073195
A_16_P15350808	0.0279629	0.00283095	up	1.13516	1.13516	0.18289	RFWD2	Homo sapiens ring finger and WD repeat domain 2 (RFWD2), transcript variant 2, mRNA.	64326	chr1	176098979	176099039
A_16_P00197016	0.0316176	0.00346964	up	1.12731	1.12731	0.17289	RFWD2	Homo sapiens ring finger and WD repeat domain 2 (RFWD2), transcript variant 2, mRNA.	64326	chr1	176039161	176039221
A_16_P35385139	0.0014143	1.30242e-05	up	1.18147	1.18147	0.240578	RGL1	Homo sapiens ral guanine nucleotide dissociation stimulator-like 1 (RGL1), mRNA.	23179	chr1	183617567	183617627
A_16_P35385439	0.00345408	7.21537e-05	up	1.22069	1.22069	0.287701	RGL1	Homo sapiens ral guanine nucleotide dissociation stimulator-like 1 (RGL1), mRNA.	23179	chr1	183769216	183769276
A_16_P00207869	0.00796057	0.000327657	up	1.1405	1.1405	0.18966	RGL1	Homo sapiens ral guanine nucleotide dissociation stimulator-like 1 (RGL1), mRNA.	23179	chr1	183740218	183740278
A_14_P202511	0.00819132	0.00034565	down	1.12095	-1.12095	-0.164728	RGS1	Homo sapiens regulator of G-protein signaling 1 (RGS1), mRNA.	5996	chr1	192547441	192547501
A_16_P35406677	0.00936608	0.00043866	up	1.12242	1.12242	0.166617	RGS13	Homo sapiens regulator of G-protein signaling 13 (RGS13), transcript variant 1, mRNA.	6003	chr1	192618869	192618929
A_16_P35406713	0.0428059	0.00573948	down	1.09837	-1.09837	-0.135364	RGS13	Homo sapiens regulator of G-protein signaling 13 (RGS13), transcript variant 1, mRNA.	6003	chr1	192629319	192629379
A_14_P100951	0.0164415	0.00115165	up	1.12463	1.12463	0.169455	RGS16	Homo sapiens regulator of G-protein signaling 16 (RGS16), mRNA.	6004	chr1	182567850	182567910
A_16_P15389013	0.0220936	0.00190855	down	1.12569	-1.12569	-0.170805	RGS21	Homo sapiens regulator of G-protein signaling 21 (RGS21), mRNA.	431704	chr1	192298363	192298423
A_14_P129400	0.0287592	0.00296281	up	1.12812	1.12812	0.173916	RGS5	Homo sapiens regulator of G-protein signaling 5 (RGS5), mRNA.	8490	chr1	163117070	163117130
A_16_P15507656	0.013608	0.000833951	up	1.17275	1.17275	0.229892	RGS7	Homo sapiens regulator of G-protein signaling 7 (RGS7), mRNA.	6000	chr1	241492407	241492467
A_16_P00287975	0.0226946	0.00200052	up	1.14395	1.14395	0.194025	RGS7	Homo sapiens regulator of G-protein signaling 7 (RGS7), mRNA.	6000	chr1	241504406	241504466
A_16_P15506837	0.0450598	0.00624935	down	1.12379	-1.12379	-0.168376	RGS7	Homo sapiens regulator of G-protein signaling 7 (RGS7), mRNA.	6000	chr1	241178060	241178120
A_16_P15506802	0.0275847	0.00276705	up	1.19989	1.19989	0.262906	RGS7	Homo sapiens regulator of G-protein signaling 7 (RGS7), mRNA.	6000	chr1	241163813	241163873
A_16_P00287728	0.0192154	0.00150426	up	1.19042	1.19042	0.251476	RGS7	Homo sapiens regulator of G-protein signaling 7 (RGS7), mRNA.	6000	chr1	241337269	241337329
A_14_P126683	0.0203308	0.00165543	up	1.1843	1.1843	0.24403	RGS7	Homo sapiens regulator of G-protein signaling 7 (RGS7), mRNA.	6000	chr1	241262008	241262068
A_16_P15506849	0.00534202	0.000160808	up	1.1654	1.1654	0.220829	RGS7	Homo sapiens regulator of G-protein signaling 7 (RGS7), mRNA.	6000	chr1	241184827	241184887
A_16_P00205934	0.0295122	0.00310024	up	1.12845	1.12845	0.174338	RGSL1	Homo sapiens regulator of G-protein signaling like 1 (RGSL1), mRNA.	353299	chr1	182443145	182443205
A_14_P130802	0.0316176	0.00346964	up	1.06424	1.06424	0.0898246	RHBDL2	Homo sapiens rhomboid, veinlet-like 2 (Drosophila) (RHBDL2), mRNA.	54933	chr1	39377075	39377132
A_14_P130411	0.0014143	1.30242e-05	up	1.28157	1.28157	0.357917	RHOU	Homo sapiens ras homolog gene family, member U (RHOU), mRNA.	58480	chr1	228877788	228877848
A_14_P108368	0.0126753	0.000735076	down	1.07841	-1.07841	-0.108903	RIMKLA	Homo sapiens ribosomal modification protein rimK-like family member A (RIMKLA), mRNA.		chr1	42865222	42865275
A_16_P15094026	0.0444695	0.0061182	down	1.112	-1.112	-0.153156	RLF	Homo sapiens rearranged L-myc fusion (RLF), mRNA.	6018	chr1	40690877	40690937
A_14_P135729	0.0119295	0.000663939	up	1.29083	1.29083	0.368301	RLF	Homo sapiens rearranged L-myc fusion (RLF), mRNA.	6018	chr1	40679142	40679202
A_14_P103024	0.00488325	0.000135848	up	1.16841	1.16841	0.224549	RNF19B	Homo sapiens ring finger protein 19B (RNF19B), transcript variant 2, mRNA.	127544	chr1	33415139	33415195
A_16_P00056403	0.0316176	0.00346964	up	1.08823	1.08823	0.12198	RNF220	Homo sapiens ring finger protein 220 (RNF220), mRNA.		chr1	45001278	45001338
A_16_P35251459	0.0115746	0.000630822	down	1.09907	-1.09907	-0.136285	RNPC3	Homo sapiens RNA-binding region (RNP1, RRM) containing 3 (RNPC3), mRNA.	55599	chr1	104072243	104072303
A_16_P15412286	0.00796057	0.000327657	up	1.15299	1.15299	0.205376	RNPEP	Homo sapiens arginyl aminopeptidase (aminopeptidase B) (RNPEP), mRNA.	6051	chr1	201958292	201958352
A_16_P15148071	0.0113969	0.000614846	down	1.11883	-1.11883	-0.161989	ROR1	Homo sapiens receptor tyrosine kinase-like orphan receptor 1 (ROR1), transcript variant 2, mRNA.	4919	chr1	64439665	64439725
A_16_P15147769	0.0261198	0.00252442	down	1.06968	-1.06968	-0.0971772	ROR1	Homo sapiens receptor tyrosine kinase-like orphan receptor 1 (ROR1), transcript variant 2, mRNA.	4919	chr1	64339533	64339593
A_16_P15147865	0.0283729	0.00289619	down	1.08267	-1.08267	-0.11459	ROR1	Homo sapiens receptor tyrosine kinase-like orphan receptor 1 (ROR1), transcript variant 2, mRNA.	4919	chr1	64370926	64370986
A_14_P138431	0.00726985	0.000278796	down	1.09237	-1.09237	-0.127459	ROR1	Homo sapiens receptor tyrosine kinase-like orphan receptor 1 (ROR1), transcript variant 2, mRNA.	4919	chr1	64360281	64360341
A_16_P00082053	0.0444695	0.0061182	up	1.09743	1.09743	0.134125	ROR1	Homo sapiens receptor tyrosine kinase-like orphan receptor 1 (ROR1), transcript variant 2, mRNA.	4919	chr1	64286324	64286384
A_16_P00122245	0.00225773	3.21878e-05	down	1.20475	-1.20475	-0.268728	RPAP2	Homo sapiens RNA polymerase II associated protein 2 (RPAP2), mRNA.	79871	chr1	92781669	92781729
A_14_P111864	0.0287592	0.00296281	down	1.08684	-1.08684	-0.120145	RPAP2	Homo sapiens RNA polymerase II associated protein 2 (RPAP2), mRNA.	79871	chr1	92789082	92789142
A_14_P131134	0.00502757	0.000143731	down	1.08555	-1.08555	-0.118426	RPAP2	Homo sapiens RNA polymerase II associated protein 2 (RPAP2), mRNA.	79871	chr1	92834492	92834552
A_14_P202412	0.00228937	3.31846e-05	down	1.1706	-1.1706	-0.227246	RPE65	Homo sapiens retinal pigment epithelium-specific protein 65kDa (RPE65), mRNA.	6121	chr1	68895331	68895391
A_16_P15291891	0.00663109	0.000236828	up	1.1289	1.1289	0.174921	RPRD2	Homo sapiens regulation of nuclear pre-mRNA domain containing 2 (RPRD2), mRNA.		chr1	150437225	150437285
A_16_P15291835	0.0155433	0.00104363	up	1.12753	1.12753	0.173164	RPRD2	Homo sapiens regulation of nuclear pre-mRNA domain containing 2 (RPRD2), mRNA.		chr1	150401375	150401435
A_16_P00249365	0.0386297	0.00483074	up	1.12666	1.12666	0.172049	RPS6KC1	Homo sapiens ribosomal protein S6 kinase, 52kDa, polypeptide 1 (RPS6KC1), transcript variant 2, mRNA.	26750	chr1	213336435	213336495
A_16_P00049087	0.0468282	0.00665813	up	1.10086	1.10086	0.138636	RRAGC	Homo sapiens Ras-related GTP binding C (RRAGC), mRNA.	64121	chr1	39318023	39318083
A_14_P103284	0.00188657	2.22412e-05	up	1.29645	1.29645	0.374567	RRP15	Homo sapiens ribosomal RNA processing 15 homolog (S. cerevisiae) (RRP15), mRNA.	51018	chr1	218480840	218480900
A_16_P00031677	0.0261198	0.00252442	down	1.07916	-1.07916	-0.109914	RUNX3	Homo sapiens runt-related transcription factor 3 (RUNX3), transcript variant 1, mRNA.	864	chr1	25281517	25281573
A_16_P00031617	0.0391604	0.00493672	up	1.1297	1.1297	0.175935	RUNX3	Homo sapiens runt-related transcription factor 3 (RUNX3), transcript variant 2, mRNA.	864	chr1	25247260	25247320
A_14_P131640	0.0186711	0.00143354	down	1.25719	-1.25719	-0.330204	RWDD3	Homo sapiens RWD domain containing 3 (RWDD3), transcript variant 2, mRNA.	25950	chr1	95700350	95700410
A_16_P15497387	0.0133989	0.00081324	up	1.16432	1.16432	0.21949	RYR2	Homo sapiens ryanodine receptor 2 (cardiac) (RYR2), mRNA.	6262	chr1	237446799	237446859
A_16_P00282427	0.0126753	0.000735076	down	1.12969	-1.12969	-0.17593	RYR2	Homo sapiens ryanodine receptor 2 (cardiac) (RYR2), mRNA.	6262	chr1	237831197	237831257
A_16_P00282643	0.0104243	0.00052663	up	1.18974	1.18974	0.250647	RYR2	Homo sapiens ryanodine receptor 2 (cardiac) (RYR2), mRNA.	6262	chr1	237936907	237936967
A_16_P35517552	0.0146462	0.000945046	up	1.16507	1.16507	0.220411	RYR2	Homo sapiens ryanodine receptor 2 (cardiac) (RYR2), mRNA.	6262	chr1	237323173	237323233
A_16_P00282182	0.0233508	0.00209655	down	1.1488	-1.1488	-0.200131	RYR2	Homo sapiens ryanodine receptor 2 (cardiac) (RYR2), mRNA.	6262	chr1	237670021	237670081
A_16_P15076935	0.0226946	0.00200052	up	1.14693	1.14693	0.197777	S100PBP	Homo sapiens S100P binding protein (S100PBP), transcript variant 1, mRNA.	64766	chr1	33302107	33302167
A_14_P135344	0.0450598	0.00624935	down	1.11147	-1.11147	-0.152466	S1PR1	Homo sapiens sphingosine-1-phosphate receptor 1 (S1PR1), mRNA.	1901	chr1	101704059	101704119
A_16_P15196455	0.0211963	0.00177786	down	1.10728	-1.10728	-0.147025	SAMD13	Homo sapiens sterile alpha motif domain containing 13 (SAMD13), transcript variant 1, mRNA.	148418	chr1	84775289	84775349
A_16_P00133351	0.00182914	2.08987e-05	down	1.15216	-1.15216	-0.204342	SASS6	Homo sapiens spindle assembly 6 homolog (C. elegans) (SASS6), mRNA.	163786	chr1	100587005	100587065
A_16_P35541601	0.0257585	0.00246688	up	1.1118	1.1118	0.152891	SCCPDH	Homo sapiens saccharopine dehydrogenase (putative) (SCCPDH), mRNA.	51097	chr1	246908247	246908307
A_16_P00052030	0.0417366	0.00549888	down	1.07224	-1.07224	-0.100626	SCMH1	Homo sapiens sex comb on midleg homolog 1 (Drosophila) (SCMH1), transcript variant 2, mRNA.	22955	chr1	41691524	41691584
A_16_P15121330	0.00551857	0.000170046	up	1.22353	1.22353	0.291046	SCP2	Homo sapiens sterol carrier protein 2 (SCP2), transcript variant 1, mRNA.	6342	chr1	53510357	53510417
A_16_P35128332	0.00496116	0.000139737	up	1.48544	1.48544	0.570886	SCP2	Homo sapiens sterol carrier protein 2 (SCP2), transcript variant 2, mRNA.	6342	chr1	53420360	53420420
A_16_P15337030	0.0492988	0.00724052	up	1.12522	1.12522	0.17021	SCYL3	Homo sapiens SCY1-like 3 (S. cerevisiae) (SCYL3), transcript variant 1, mRNA.	57147	chr1	169859832	169859892
A_16_P35533067	0.0295122	0.00310024	down	1.12542	-1.12542	-0.170466	SDCCAG8	Homo sapiens serologically defined colon cancer antigen 8 (SDCCAG8), mRNA.	10806	chr1	243493783	243493843
A_14_P134161	0.0226946	0.00200052	up	1.16077	1.16077	0.215077	SDCCAG8	Homo sapiens serologically defined colon cancer antigen 8 (SDCCAG8), mRNA.	10806	chr1	243581337	243581397
A_16_P00290222	0.0236999	0.00214613	down	1.11972	-1.11972	-0.163141	SDCCAG8	Homo sapiens serologically defined colon cancer antigen 8 (SDCCAG8), mRNA.	10806	chr1	243504314	243504374
A_16_P35002760	0.00392519	9.10562e-05	down	1.06851	-1.06851	-0.0956015	SDF4	Homo sapiens stromal cell derived factor 4 (SDF4), transcript variant 2, mRNA.	51150	chr1	1161420	1161465
A_14_P114174	0.000375466	6.81478e-07	up	1.46981	1.46981	0.555633	SDHB	Homo sapiens succinate dehydrogenase complex, subunit B, iron sulfur (Ip) (SDHB), nuclear gene encoding mitochondrial protein, mRNA.	6390	chr1	17345870	17345930
A_14_P118723	0.0107525	0.000554632	up	1.24961	1.24961	0.321478	SDHB	Homo sapiens succinate dehydrogenase complex, subunit B, iron sulfur (Ip) (SDHB), nuclear gene encoding mitochondrial protein, mRNA.	6390	chr1	17371232	17371292
A_14_P121105	0.00473557	0.000128373	up	1.1785	1.1785	0.236952	SDHC	Homo sapiens succinate dehydrogenase complex, subunit C, integral membrane protein, 15kDa (SDHC), nuclear gene encoding mitochondrial protein, transcript variant 2, mRNA.	6391	chr1	161331896	161331956
A_16_P00199815	0.00225773	3.21878e-05	up	1.22016	1.22016	0.28707	SEC16B	Homo sapiens SEC16 homolog B (S. cerevisiae) (SEC16B), mRNA.	89866	chr1	177923133	177923193
A_14_P132506	0.0209055	0.00173615	up	1.09533	1.09533	0.131366	SELE	Homo sapiens selectin E (SELE), mRNA.	6401	chr1	169696853	169696905
A_16_P15304785	0.0226946	0.00200052	up	1.14752	1.14752	0.198525	SEMA4A	Homo sapiens sema domain, immunoglobulin domain (Ig), transmembrane domain (TM) and short cytoplasmic domain, (semaphorin) 4A (SEMA4A), mRNA.	64218	chr1	156126870	156126930
A_14_P107291	0.0412187	0.00538204	up	1.12354	1.12354	0.16805	SEMA4A	Homo sapiens sema domain, immunoglobulin domain (Ig), transmembrane domain (TM) and short cytoplasmic domain, (semaphorin) 4A (SEMA4A), mRNA.	64218	chr1	156132785	156132842
A_14_P106367	0.0194917	0.00154081	down	1.06997	-1.06997	-0.097571	SERBP1	Homo sapiens SERPINE1 mRNA binding protein 1 (SERBP1), transcript variant 1, mRNA.	26135	chr1	67892385	67892445
A_14_P118971	0.00964564	0.000462282	down	1.11241	-1.11241	-0.153689	SERINC2	Homo sapiens serine incorporator 2 (SERINC2), mRNA.	347735	chr1	31897249	31897309
A_14_P128174	0.0233508	0.00209655	up	1.11523	1.11523	0.157345	SERPINC1	Homo sapiens serpin peptidase inhibitor, clade C (antithrombin), member 1 (SERPINC1), mRNA.	462	chr1	173884256	173884316
A_14_P132098	0.0192154	0.00150426	up	1.11123	1.11123	0.152162	SESN2	Homo sapiens sestrin 2 (SESN2), mRNA.	83667	chr1	28596960	28597020
A_16_P15292877	0.0153171	0.00101813	up	1.13276	1.13276	0.179842	SETDB1	Homo sapiens SET domain, bifurcated 1 (SETDB1), transcript variant 1, mRNA.	9869	chr1	150900988	150901048
A_14_P105365	0.0287592	0.00296281	down	1.05185	-1.05185	-0.0729332	SFRS11	Homo sapiens splicing factor, arginine/serine-rich 11 (SFRS11), mRNA.	9295	chr1	70694094	70694150
A_16_P15162758	0.0299319	0.00317112	down	1.06629	-1.06629	-0.092603	SFRS11	Homo sapiens splicing factor, arginine/serine-rich 11 (SFRS11), mRNA.	9295	chr1	70707938	70707998
A_14_P116272	0.00311887	6.04819e-05	up	1.16947	1.16947	0.225854	SFRS4	Homo sapiens splicing factor, arginine/serine-rich 4 (SFRS4), mRNA.	6429	chr1	29481319	29481379
A_16_P00086096	0.00606379	0.000200845	down	1.08924	-1.08924	-0.123328	SGIP1	Homo sapiens SH3-domain GRB2-like (endophilin) interacting protein 1 (SGIP1), mRNA.	84251	chr1	67059134	67059194
A_16_P00086060	0.00606379	0.000200845	down	1.09456	-1.09456	-0.130345	SGIP1	Homo sapiens SH3-domain GRB2-like (endophilin) interacting protein 1 (SGIP1), mRNA.	84251	chr1	67036894	67036954
A_16_P15154795	0.00856655	0.000374381	down	1.07251	-1.07251	-0.100997	SGIP1	Homo sapiens SH3-domain GRB2-like (endophilin) interacting protein 1 (SGIP1), mRNA.	84251	chr1	67182136	67182196
A_14_P109680	0.00156718	1.57559e-05	down	1.12348	-1.12348	-0.167969	SGIP1	Homo sapiens SH3-domain GRB2-like (endophilin) interacting protein 1 (SGIP1), mRNA.	84251	chr1	67148534	67148594
A_16_P35162491	0.00263789	4.35758e-05	down	1.16445	-1.16445	-0.219652	SGIP1	Homo sapiens SH3-domain GRB2-like (endophilin) interacting protein 1 (SGIP1), mRNA.	84251	chr1	67091448	67091508
A_16_P15154869	0.00993265	0.000487087	up	1.14969	1.14969	0.20124	SGIP1	Homo sapiens SH3-domain GRB2-like (endophilin) interacting protein 1 (SGIP1), mRNA.	84251	chr1	67209023	67209083
A_14_P114042	0.00182914	2.08987e-05	down	1.12926	-1.12926	-0.175378	SGIP1	Homo sapiens SH3-domain GRB2-like (endophilin) interacting protein 1 (SGIP1), mRNA.	84251	chr1	67072251	67072311
A_14_P130438	0.0337869	0.00387867	down	1.08416	-1.08416	-0.116579	SH3GLB1	Homo sapiens SH3-domain GRB2-like endophilin B1 (SH3GLB1), mRNA.	51100	chr1	87195735	87195795
A_16_P35505327	0.0375783	0.00462491	up	1.12463	1.12463	0.169448	SIPA1L2	Homo sapiens signal-induced proliferation-associated 1 like 2 (SIPA1L2), mRNA.	57568	chr1	232538085	232538145
A_16_P35505398	0.0328606	0.00371007	up	1.18586	1.18586	0.245929	SIPA1L2	Homo sapiens signal-induced proliferation-associated 1 like 2 (SIPA1L2), mRNA.	57568	chr1	232557282	232557342
A_14_P104756	0.0499507	0.00739309	down	1.10598	-1.10598	-0.145322	SKI	Homo sapiens v-ski sarcoma viral oncogene homolog (avian) (SKI), mRNA.	6497	chr1	2238531	2238591
A_16_P15315126	0.0200468	0.00161638	up	1.18206	1.18206	0.241299	SLAMF1	Homo sapiens signaling lymphocytic activation molecule family member 1 (SLAMF1), mRNA.	6504	chr1	160594999	160595059
A_16_P15314914	0.00869282	0.000384443	up	1.29983	1.29983	0.378325	SLAMF6	Homo sapiens SLAM family member 6 (SLAMF6), mRNA.	114836	chr1	160471144	160471204
A_14_P103440	0.0438892	0.00598953	up	1.07625	1.07625	0.106015	SLAMF8	Homo sapiens SLAM family member 8 (SLAMF8), mRNA.	56833	chr1	159797520	159797580
A_16_P15262507	0.00569236	0.000179782	up	1.16946	1.16946	0.225848	SLC16A1	Homo sapiens solute carrier family 16, member 1 (monocarboxylic acid transporter 1) (SLC16A1), transcript variant 2, mRNA.	6566	chr1	113490994	113491054
A_16_P15336038	0.0412187	0.00538204	up	1.12307	1.12307	0.167442	SLC19A2	Homo sapiens solute carrier family 19 (thiamine transporter), member 2 (SLC19A2), mRNA.	10560	chr1	169452265	169452325
A_16_P15269246	0.00569236	0.000179782	down	1.12323	-1.12323	-0.167653	SLC22A15	Homo sapiens solute carrier family 22, member 15 (SLC22A15), mRNA.	55356	chr1	116552819	116552879
A_16_P15269344	0.0462323	0.00651927	up	1.04943	1.04943	0.069601	SLC22A15	Homo sapiens solute carrier family 22, member 15 (SLC22A15), mRNA.	55356	chr1	116602241	116602301
A_16_P15269216	0.0142069	0.000899058	down	1.13096	-1.13096	-0.17755	SLC22A15	Homo sapiens solute carrier family 22, member 15 (SLC22A15), mRNA.	55356	chr1	116533779	116533839
A_14_P138146	0.0333342	0.00379352	up	1.12286	1.12286	0.167181	SLC22A15	Homo sapiens solute carrier family 22, member 15 (SLC22A15), mRNA.	55356	chr1	116562295	116562355
A_16_P15251425	0.0380994	0.00472681	down	1.07164	-1.07164	-0.0998187	SLC25A24	Homo sapiens solute carrier family 25 (mitochondrial carrier; phosphate carrier), member 24 (SLC25A24), nuclear gene encoding mitochondrial protein, transcript variant 1, mRNA.	29957	chr1	108739550	108739610
A_16_P15023491	0.0417366	0.00549888	up	1.11356	1.11356	0.155183	SLC25A33	Homo sapiens solute carrier family 25, member 33 (SLC25A33), mRNA.	84275	chr1	9610636	9610696
A_16_P00169800	0.0132204	0.000793006	up	1.1577	1.1577	0.211259	SLC25A44	Homo sapiens solute carrier family 25, member 44 (SLC25A44), mRNA.	9673	chr1	156178396	156178456
A_16_P00169793	0.01382	0.000855151	up	1.14695	1.14695	0.197806	SLC25A44	Homo sapiens solute carrier family 25, member 44 (SLC25A44), mRNA.	9673	chr1	156171275	156171335
A_14_P111373	0.0150913	0.000993204	down	1.105	-1.105	-0.144051	SLC26A9	Homo sapiens solute carrier family 26, member 9 (SLC26A9), transcript variant 1, mRNA.	115019	chr1	205902279	205902339
A_14_P127788	0.0223882	0.00195404	up	1.15414	1.15414	0.206822	SLC2A5	Homo sapiens solute carrier family 2 (facilitated glucose/fructose transporter), member 5 (SLC2A5), transcript variant 1, mRNA.	6518	chr1	9124550	9124610
A_16_P15022383	0.0444695	0.0061182	up	1.17513	1.17513	0.23282	SLC2A5	Homo sapiens solute carrier family 2 (facilitated glucose/fructose transporter), member 5 (SLC2A5), transcript variant 3, transcribed RNA.	6518	chr1	9136433	9136493
A_16_P15235539	0.0140134	0.000876849	down	1.10091	-1.10091	-0.138699	SLC30A7	Homo sapiens solute carrier family 30 (zinc transporter), member 7 (SLC30A7), transcript variant 2, mRNA.	148867	chr1	101369407	101369467
A_16_P15235636	0.0366139	0.00442706	down	1.11565	-1.11565	-0.157878	SLC30A7	Homo sapiens solute carrier family 30 (zinc transporter), member 7 (SLC30A7), transcript variant 2, mRNA.	148867	chr1	101409922	101409982
A_16_P35245570	0.0197544	0.00157818	down	1.09166	-1.09166	-0.126524	SLC30A7	Homo sapiens solute carrier family 30 (zinc transporter), member 7 (SLC30A7), transcript variant 2, mRNA.	148867	chr1	101427469	101427529
A_14_P108059	0.016217	0.00112372	up	1.14356	1.14356	0.193534	SLC30A7	Homo sapiens solute carrier family 30 (zinc transporter), member 7 (SLC30A7), transcript variant 2, mRNA.	148867	chr1	101399603	101399663
A_16_P15233496	0.0328606	0.00371007	down	1.08395	-1.08395	-0.116302	SLC35A3	Homo sapiens solute carrier family 35 (UDP-N-acetylglucosamine (UDP-GlcNAc) transporter), member A3 (SLC35A3), mRNA.	23443	chr1	100480895	100480955
A_16_P35243253	0.0194917	0.00154081	down	1.1376	-1.1376	-0.18599	SLC35A3	Homo sapiens solute carrier family 35 (UDP-N-acetylglucosamine (UDP-GlcNAc) transporter), member A3 (SLC35A3), mRNA.	23443	chr1	100472585	100472645
A_14_P117198	0.0226946	0.00200052	down	1.06427	-1.06427	-0.0898663	SLC35D1	Homo sapiens solute carrier family 35 (UDP-glucuronic acid/UDP-N-acetylgalactosamine dual transporter), member D1 (SLC35D1), mRNA.	23169	chr1	67510406	67510466
A_14_P130955	0.024697	0.00230139	down	1.0885	-1.0885	-0.122344	SLC35D1	Homo sapiens solute carrier family 35 (UDP-glucuronic acid/UDP-N-acetylgalactosamine dual transporter), member D1 (SLC35D1), mRNA.	23169	chr1	67469476	67469536
A_14_P108748	0.0257585	0.00246688	down	1.13241	-1.13241	-0.179394	SLC35F3	Homo sapiens solute carrier family 35, member F3 (SLC35F3), mRNA.	148641	chr1	234273771	234273831
A_16_P15489325	0.0233508	0.00209655	up	1.16063	1.16063	0.214911	SLC35F3	Homo sapiens solute carrier family 35, member F3 (SLC35F3), mRNA.	148641	chr1	234158479	234158539
A_16_P00277365	0.0173928	0.00126993	up	1.16231	1.16231	0.216992	SLC35F3	Homo sapiens solute carrier family 35, member F3 (SLC35F3), mRNA.	148641	chr1	234306709	234306769
A_16_P15489186	0.0456356	0.00638302	up	1.15964	1.15964	0.213677	SLC35F3	Homo sapiens solute carrier family 35, member F3 (SLC35F3), mRNA.	148641	chr1	234098496	234098556
A_16_P00277410	0.0107525	0.000554632	up	1.18753	1.18753	0.247963	SLC35F3	Homo sapiens solute carrier family 35, member F3 (SLC35F3), mRNA.	148641	chr1	234340725	234340785
A_16_P35230553	0.0346805	0.0040542	down	1.10098	-1.10098	-0.138793	SLC44A3	Homo sapiens solute carrier family 44, member 3 (SLC44A3), transcript variant 1, mRNA.	126969	chr1	95303415	95303475
A_16_P15174727	0.0316176	0.00346964	down	1.13047	-1.13047	-0.176918	SLC44A5	Homo sapiens solute carrier family 44, member 5 (SLC44A5), transcript variant 2, mRNA.	204962	chr1	75858868	75858928
A_16_P35183558	0.00480856	0.000132061	down	1.10096	-1.10096	-0.138763	SLC44A5	Homo sapiens solute carrier family 44, member 5 (SLC44A5), transcript variant 2, mRNA.	204962	chr1	76060050	76060110
A_16_P15174880	0.0346805	0.0040542	down	1.06894	-1.06894	-0.0961748	SLC44A5	Homo sapiens solute carrier family 44, member 5 (SLC44A5), transcript variant 2, mRNA.	204962	chr1	75939640	75939700
A_16_P15174774	0.0401437	0.00515504	down	1.06507	-1.06507	-0.0909491	SLC44A5	Homo sapiens solute carrier family 44, member 5 (SLC44A5), transcript variant 2, mRNA.	204962	chr1	75879817	75879877
A_16_P15174697	0.000690712	3.06192e-06	down	1.11372	-1.11372	-0.15539	SLC44A5	Homo sapiens solute carrier family 44, member 5 (SLC44A5), transcript variant 2, mRNA.	204962	chr1	75820708	75820768
A_16_P00098051	0.00542561	0.000165367	up	1.28152	1.28152	0.357857	SLC44A5	Homo sapiens solute carrier family 44, member 5 (SLC44A5), transcript variant 2, mRNA.	204962	chr1	75693443	75693503
A_16_P15174470	0.00923183	0.000427277	down	1.10633	-1.10633	-0.145785	SLC44A5	Homo sapiens solute carrier family 44, member 5 (SLC44A5), transcript variant 2, mRNA.	204962	chr1	75722075	75722135
A_14_P113699	0.00643374	0.000224211	down	1.09816	-1.09816	-0.135095	SLC44A5	Homo sapiens solute carrier family 44, member 5 (SLC44A5), transcript variant 2, mRNA.	204962	chr1	76007101	76007161
A_14_P201120	0.0456356	0.00638302	down	1.11805	-1.11805	-0.160985	SLC45A1	Homo sapiens solute carrier family 45, member 1 (SLC45A1), mRNA.	50651	chr1	8395178	8395238
A_16_P00145862	0.0375783	0.00462491	down	1.10944	-1.10944	-0.149831	SLC6A17	Homo sapiens solute carrier family 6, member 17 (SLC6A17), mRNA.	388662	chr1	110729114	110729174
A_16_P15256046	0.0110621	0.000584017	down	1.10955	-1.10955	-0.149973	SLC6A17	Homo sapiens solute carrier family 6, member 17 (SLC6A17), mRNA.	388662	chr1	110699378	110699438
A_16_P00034178	0.0328606	0.00371007	up	1.14136	1.14136	0.19075	SLC9A1	Homo sapiens solute carrier family 9 (sodium/hydrogen exchanger), member 1 (SLC9A1), mRNA.	6548	chr1	27469645	27469705
A_16_P35360641	0.016217	0.00112372	up	1.18323	1.18323	0.242732	SLC9A11	Homo sapiens solute carrier family 9, member 11 (SLC9A11), mRNA.	284525	chr1	173555360	173555420
A_16_P00169909	0.00783203	0.000318992	up	1.17468	1.17468	0.232273	SMG5	Homo sapiens Smg-5 homolog, nonsense mediated mRNA decay factor (C. elegans) (SMG5), mRNA.	23381	chr1	156248727	156248787
A_14_P117036	0.000929422	5.59715e-06	up	1.2462	1.2462	0.317539	SMG5	Homo sapiens Smg-5 homolog, nonsense mediated mRNA decay factor (C. elegans) (SMG5), mRNA.	23381	chr1	156244802	156244862
A_14_P137949	0.0140134	0.000876849	up	1.15856	1.15856	0.212337	SMG7	Homo sapiens Smg-7 homolog, nonsense mediated mRNA decay factor (C. elegans) (SMG7), transcript variant 1, mRNA.	9887	chr1	183505806	183505866
A_16_P15442299	0.0119295	0.000663939	up	1.18989	1.18989	0.250824	SMYD2	Homo sapiens SET and MYND domain containing 2 (SMYD2), mRNA.	56950	chr1	214463795	214463855
A_14_P130594	0.0279629	0.00283095	up	1.1633	1.1633	0.218224	SMYD3	Homo sapiens SET and MYND domain containing 3 (SMYD3), transcript variant 2, mRNA.	64754	chr1	246201440	246201500
A_16_P00294304	0.00908792	0.000416169	down	1.12853	-1.12853	-0.174441	SMYD3	Homo sapiens SET and MYND domain containing 3 (SMYD3), transcript variant 2, mRNA.	64754	chr1	246301538	246301598
A_16_P15520035	0.0287592	0.00296281	up	1.15215	1.15215	0.20433	SMYD3	Homo sapiens SET and MYND domain containing 3 (SMYD3), transcript variant 1, mRNA.	64754	chr1	246640286	246640346
A_14_P101454	0.00458886	0.000121287	up	1.20851	1.20851	0.273228	SMYD3	Homo sapiens SET and MYND domain containing 3 (SMYD3), transcript variant 2, mRNA.	64754	chr1	246518302	246518362
A_16_P15518310	0.0197544	0.00157818	up	1.14417	1.14417	0.194303	SMYD3	Homo sapiens SET and MYND domain containing 3 (SMYD3), transcript variant 2, mRNA.	64754	chr1	245966390	245966450
A_16_P35540480	0.00542561	0.000165367	up	1.18087	1.18087	0.239855	SMYD3	Homo sapiens SET and MYND domain containing 3 (SMYD3), transcript variant 2, mRNA.	64754	chr1	246450710	246450770
A_16_P00268529	0.023028	0.00204802	up	1.21832	1.21832	0.284895	SNAP47	Homo sapiens synaptosomal-associated protein, 47kDa (SNAP47), mRNA.		chr1	227930514	227930571
A_14_P112459	0.0283729	0.00289619	up	1.10808	1.10808	0.148057	SNHG12	Homo sapiens small nucleolar RNA host gene 12 (non-protein coding) (SNHG12), non-coding RNA.		chr1	28905090	28905150
A_16_P15067655	0.0173928	0.00126993	up	1.14007	1.14007	0.189123	SNHG3-RCC1	Homo sapiens SNHG3-RCC1 readthrough transcript (SNHG3-RCC1), transcript variant 1, mRNA.	751867	chr1	28851361	28851421
A_16_P35307277	0.0206135	0.00169535	up	1.12535	1.12535	0.170378	SNX27	Homo sapiens sorting nexin family member 27 (SNX27), mRNA.	81609	chr1	151655897	151655957
A_14_P111429	0.000767744	3.75017e-06	up	1.28179	1.28179	0.35816	SNX27	Homo sapiens sorting nexin family member 27 (SNX27), mRNA.	81609	chr1	151633433	151633493
A_16_P00131409	0.0328606	0.00371007	down	1.09492	-1.09492	-0.130827	SNX7	Homo sapiens sorting nexin 7 (SNX7), transcript variant 1, mRNA.	51375	chr1	99203913	99203973
A_16_P15230395	0.00726985	0.000278796	down	1.08733	-1.08733	-0.120786	SNX7	Homo sapiens sorting nexin 7 (SNX7), transcript variant 1, mRNA.	51375	chr1	99150414	99150474
A_16_P15230451	0.0450598	0.00624935	down	1.08055	-1.08055	-0.111769	SNX7	Homo sapiens sorting nexin 7 (SNX7), transcript variant 1, mRNA.	51375	chr1	99169137	99169197
A_16_P15230386	0.0132204	0.000793006	up	1.11185	1.11185	0.15296	SNX7	Homo sapiens sorting nexin 7 (SNX7), transcript variant 1, mRNA.	51375	chr1	99142572	99142632
A_16_P15274109	0.0468282	0.00665813	up	1.11313	1.11313	0.154624	SPAG17	Homo sapiens sperm associated antigen 17 (SPAG17), mRNA.	200162	chr1	118548437	118548497
A_16_P35285828	0.0253887	0.00241054	down	1.09405	-1.09405	-0.129679	SPAG17	Homo sapiens sperm associated antigen 17 (SPAG17), mRNA.	200162	chr1	118693151	118693211
A_16_P15274405	0.00869282	0.000384443	down	1.0941	-1.0941	-0.129739	SPAG17	Homo sapiens sperm associated antigen 17 (SPAG17), mRNA.	200162	chr1	118672561	118672621
A_16_P35285749	0.00450789	0.000117884	down	1.14798	-1.14798	-0.199098	SPAG17	Homo sapiens sperm associated antigen 17 (SPAG17), mRNA.	200162	chr1	118665841	118665901
A_16_P15197064	0.0119295	0.000663939	down	1.10824	-1.10824	-0.148274	SPATA1	Homo sapiens spermatogenesis associated 1 (SPATA1), mRNA.	64173	chr1	85020491	85020551
A_14_P113847	0.0240504	0.00219678	up	1.2405	1.2405	0.310926	SPATA1	Homo sapiens spermatogenesis associated 1 (SPATA1), mRNA.	64173	chr1	84972676	84972736
A_16_P35205675	0.0396677	0.00504481	down	1.08821	-1.08821	-0.121956	SPATA1	Homo sapiens spermatogenesis associated 1 (SPATA1), mRNA.	64173	chr1	84981879	84981939
A_16_P35470589	0.0324585	0.00362829	down	1.11389	-1.11389	-0.155613	SPATA17	Homo sapiens spermatogenesis associated 17 (SPATA17), mRNA.	128153	chr1	218040381	218040441
A_16_P15451631	0.0171518	0.00123935	down	1.1325	-1.1325	-0.17951	SPATA17	Homo sapiens spermatogenesis associated 17 (SPATA17), mRNA.	128153	chr1	218026061	218026121
A_14_P135206	0.00819132	0.00034565	up	1.23527	1.23527	0.304828	SPATA17	Homo sapiens spermatogenesis associated 17 (SPATA17), mRNA.	128153	chr1	217975097	217975157
A_14_P132509	0.00936608	0.00043866	up	1.23617	1.23617	0.305882	SPATA17	Homo sapiens spermatogenesis associated 17 (SPATA17), mRNA.	128153	chr1	218006520	218006580
A_16_P15111708	0.0184213	0.00139934	down	1.06587	-1.06587	-0.092033	SPATA6	Homo sapiens spermatogenesis associated 6 (SPATA6), mRNA.	54558	chr1	48795163	48795223
A_16_P35118566	0.0217786	0.00186404	up	1.12876	1.12876	0.174737	SPATA6	Homo sapiens spermatogenesis associated 6 (SPATA6), mRNA.	54558	chr1	48804898	48804958
A_16_P00060997	0.00783203	0.000318992	up	1.12373	1.12373	0.168297	SPATA6	Homo sapiens spermatogenesis associated 6 (SPATA6), mRNA.	54558	chr1	48911429	48911489
A_14_P113425	0.00170588	1.8441e-05	up	1.33758	1.33758	0.419624	SPTA1	Homo sapiens spectrin, alpha, erythrocytic 1 (elliptocytosis 2) (SPTA1), mRNA.	6708	chr1	158607904	158607964
A_16_P35324685	0.00201138	2.51763e-05	up	1.27012	1.27012	0.344963	SPTA1	Homo sapiens spectrin, alpha, erythrocytic 1 (elliptocytosis 2) (SPTA1), mRNA.	6708	chr1	158627193	158627253
A_16_P15310401	0.00243094	3.74732e-05	up	1.1866	1.1866	0.246835	SPTA1	Homo sapiens spectrin, alpha, erythrocytic 1 (elliptocytosis 2) (SPTA1), mRNA.	6708	chr1	158587367	158587427
A_16_P15059518	0.0450598	0.00624935	up	1.08508	1.08508	0.117807	SRRM1	Homo sapiens serine/arginine repetitive matrix 1 (SRRM1), mRNA.	10250	chr1	24981599	24981659
A_16_P00068314	0.0107525	0.000554632	up	1.12124	1.12124	0.165097	SSBP3	Homo sapiens single stranded DNA binding protein 3 (SSBP3), transcript variant 2, mRNA.	23648	chr1	54757319	54757379
A_16_P15124308	0.00908792	0.000416169	down	1.11469	-1.11469	-0.156646	SSBP3	Homo sapiens single stranded DNA binding protein 3 (SSBP3), transcript variant 2, mRNA.	23648	chr1	54708106	54708166
A_14_P122093	0.0316176	0.00346964	up	1.10393	1.10393	0.142645	SSBP3	Homo sapiens single stranded DNA binding protein 3 (SSBP3), transcript variant 2, mRNA.	23648	chr1	54794685	54794745
A_16_P00169541	0.00159358	1.62613e-05	up	1.27079	1.27079	0.345727	SSR2	Homo sapiens signal sequence receptor, beta (translocon-associated protein beta) (SSR2), mRNA.	6746	chr1	155983733	155983793
A_16_P00055514	0.016217	0.00112372	down	1.07177	-1.07177	-0.0999977	ST3GAL3	Homo sapiens ST3 beta-galactoside alpha-2,3-sialyltransferase 3 (ST3GAL3), transcript variant 10, mRNA.	6487	chr1	44379647	44379704
A_16_P00099276	0.0236999	0.00214613	up	1.14799	1.14799	0.199106	ST6GALNAC3	Homo sapiens ST6 (alpha-N-acetyl-neuraminyl-2,3-beta-galactosyl-1, 3)-N-acetylgalactosaminide alpha-2,6-sialyltransferase 3 (ST6GALNAC3), transcript variant 2, mRNA.	256435	chr1	76675906	76675966
A_16_P15176586	0.0361183	0.00433104	down	1.0796	-1.0796	-0.110496	ST6GALNAC3	Homo sapiens ST6 (alpha-N-acetyl-neuraminyl-2,3-beta-galactosyl-1, 3)-N-acetylgalactosaminide alpha-2,6-sialyltransferase 3 (ST6GALNAC3), transcript variant 2, mRNA.	256435	chr1	76730523	76730583
A_16_P15177256	0.000950766	5.78533e-06	down	1.12167	-1.12167	-0.165653	ST6GALNAC3	Homo sapiens ST6 (alpha-N-acetyl-neuraminyl-2,3-beta-galactosyl-1, 3)-N-acetylgalactosaminide alpha-2,6-sialyltransferase 3 (ST6GALNAC3), transcript variant 2, mRNA.	256435	chr1	76977457	76977517
A_16_P15176826	0.00517748	0.000152044	down	1.09245	-1.09245	-0.127566	ST6GALNAC3	Homo sapiens ST6 (alpha-N-acetyl-neuraminyl-2,3-beta-galactosyl-1, 3)-N-acetylgalactosaminide alpha-2,6-sialyltransferase 3 (ST6GALNAC3), transcript variant 2, mRNA.	256435	chr1	76813809	76813869
A_16_P15177112	0.000703258	3.16754e-06	down	1.1372	-1.1372	-0.18548	ST6GALNAC3	Homo sapiens ST6 (alpha-N-acetyl-neuraminyl-2,3-beta-galactosyl-1, 3)-N-acetylgalactosaminide alpha-2,6-sialyltransferase 3 (ST6GALNAC3), transcript variant 2, mRNA.	256435	chr1	76926876	76926936
A_16_P35184823	0.00292669	5.37196e-05	up	1.19632	1.19632	0.258603	ST6GALNAC3	Homo sapiens ST6 (alpha-N-acetyl-neuraminyl-2,3-beta-galactosyl-1, 3)-N-acetylgalactosaminide alpha-2,6-sialyltransferase 3 (ST6GALNAC3), transcript variant 2, mRNA.	256435	chr1	76647882	76647942
A_16_P35184921	0.00473557	0.000128369	down	1.10087	-1.10087	-0.138649	ST6GALNAC3	Homo sapiens ST6 (alpha-N-acetyl-neuraminyl-2,3-beta-galactosyl-1, 3)-N-acetylgalactosaminide alpha-2,6-sialyltransferase 3 (ST6GALNAC3), transcript variant 2, mRNA.	256435	chr1	76682570	76682630
A_16_P15177106	0.0474384	0.00679964	down	1.05644	-1.05644	-0.0792146	ST6GALNAC3	Homo sapiens ST6 (alpha-N-acetyl-neuraminyl-2,3-beta-galactosyl-1, 3)-N-acetylgalactosaminide alpha-2,6-sialyltransferase 3 (ST6GALNAC3), transcript variant 2, mRNA.	256435	chr1	76921350	76921403
A_16_P15177475	0.00222307	3.12194e-05	down	1.12448	-1.12448	-0.169261	ST6GALNAC3	Homo sapiens ST6 (alpha-N-acetyl-neuraminyl-2,3-beta-galactosyl-1, 3)-N-acetylgalactosaminide alpha-2,6-sialyltransferase 3 (ST6GALNAC3), transcript variant 1, mRNA.	256435	chr1	77062404	77062464
A_16_P15177047	0.0181468	0.00136589	down	1.07958	-1.07958	-0.110477	ST6GALNAC3	Homo sapiens ST6 (alpha-N-acetyl-neuraminyl-2,3-beta-galactosyl-1, 3)-N-acetylgalactosaminide alpha-2,6-sialyltransferase 3 (ST6GALNAC3), transcript variant 2, mRNA.	256435	chr1	76893875	76893935
A_16_P15177018	0.0206135	0.00169535	down	1.08285	-1.08285	-0.114837	ST6GALNAC3	Homo sapiens ST6 (alpha-N-acetyl-neuraminyl-2,3-beta-galactosyl-1, 3)-N-acetylgalactosaminide alpha-2,6-sialyltransferase 3 (ST6GALNAC3), transcript variant 2, mRNA.	256435	chr1	76884986	76885046
A_16_P15176338	0.0148657	0.000968848	up	1.15871	1.15871	0.21252	ST6GALNAC3	Homo sapiens ST6 (alpha-N-acetyl-neuraminyl-2,3-beta-galactosyl-1, 3)-N-acetylgalactosaminide alpha-2,6-sialyltransferase 3 (ST6GALNAC3), transcript variant 2, mRNA.	256435	chr1	76636448	76636508
A_16_P00099945	0.0433107	0.0058633	down	1.05656	-1.05656	-0.0793811	ST6GALNAC3	Homo sapiens ST6 (alpha-N-acetyl-neuraminyl-2,3-beta-galactosyl-1, 3)-N-acetylgalactosaminide alpha-2,6-sialyltransferase 3 (ST6GALNAC3), transcript variant 1, mRNA.	256435	chr1	77077242	77077302
A_16_P00099235	0.0110621	0.000584017	up	1.13364	1.13364	0.180963	ST6GALNAC3	Homo sapiens ST6 (alpha-N-acetyl-neuraminyl-2,3-beta-galactosyl-1, 3)-N-acetylgalactosaminide alpha-2,6-sialyltransferase 3 (ST6GALNAC3), transcript variant 2, mRNA.	256435	chr1	76654156	76654216
A_14_P122321	0.00275843	4.7678e-05	down	1.12781	-1.12781	-0.173519	ST6GALNAC3	Homo sapiens ST6 (alpha-N-acetyl-neuraminyl-2,3-beta-galactosyl-1, 3)-N-acetylgalactosaminide alpha-2,6-sialyltransferase 3 (ST6GALNAC3), transcript variant 1, mRNA.	256435	chr1	77094959	77095019
A_16_P15176302	0.00104013	6.82066e-06	down	1.13736	-1.13736	-0.18569	ST6GALNAC3	Homo sapiens ST6 (alpha-N-acetyl-neuraminyl-2,3-beta-galactosyl-1, 3)-N-acetylgalactosaminide alpha-2,6-sialyltransferase 3 (ST6GALNAC3), transcript variant 2, mRNA.	256435	chr1	76618357	76618417
A_16_P15178543	0.0450598	0.00624935	up	1.13923	1.13923	0.188065	ST6GALNAC5	Homo sapiens ST6 (alpha-N-acetyl-neuraminyl-2,3-beta-galactosyl-1, 3)-N-acetylgalactosaminide alpha-2,6-sialyltransferase 5 (ST6GALNAC5), mRNA.	81849	chr1	77521872	77521932
A_16_P15178319	0.0128595	0.000753935	down	1.11997	-1.11997	-0.163464	ST6GALNAC5	Homo sapiens ST6 (alpha-N-acetyl-neuraminyl-2,3-beta-galactosyl-1, 3)-N-acetylgalactosaminide alpha-2,6-sialyltransferase 5 (ST6GALNAC5), mRNA.	81849	chr1	77416682	77416742
A_16_P15178331	0.00717344	0.000271349	up	1.1063	1.1063	0.145745	ST6GALNAC5	Homo sapiens ST6 (alpha-N-acetyl-neuraminyl-2,3-beta-galactosyl-1, 3)-N-acetylgalactosaminide alpha-2,6-sialyltransferase 5 (ST6GALNAC5), mRNA.	81849	chr1	77422453	77422513
A_16_P35186829	0.0499507	0.00739309	up	1.10479	1.10479	0.143773	ST6GALNAC5	Homo sapiens ST6 (alpha-N-acetyl-neuraminyl-2,3-beta-galactosyl-1, 3)-N-acetylgalactosaminide alpha-2,6-sialyltransferase 5 (ST6GALNAC5), mRNA.	81849	chr1	77428141	77428201
A_16_P00100382	0.0250427	0.00235539	down	1.08549	-1.08549	-0.118347	ST6GALNAC5	Homo sapiens ST6 (alpha-N-acetyl-neuraminyl-2,3-beta-galactosyl-1, 3)-N-acetylgalactosaminide alpha-2,6-sialyltransferase 5 (ST6GALNAC5), mRNA.	81849	chr1	77389449	77389509
A_16_P15178213	0.00693312	0.00025701	down	1.10482	-1.10482	-0.143814	ST6GALNAC5	Homo sapiens ST6 (alpha-N-acetyl-neuraminyl-2,3-beta-galactosyl-1, 3)-N-acetylgalactosaminide alpha-2,6-sialyltransferase 5 (ST6GALNAC5), mRNA.	81849	chr1	77383037	77383097
A_16_P00149318	0.0142069	0.000899058	up	1.10166	1.10166	0.139684	ST7L	Homo sapiens suppression of tumorigenicity 7 like (ST7L), transcript variant 1, mRNA.	54879	chr1	113143433	113143493
A_16_P15261807	0.0401437	0.00515504	down	1.10552	-1.10552	-0.144722	ST7L	Homo sapiens suppression of tumorigenicity 7 like (ST7L), transcript variant 1, mRNA.	54879	chr1	113134924	113134984
A_16_P35272496	0.0217786	0.00186404	down	1.11142	-1.11142	-0.152403	ST7L	Homo sapiens suppression of tumorigenicity 7 like (ST7L), transcript variant 1, mRNA.	54879	chr1	113083390	113083450
A_14_P131264	0.0486394	0.00709079	down	1.06906	-1.06906	-0.0963446	ST7L	Homo sapiens suppression of tumorigenicity 7 like (ST7L), transcript variant 1, mRNA.	54879	chr1	113120994	113121054
A_16_P15261797	0.00908792	0.000416169	up	1.0675	1.0675	0.0942401	ST7L	Homo sapiens suppression of tumorigenicity 7 like (ST7L), transcript variant 1, mRNA.	54879	chr1	113128672	113128732
A_14_P106542	0.00123842	9.7575e-06	up	1.28155	1.28155	0.357895	STK40	Homo sapiens serine/threonine kinase 40 (STK40), mRNA.	83931	chr1	36848276	36848336
A_16_P00034984	0.0316176	0.00346964	up	1.17047	1.17047	0.227093	STX12	Homo sapiens syntaxin 12 (STX12), mRNA.	23673	chr1	28150303	28150363
A_16_P00034966	0.00480856	0.000132061	up	1.22317	1.22317	0.290624	STX12	Homo sapiens syntaxin 12 (STX12), mRNA.	23673	chr1	28136785	28136845
A_16_P15266845	0.0124937	0.000716657	down	1.07637	-1.07637	-0.106171	SYCP1	Homo sapiens synaptonemal complex protein 1 (SYCP1), mRNA.	6847	chr1	115498553	115498611
A_16_P15432245	0.0456356	0.00638302	up	1.19281	1.19281	0.254363	SYT14	Homo sapiens synaptotagmin XIV (SYT14), transcript variant 1, mRNA.	255928	chr1	210141759	210141819
A_16_P35450660	0.0412187	0.00538204	down	1.11111	-1.11111	-0.152002	SYT14	Homo sapiens synaptotagmin XIV (SYT14), transcript variant 1, mRNA.	255928	chr1	210162694	210162754
A_16_P15432211	0.0333342	0.00379352	up	1.14018	1.14018	0.189256	SYT14	Homo sapiens synaptotagmin XIV (SYT14), transcript variant 1, mRNA.	255928	chr1	210123725	210123785
A_16_P15432225	0.00964564	0.000462282	up	1.22617	1.22617	0.294156	SYT14	Homo sapiens synaptotagmin XIV (SYT14), transcript variant 1, mRNA.	255928	chr1	210129991	210130051
A_14_P127003	0.0142069	0.000899058	up	1.11089	1.11089	0.151717	SYT2	Homo sapiens synaptotagmin II (SYT2), transcript variant 1, mRNA.	127833	chr1	202642916	202642976
A_16_P00234442	0.0264735	0.00258318	up	1.09887	1.09887	0.136024	SYT2	Homo sapiens synaptotagmin II (SYT2), transcript variant 1, mRNA.	127833	chr1	202632116	202632175
A_16_P15329628	0.0351611	0.00414464	up	1.143	1.143	0.192821	TADA1	Homo sapiens transcriptional adaptor 1 (TADA1), mRNA.		chr1	166834053	166834113
A_16_P00144244	0.0433107	0.0058633	down	1.08427	-1.08427	-0.116721	TAF13	Homo sapiens TAF13 RNA polymerase II, TATA box binding protein (TBP)-associated factor, 18kDa (TAF13), mRNA.	6884	chr1	109615812	109615872
A_14_P107362	0.00502757	0.000143731	up	1.21012	1.21012	0.275146	TAF5L	Homo sapiens TAF5-like RNA polymerase II, p300/CBP-associated factor (PCAF)-associated factor, 65kDa (TAF5L), transcript variant 1, mRNA.	27097	chr1	229736834	229736894
A_16_P00277683	0.0474384	0.00679964	down	1.46469	-1.46469	-0.550593	TARBP1	Homo sapiens TAR (HIV-1) RNA binding protein 1 (TARBP1), mRNA.	6894	chr1	234528170	234528228
A_16_P35510558	0.00663109	0.000236828	up	1.29859	1.29859	0.376942	TARBP1	Homo sapiens TAR (HIV-1) RNA binding protein 1 (TARBP1), mRNA.	6894	chr1	234608422	234608482
A_16_P15016273	0.0107525	0.000554632	up	1.15486	1.15486	0.207722	TAS1R1	Homo sapiens taste receptor, type 1, member 1 (TAS1R1), transcript variant 2, mRNA.	80835	chr1	6637959	6638018
A_16_P00157501	0.0214998	0.00182048	down	1.13847	-1.13847	-0.187091	TBX15	Homo sapiens T-box 15 (TBX15), mRNA.	6913	chr1	119520902	119520962
A_16_P15276138	0.0320304	0.00354816	down	1.12612	-1.12612	-0.171359	TBX15	Homo sapiens T-box 15 (TBX15), mRNA.	6913	chr1	119511364	119511423
A_16_P00157392	0.0211963	0.00177786	down	1.09231	-1.09231	-0.127382	TBX15	Homo sapiens T-box 15 (TBX15), mRNA.	6913	chr1	119469103	119469162
A_16_P00157323	0.0214998	0.00182048	down	1.0776	-1.0776	-0.107816	TBX15	Homo sapiens T-box 15 (TBX15), mRNA.	6913	chr1	119437776	119437836
A_16_P00029838	0.0144184	0.000921786	up	1.11545	1.11545	0.157625	TCEA3	Homo sapiens transcription elongation factor A (SII), 3 (TCEA3), mRNA.	6920	chr1	23748606	23748666
A_16_P15057478	0.0220936	0.00190855	up	1.14633	1.14633	0.197024	TCEB3	Homo sapiens transcription elongation factor B (SIII), polypeptide 3 (110kDa, elongin A) (TCEB3), mRNA.	6924	chr1	24074288	24074348
A_16_P35314116	0.00672488	0.000243384	up	1.16135	1.16135	0.215797	TDRD10	Homo sapiens tudor domain containing 10 (TDRD10), transcript variant 1, mRNA.	126668	chr1	154486326	154486386
A_16_P00167719	0.00517748	0.000152044	up	1.13873	1.13873	0.187426	TDRD10	Homo sapiens tudor domain containing 10 (TDRD10), transcript variant 1, mRNA.	126668	chr1	154507514	154507574
A_16_P15358924	0.0474384	0.00679964	up	1.0889	1.0889	0.122869	TDRD5	Homo sapiens tudor domain containing 5 (TDRD5), mRNA.	163589	chr1	179580946	179581006
A_14_P124300	0.000849951	4.58538e-06	up	1.40848	1.40848	0.494144	TEDDM1	Homo sapiens transmembrane epididymal protein 1 (TEDDM1), mRNA.	127670	chr1	182367464	182367524
A_16_P35111956	0.00517748	0.000152044	up	1.18333	1.18333	0.242847	TESK2	Homo sapiens testis-specific kinase 2 (TESK2), mRNA.	10420	chr1	45868542	45868602
A_14_P118900	0.012114	0.000681097	up	1.13393	1.13393	0.181332	TESK2	Homo sapiens testis-specific kinase 2 (TESK2), mRNA.	10420	chr1	45887435	45887487
A_14_P114581	0.0462323	0.00651927	up	1.12329	1.12329	0.167736	TGFB2	Homo sapiens transforming growth factor, beta 2 (TGFB2), transcript variant 1, mRNA.	7042	chr1	218587377	218587437
A_16_P00121683	0.00231935	3.42108e-05	down	1.19712	-1.19712	-0.259566	TGFBR3	Homo sapiens transforming growth factor, beta receptor III (TGFBR3), mRNA.	7049	chr1	92333191	92333251
A_16_P00121364	0.0320304	0.00354816	down	1.08838	-1.08838	-0.122182	TGFBR3	Homo sapiens transforming growth factor, beta receptor III (TGFBR3), mRNA.	7049	chr1	92163654	92163714
A_14_P137532	0.00726985	0.000278796	down	1.09384	-1.09384	-0.129401	TGFBR3	Homo sapiens transforming growth factor, beta receptor III (TGFBR3), mRNA.	7049	chr1	92193190	92193250
A_16_P15214042	0.0342432	0.00396555	up	1.0927	1.0927	0.127899	TGFBR3	Homo sapiens transforming growth factor, beta receptor III (TGFBR3), mRNA.	7049	chr1	92249628	92249688
A_14_P106704	0.00275843	4.7678e-05	down	1.126	-1.126	-0.17121	TGFBR3	Homo sapiens transforming growth factor, beta receptor III (TGFBR3), mRNA.	7049	chr1	92185839	92185893
A_16_P15213910	0.0275847	0.00276705	up	1.0931	1.0931	0.128425	TGFBR3	Homo sapiens transforming growth factor, beta receptor III (TGFBR3), mRNA.	7049	chr1	92204896	92204956
A_16_P15213994	0.0194917	0.00154081	up	1.08964	1.08964	0.123856	TGFBR3	Homo sapiens transforming growth factor, beta receptor III (TGFBR3), mRNA.	7049	chr1	92233905	92233965
A_16_P00007829	0.0312139	0.0033927	up	1.08232	1.08232	0.114121	THAP3	Homo sapiens THAP domain containing, apoptosis associated protein 3 (THAP3), mRNA.	90326	chr1	6689803	6689862
A_14_P104168	0.0428059	0.00573948	up	1.22207	1.22207	0.289322	THRAP3	Homo sapiens thyroid hormone receptor associated protein 3 (THRAP3), mRNA.	9967	chr1	36705547	36705607
A_16_P15084639	0.0444695	0.0061182	up	1.11917	1.11917	0.162435	THRAP3	Homo sapiens thyroid hormone receptor associated protein 3 (THRAP3), mRNA.	9967	chr1	36716864	36716924
A_16_P15100771	0.0450598	0.00624935	up	1.09281	1.09281	0.12804	TIE1	Homo sapiens tyrosine kinase with immunoglobulin-like and EGF-like domains 1 (TIE1), mRNA.	7075	chr1	43769012	43769072
A_16_P00024892	0.0396677	0.00504481	up	1.17038	1.17038	0.226974	TMCO4	Homo sapiens transmembrane and coiled-coil domains 4 (TMCO4), mRNA.	255104	chr1	20057359	20057419
A_16_P00024885	0.0417366	0.00549888	up	1.10726	1.10726	0.146988	TMCO4	Homo sapiens transmembrane and coiled-coil domains 4 (TMCO4), mRNA.	255104	chr1	20050575	20050635
A_16_P00024935	0.00126228	1.00775e-05	up	1.21611	1.21611	0.282274	TMCO4	Homo sapiens transmembrane and coiled-coil domains 4 (TMCO4), mRNA.	255104	chr1	20081195	20081255
A_14_P118397	0.0391604	0.00493672	down	1.08634	-1.08634	-0.119478	TMED5	Homo sapiens transmembrane emp24 protein transport domain containing 5 (TMED5), transcript variant 2, mRNA.	50999	chr1	93617700	93617760
A_16_P00012014	0.0223882	0.00195404	down	1.08818	-1.08818	-0.121917	TMEM201	Homo sapiens transmembrane protein 201 (TMEM201), transcript variant 2, mRNA.	199953	chr1	9660247	9660307
A_16_P35130602	0.0171518	0.00123935	down	1.10774	-1.10774	-0.147622	TMEM48	Homo sapiens transmembrane protein 48 (TMEM48), transcript variant 2, mRNA.	55706	chr1	54291422	54291482
A_14_P132210	0.0153171	0.00101813	up	1.098	1.098	0.134877	TMEM48	Homo sapiens transmembrane protein 48 (TMEM48), transcript variant 2, mRNA.	55706	chr1	54231917	54231977
A_16_P00018953	0.00895595	0.000405332	down	1.10872	-1.10872	-0.148893	TMEM51	Homo sapiens transmembrane protein 51 (TMEM51), transcript variant 1, mRNA.	55092	chr1	15484298	15484358
A_14_P123178	0.00949395	0.000450327	down	1.07606	-1.07606	-0.105759	TMEM56	Homo sapiens transmembrane protein 56 (TMEM56), mRNA.	148534	chr1	95615735	95615795
A_14_P130562	0.0169113	0.00120946	down	1.46253	-1.46253	-0.548464	TMEM56	Homo sapiens transmembrane protein 56 (TMEM56), mRNA.	148534	chr1	95648682	95648742
A_16_P00126116	0.0316176	0.00346964	down	1.09784	-1.09784	-0.134667	TMEM56	Homo sapiens transmembrane protein 56 (TMEM56), mRNA.	148534	chr1	95596456	95596516
A_14_P123201	0.00182914	2.08987e-05	up	1.29162	1.29162	0.369181	TMEM59	Homo sapiens transmembrane protein 59 (TMEM59), mRNA.	9528	chr1	54512913	54512973
A_14_P137815	0.0438892	0.00598953	up	1.10132	1.10132	0.139238	TMOD4	Homo sapiens tropomodulin 4 (muscle) (TMOD4), mRNA.	29765	chr1	151145843	151145894
A_16_P00015594	0.0283729	0.00289619	down	1.10569	-1.10569	-0.144953	TNFRSF1B	Homo sapiens tumor necrosis factor receptor superfamily, member 1B (TNFRSF1B), mRNA.	7133	chr1	12268073	12268133
A_14_P202512	0.0291367	0.00303081	up	1.19374	1.19374	0.25549	TNFSF18	Homo sapiens tumor necrosis factor (ligand) superfamily, member 18 (TNFSF18), mRNA.	8995	chr1	173010709	173010769
A_14_P138781	0.0361183	0.00433104	up	1.14652	1.14652	0.197267	TNFSF4	Homo sapiens tumor necrosis factor (ligand) superfamily, member 4 (TNFSF4), mRNA.	7292	chr1	173174424	173174476
A_16_P15348215	0.0148657	0.000968848	up	1.13962	1.13962	0.188553	TNN	Homo sapiens tenascin N (TNN), mRNA.	63923	chr1	175085914	175085974
A_16_P15171988	0.0386297	0.00483074	down	1.07445	-1.07445	-0.103597	TNNI3K	Homo sapiens TNNI3 interacting kinase (TNNI3K), transcript variant 1, mRNA.	51086	chr1	74679769	74679829
A_14_P123745	0.00218735	3.02787e-05	down	1.13279	-1.13279	-0.179879	TNNI3K	Homo sapiens TNNI3 interacting kinase (TNNI3K), transcript variant 1, mRNA.	51086	chr1	74763933	74763993
A_16_P00097045	0.0486394	0.00709079	down	1.0533	-1.0533	-0.0749213	TNNI3K	Homo sapiens TNNI3 interacting kinase (TNNI3K), transcript variant 1, mRNA.	51086	chr1	74976274	74976334
A_16_P35180523	0.000610356	2.33048e-06	down	1.16737	-1.16737	-0.223266	TNNI3K	Homo sapiens TNNI3 interacting kinase (TNNI3K), transcript variant 1, mRNA.	51086	chr1	74794499	74794559
A_16_P00097056	0.016217	0.00112372	down	1.0841	-1.0841	-0.116493	TNNI3K	Homo sapiens TNNI3 interacting kinase (TNNI3K), transcript variant 1, mRNA.	51086	chr1	74982948	74983008
A_16_P00096930	0.00115214	8.57182e-06	down	1.12661	-1.12661	-0.171993	TNNI3K	Homo sapiens TNNI3 interacting kinase (TNNI3K), transcript variant 1, mRNA.	51086	chr1	74902131	74902191
A_16_P15172607	0.0130419	0.000773242	down	1.08315	-1.08315	-0.115235	TNNI3K	Homo sapiens TNNI3 interacting kinase (TNNI3K), transcript variant 1, mRNA.	51086	chr1	74935337	74935397
A_16_P15172104	0.0164415	0.00115165	down	1.07464	-1.07464	-0.103853	TNNI3K	Homo sapiens TNNI3 interacting kinase (TNNI3K), transcript variant 1, mRNA.	51086	chr1	74726454	74726514
A_16_P00097022	0.0110621	0.000584017	down	1.09059	-1.09059	-0.125103	TNNI3K	Homo sapiens TNNI3 interacting kinase (TNNI3K), transcript variant 1, mRNA.	51086	chr1	74963932	74963992
A_14_P134510	0.0474384	0.00679964	up	1.12009	1.12009	0.163621	TNR	Homo sapiens tenascin R (restrictin, janusin) (TNR), mRNA.	7143	chr1	175310372	175310432
A_16_P00196069	0.0401437	0.00515504	up	1.08222	1.08222	0.113995	TNR	Homo sapiens tenascin R (restrictin, janusin) (TNR), mRNA.	7143	chr1	175448846	175448905
A_16_P00195924	0.0346805	0.0040542	up	1.12381	1.12381	0.168395	TNR	Homo sapiens tenascin R (restrictin, janusin) (TNR), mRNA.	7143	chr1	175372054	175372114
A_16_P00196121	0.00993265	0.000487087	up	1.18878	1.18878	0.249481	TNR	Homo sapiens tenascin R (restrictin, janusin) (TNR), mRNA.	7143	chr1	175478881	175478941
A_16_P00196207	0.0140134	0.000876849	up	1.13286	1.13286	0.179964	TNR	Homo sapiens tenascin R (restrictin, janusin) (TNR), mRNA.	7143	chr1	175524444	175524504
A_16_P00196250	0.0112314	0.000599247	down	1.12219	-1.12219	-0.166312	TNR	Homo sapiens tenascin R (restrictin, janusin) (TNR), mRNA.	7143	chr1	175546929	175546989
A_16_P00196284	0.0192154	0.00150426	up	1.1626	1.1626	0.217358	TNR	Homo sapiens tenascin R (restrictin, janusin) (TNR), mRNA.	7143	chr1	175564755	175564815
A_16_P35375529	0.00672488	0.000243384	up	1.17788	1.17788	0.23619	TOR1AIP2	Homo sapiens torsin A interacting protein 2 (TOR1AIP2), transcript variant 2, mRNA.	163590	chr1	179830243	179830303
A_14_P102230	0.0422732	0.00561802	down	1.08731	-1.08731	-0.120758	TOR3A	Homo sapiens torsin family 3, member A (TOR3A), mRNA.	64222	chr1	179057718	179057777
A_14_P123511	0.00615105	0.000206462	down	1.08305	-1.08305	-0.1151	TP73	Homo sapiens tumor protein p73 (TP73), transcript variant 1, mRNA.	7161	chr1	3607226	3607275
A_14_P135435	0.0148657	0.000968848	up	1.11523	1.11523	0.157346	TPM3	Homo sapiens tropomyosin 3 (TPM3), transcript variant 4, mRNA.	7170	chr1	154154007	154154067
A_14_P200652	0.0194917	0.00154081	down	1.07519	-1.07519	-0.104587	TPRG1L	Homo sapiens tumor protein p63 regulated 1-like (TPRG1L), mRNA.	127262	chr1	3545293	3545353
A_14_P110893	0.0462323	0.00651927	down	1.10165	-1.10165	-0.139661	TRAF3IP3	Homo sapiens TRAF3 interacting protein 3 (TRAF3IP3), mRNA.	80342	chr1	209946478	209946538
A_14_P138749	0.00525734	0.000156369	down	1.11216	-1.11216	-0.153367	TRIM33	Homo sapiens tripartite motif-containing 33 (TRIM33), transcript variant a, mRNA.	51592	chr1	114970466	114970526
A_14_P112927	0.0110621	0.000584017	down	1.09305	-1.09305	-0.12836	TROVE2	Homo sapiens TROVE domain family, member 2 (TROVE2), transcript variant 3, mRNA.	6738	chr1	193034511	193034571
A_16_P15369757	0.0486394	0.00709069	down	1.09944	-1.09944	-0.136767	TSEN15	Homo sapiens tRNA splicing endonuclease 15 homolog (S. cerevisiae) (TSEN15), transcript variant 2, mRNA.		chr1	184031561	184031621
A_14_P107275	0.0433107	0.0058633	down	1.09562	-1.09562	-0.131743	TSEN15	Homo sapiens tRNA splicing endonuclease 15 homolog (S. cerevisiae) (TSEN15), transcript variant 2, mRNA.		chr1	184038076	184038136
A_14_P120406	0.0433107	0.0058633	down	1.13454	-1.13454	-0.182105	TSEN15	Homo sapiens tRNA splicing endonuclease 15 homolog (S. cerevisiae) (TSEN15), transcript variant 2, mRNA.		chr1	184021451	184021511
A_16_P15483906	0.0283729	0.00289619	down	1.11681	-1.11681	-0.159379	TSNAX-DISC1	Homo sapiens TSNAX-DISC1 gene (TSNAX-DISC1), transcript variant 1, non-coding RNA.		chr1	231985379	231985439
A_16_P15483733	0.0456356	0.00638302	up	1.15903	1.15903	0.212912	TSNAX-DISC1	Homo sapiens TSNAX-DISC1 gene (TSNAX-DISC1), transcript variant 2, non-coding RNA.		chr1	231917328	231917388
A_16_P00274041	0.0417366	0.00549888	up	1.10163	1.10163	0.139645	TSNAX-DISC1	Homo sapiens TSNAX-DISC1 gene (TSNAX-DISC1), transcript variant 1, non-coding RNA.		chr1	232042112	232042172
A_16_P00273652	0.0406627	0.00526743	up	1.24327	1.24327	0.31414	TSNAX-DISC1	Homo sapiens TSNAX-DISC1 gene (TSNAX-DISC1), transcript variant 7, non-coding RNA.		chr1	231803456	231803516
A_16_P15267024	0.00404177	9.64654e-05	down	1.12812	-1.12812	-0.173915	TSPAN2	Homo sapiens tetraspanin 2 (TSPAN2), mRNA.	10100	chr1	115611257	115611317
A_14_P201159	0.00159358	1.62613e-05	down	1.18722	-1.18722	-0.247589	TSPAN2	Homo sapiens tetraspanin 2 (TSPAN2), mRNA.	10100	chr1	115621854	115621914
A_16_P00064457	0.0159859	0.00109641	up	1.11112	1.11112	0.152012	TTC39A	Homo sapiens tetratricopeptide repeat domain 39A (TTC39A), transcript variant 1, mRNA.		chr1	51807392	51807452
A_16_P15002406	0.0264735	0.00258318	down	1.06992	-1.06992	-0.0975048	TTLL10	Homo sapiens tubulin tyrosine ligase-like family, member 10 (TTLL10), transcript variant 1, mRNA.	254173	chr1	1131874	1131919
A_14_P125989	0.0130419	0.000773242	down	1.06992	-1.06992	-0.0975064	TTLL7	Homo sapiens tubulin tyrosine ligase-like family, member 7 (TTLL7), mRNA.	79739	chr1	84459832	84459892
A_14_P134593	0.0203308	0.00165543	down	1.0919	-1.0919	-0.126844	TTLL7	Homo sapiens tubulin tyrosine ligase-like family, member 7 (TTLL7), mRNA.	79739	chr1	84348321	84348381
A_16_P00110479	0.0148657	0.000968848	down	1.12565	-1.12565	-0.170758	TTLL7	Homo sapiens tubulin tyrosine ligase-like family, member 7 (TTLL7), mRNA.	79739	chr1	84386750	84386810
A_16_P35204420	0.00882591	0.000394759	down	1.11602	-1.11602	-0.158357	TTLL7	Homo sapiens tubulin tyrosine ligase-like family, member 7 (TTLL7), mRNA.	79739	chr1	84423992	84424052
A_16_P00065366	0.0291367	0.00303081	up	1.09654	1.09654	0.132962	TXNDC12	Homo sapiens thioredoxin domain containing 12 (endoplasmic reticulum) (TXNDC12), mRNA.	51060	chr1	52507241	52507301
A_16_P35126398	0.0324585	0.00362829	down	1.07673	-1.07673	-0.106654	TXNDC12	Homo sapiens thioredoxin domain containing 12 (endoplasmic reticulum) (TXNDC12), mRNA.	51060	chr1	52516116	52516176
A_14_P110762	0.00105793	7.048e-06	down	1.20422	-1.20422	-0.268093	TYW3	Homo sapiens tRNA-yW synthesizing protein 3 homolog (S. cerevisiae) (TYW3), transcript variant 2, mRNA.	127253	chr1	75230888	75230948
A_16_P15300426	0.0181468	0.00136589	up	1.11827	1.11827	0.161275	UBAP2L	Homo sapiens ubiquitin associated protein 2-like (UBAP2L), transcript variant 2, mRNA.	9898	chr1	154231398	154231458
A_16_P00000572	0.0480379	0.00694384	down	1.11309	-1.11309	-0.154566	UBE2J2	Homo sapiens ubiquitin-conjugating enzyme E2, J2 (UBC6 homolog, yeast) (UBE2J2), transcript variant 2, mRNA.	118424	chr1	1198361	1198421
A_16_P00082728	0.0192154	0.00150426	down	1.07012	-1.07012	-0.0977761	UBE2U	Homo sapiens ubiquitin-conjugating enzyme E2U (putative) (UBE2U), mRNA.	148581	chr1	64686550	64686610
A_14_P101325	0.016217	0.00112372	up	1.21017	1.21017	0.275215	UBE2U	Homo sapiens ubiquitin-conjugating enzyme E2U (putative) (UBE2U), mRNA.	148581	chr1	64698296	64698356
A_16_P15148772	0.00398274	9.37239e-05	down	1.11906	-1.11906	-0.162287	UBE2U	Homo sapiens ubiquitin-conjugating enzyme E2U (putative) (UBE2U), mRNA.	148581	chr1	64709777	64709837
A_14_P124250	0.0380994	0.00472681	down	1.17334	-1.17334	-0.230617	UBE4B	Homo sapiens ubiquitination factor E4B (UFD2 homolog, yeast) (UBE4B), transcript variant 1, mRNA.	10277	chr1	10240817	10240877
A_16_P15046657	0.0157533	0.00106972	up	1.21219	1.21219	0.27761	UBR4	Homo sapiens ubiquitin protein ligase E3 component n-recognin 4 (UBR4), mRNA.	23352	chr1	19463959	19464019
A_16_P00220951	0.0324585	0.00362829	down	1.14413	-1.14413	-0.194255	UCHL5	Homo sapiens ubiquitin carboxyl-terminal hydrolase L5 (UCHL5), mRNA.	51377	chr1	193027480	193027540
A_14_P130683	0.0380994	0.00472681	down	1.08161	-1.08161	-0.113186	UCHL5	Homo sapiens ubiquitin carboxyl-terminal hydrolase L5 (UCHL5), mRNA.	51377	chr1	193016408	193016468
A_14_P138122	0.0206135	0.00169535	down	1.14102	-1.14102	-0.19033	UCK2	Homo sapiens uridine-cytidine kinase 2 (UCK2), mRNA.	7371	chr1	165801335	165801395
A_14_P108960	0.00770608	0.000310543	up	1.11853	1.11853	0.161602	UCK2	Homo sapiens uridine-cytidine kinase 2 (UCK2), mRNA.	7371	chr1	165823210	165823270
A_16_P00253457	0.00993265	0.000487087	up	1.18691	1.18691	0.247214	USH2A	Homo sapiens Usher syndrome 2A (autosomal recessive, mild) (USH2A), transcript variant 2, mRNA.	7399	chr1	215963392	215963452
A_16_P15446315	0.0299319	0.00317112	up	1.21556	1.21556	0.281623	USH2A	Homo sapiens Usher syndrome 2A (autosomal recessive, mild) (USH2A), transcript variant 2, mRNA.	7399	chr1	216073538	216073598
A_16_P00253394	0.0417366	0.00549888	up	1.14825	1.14825	0.199432	USH2A	Homo sapiens Usher syndrome 2A (autosomal recessive, mild) (USH2A), transcript variant 2, mRNA.	7399	chr1	215931966	215932026
A_16_P35466468	0.00683881	0.00025011	up	1.1592	1.1592	0.21313	USH2A	Homo sapiens Usher syndrome 2A (autosomal recessive, mild) (USH2A), transcript variant 2, mRNA.	7399	chr1	216579906	216579966
A_16_P00253410	0.0142069	0.000899058	up	1.16332	1.16332	0.218245	USH2A	Homo sapiens Usher syndrome 2A (autosomal recessive, mild) (USH2A), transcript variant 2, mRNA.	7399	chr1	215939940	215940000
A_16_P00253332	0.00292669	5.37196e-05	up	1.21542	1.21542	0.281451	USH2A	Homo sapiens Usher syndrome 2A (autosomal recessive, mild) (USH2A), transcript variant 2, mRNA.	7399	chr1	215900258	215900318
A_14_P108872	0.0422732	0.00561802	up	1.11332	1.11332	0.154866	USH2A	Homo sapiens Usher syndrome 2A (autosomal recessive, mild) (USH2A), transcript variant 2, mRNA.	7399	chr1	216465608	216465666
A_16_P35465198	0.0257585	0.00246688	up	1.16192	1.16192	0.216511	USH2A	Homo sapiens Usher syndrome 2A (autosomal recessive, mild) (USH2A), transcript variant 2, mRNA.	7399	chr1	216098861	216098921
A_14_P201788	0.00964564	0.000462282	up	1.12625	1.12625	0.171523	USP1	Homo sapiens ubiquitin specific peptidase 1 (USP1), transcript variant 2, mRNA.	7398	chr1	62916540	62916600
A_16_P15126291	0.0386297	0.00483074	up	1.08381	1.08381	0.116114	USP24	Homo sapiens ubiquitin specific peptidase 24 (USP24), mRNA.	23358	chr1	55555695	55555755
A_16_P35133806	0.0019826	2.44098e-05	down	1.16545	-1.16545	-0.220882	USP24	Homo sapiens ubiquitin specific peptidase 24 (USP24), mRNA.	23358	chr1	55571071	55571131
A_16_P15052814	0.00964564	0.000462282	up	1.15211	1.15211	0.204279	USP48	Homo sapiens ubiquitin specific peptidase 48 (USP48), transcript variant 1, mRNA.	84196	chr1	22108319	22108379
A_14_P105400	0.0346805	0.0040542	up	1.15616	1.15616	0.209344	USP48	Homo sapiens ubiquitin specific peptidase 48 (USP48), transcript variant 1, mRNA.	84196	chr1	22078992	22079052
A_14_P112796	0.00458886	0.000121287	down	1.1093	-1.1093	-0.149646	VANGL1	Homo sapiens vang-like 1 (van gogh, Drosophila) (VANGL1), mRNA.	81839	chr1	116211722	116211782
A_16_P00152986	0.01382	0.000855151	down	1.1323	-1.1323	-0.179261	VANGL1	Homo sapiens vang-like 1 (van gogh, Drosophila) (VANGL1), mRNA.	81839	chr1	116224998	116225058
A_16_P00142739	0.00238881	3.63543e-05	up	1.14545	1.14545	0.195908	VAV3	Homo sapiens vav 3 guanine nucleotide exchange factor (VAV3), transcript variant 1, mRNA.	10451	chr1	108281453	108281513
A_16_P00142904	0.00595495	0.000195372	down	1.12396	-1.12396	-0.168586	VAV3	Homo sapiens vav 3 guanine nucleotide exchange factor (VAV3), transcript variant 1, mRNA.	10451	chr1	108374586	108374646
A_16_P15250469	0.0211963	0.00177786	down	1.09407	-1.09407	-0.129708	VAV3	Homo sapiens vav 3 guanine nucleotide exchange factor (VAV3), transcript variant 1, mRNA.	10451	chr1	108368301	108368361
A_14_P131752	0.0113969	0.000614846	down	1.09528	-1.09528	-0.131301	VAV3	Homo sapiens vav 3 guanine nucleotide exchange factor (VAV3), transcript variant 2, mRNA.	10451	chr1	108231009	108231069
A_16_P35260200	0.0132204	0.000793006	down	1.09698	-1.09698	-0.133535	VAV3	Homo sapiens vav 3 guanine nucleotide exchange factor (VAV3), transcript variant 1, mRNA.	10451	chr1	108235896	108235956
A_16_P15250571	0.0253887	0.00241054	down	1.09486	-1.09486	-0.130752	VAV3	Homo sapiens vav 3 guanine nucleotide exchange factor (VAV3), transcript variant 1, mRNA.	10451	chr1	108411973	108412033
A_16_P15250458	0.0102667	0.000513128	down	1.0933	-1.0933	-0.128686	VAV3	Homo sapiens vav 3 guanine nucleotide exchange factor (VAV3), transcript variant 1, mRNA.	10451	chr1	108361800	108361860
A_16_P15250513	0.0499507	0.00739309	down	1.09012	-1.09012	-0.124481	VAV3	Homo sapiens vav 3 guanine nucleotide exchange factor (VAV3), transcript variant 1, mRNA.	10451	chr1	108393419	108393479
A_16_P00142935	0.0366139	0.00442706	up	1.12802	1.12802	0.173788	VAV3	Homo sapiens vav 3 guanine nucleotide exchange factor (VAV3), transcript variant 1, mRNA.	10451	chr1	108404167	108404227
A_16_P15250406	0.0236999	0.00214613	up	1.19117	1.19117	0.252385	VAV3	Homo sapiens vav 3 guanine nucleotide exchange factor (VAV3), transcript variant 1, mRNA.	10451	chr1	108339812	108339872
A_14_P123596	0.0283729	0.00289619	down	1.06167	-1.06167	-0.0863413	VAV3	Homo sapiens vav 3 guanine nucleotide exchange factor (VAV3), transcript variant 1, mRNA.	10451	chr1	108291661	108291721
A_16_P35260089	0.0283729	0.00289619	up	1.15043	1.15043	0.202178	VAV3	Homo sapiens vav 3 guanine nucleotide exchange factor (VAV3), transcript variant 2, mRNA.	10451	chr1	108202540	108202600
A_14_P138756	0.0243671	0.00224853	up	1.18854	1.18854	0.24919	VPS45	Homo sapiens vacuolar protein sorting 45 homolog (S. cerevisiae) (VPS45), mRNA.	11311	chr1	150100663	150100723
A_16_P15291143	0.00398274	9.37239e-05	up	1.17242	1.17242	0.229486	VPS45	Homo sapiens vacuolar protein sorting 45 homolog (S. cerevisiae) (VPS45), mRNA.	11311	chr1	150075732	150075792
A_14_P110081	0.0312139	0.0033927	up	1.10039	1.10039	0.138011	VPS72	Homo sapiens vacuolar protein sorting 72 homolog (S. cerevisiae) (VPS72), mRNA.	6944	chr1	151152811	151152868
A_16_P15272204	0.0173928	0.00126993	down	1.09507	-1.09507	-0.131021	VTCN1	Homo sapiens V-set domain containing T cell activation inhibitor 1 (VTCN1), mRNA.	79679	chr1	117712667	117712727
A_16_P15049331	0.00908792	0.000416169	down	1.08075	-1.08075	-0.112033	VWA5B1	Homo sapiens von Willebrand factor A domain containing 5B1 (VWA5B1), mRNA.		chr1	20650133	20650193
A_14_P118606	0.0181468	0.00136589	down	1.07503	-1.07503	-0.104372	WARS2	Homo sapiens tryptophanyl tRNA synthetase 2, mitochondrial (WARS2), nuclear gene encoding mitochondrial protein, transcript variant 1, mRNA.	10352	chr1	119614960	119615020
A_14_P137367	0.0226946	0.00200052	up	1.12411	1.12411	0.168786	WASF2	Homo sapiens WAS protein family, member 2 (WASF2), mRNA.	10163	chr1	27773329	27773389
A_16_P00264286	0.0200468	0.00161638	up	1.11363	1.11363	0.155269	WDR26	Homo sapiens WD repeat domain 26 (WDR26), transcript variant 2, mRNA.	80232	chr1	224599174	224599234
A_14_P129771	0.0356416	0.00423691	down	1.07892	-1.07892	-0.109582	WDR3	Homo sapiens WD repeat domain 3 (WDR3), mRNA.	10885	chr1	118501890	118501950
A_16_P15273918	0.00177226	1.96336e-05	down	1.12963	-1.12963	-0.17585	WDR3	Homo sapiens WD repeat domain 3 (WDR3), mRNA.	10885	chr1	118477008	118477068
A_16_P15253017	0.0211963	0.00177786	down	1.09495	-1.09495	-0.130869	WDR47	Homo sapiens WD repeat domain 47 (WDR47), transcript variant 1, mRNA.	22911	chr1	109518489	109518549
A_16_P00144226	0.0283729	0.00289619	down	1.36354	-1.36354	-0.447361	WDR47	Homo sapiens WD repeat domain 47 (WDR47), transcript variant 1, mRNA.	22911	chr1	109573266	109573326
A_16_P15508706	0.0110621	0.000584017	up	1.1473	1.1473	0.198246	WDR64	Homo sapiens WD repeat domain 64 (WDR64), mRNA.	128025	chr1	241920550	241920610
A_16_P00288473	0.0176383	0.0013012	up	1.21725	1.21725	0.283624	WDR64	Homo sapiens WD repeat domain 64 (WDR64), mRNA.	128025	chr1	241850783	241850843
A_16_P00086537	0.0412187	0.00538204	up	1.07651	1.07651	0.106356	WDR78	Homo sapiens WD repeat domain 78 (WDR78), transcript variant 1, mRNA.	79819	chr1	67327885	67327945
A_16_P35163207	0.0257585	0.00246688	down	1.07231	-1.07231	-0.100722	WDR78	Homo sapiens WD repeat domain 78 (WDR78), transcript variant 1, mRNA.	79819	chr1	67370961	67371021
A_14_P133471	0.0375783	0.00462491	up	1.03968	1.03968	0.0561463	WNT2B	Homo sapiens wingless-type MMTV integration site family, member 2B (WNT2B), transcript variant WNT-2B1, mRNA.	7482	chr1	113031579	113031639
A_16_P15261553	0.0316176	0.00346964	down	1.0979	-1.0979	-0.134746	WNT2B	Homo sapiens wingless-type MMTV integration site family, member 2B (WNT2B), transcript variant WNT-2B1, mRNA.	7482	chr1	113042697	113042757
A_14_P106999	0.00254429	4.10294e-05	up	1.1701	1.1701	0.226634	WNT3A	Homo sapiens wingless-type MMTV integration site family, member 3A (WNT3A), mRNA.	89780	chr1	228207098	228207158
A_16_P00268855	0.00770608	0.000310543	down	1.12394	-1.12394	-0.168564	WNT3A	Homo sapiens wingless-type MMTV integration site family, member 3A (WNT3A), mRNA.	89780	chr1	228223790	228223845
A_14_P102758	0.0075986	0.000302303	up	1.1568	1.1568	0.210137	XCL1	Homo sapiens chemokine (C motif) ligand 1 (XCL1), mRNA.	6375	chr1	168547629	168547689
A_16_P15361389	0.0433107	0.0058633	up	1.11098	1.11098	0.151827	XPR1	Homo sapiens xenotropic and polytropic retrovirus receptor (XPR1), transcript variant 2, mRNA.	9213	chr1	180616644	180616704
A_14_P125725	0.000532575	1.76845e-06	up	1.46048	1.46048	0.54644	XPR1	Homo sapiens xenotropic and polytropic retrovirus receptor (XPR1), transcript variant 2, mRNA.	9213	chr1	180794024	180794084
A_16_P15361666	0.00212862	2.84776e-05	up	1.21023	1.21023	0.275283	XPR1	Homo sapiens xenotropic and polytropic retrovirus receptor (XPR1), transcript variant 2, mRNA.	9213	chr1	180781142	180781202
A_14_P134666	0.00993265	0.000487087	up	1.13611	1.13611	0.184109	XPR1	Homo sapiens xenotropic and polytropic retrovirus receptor (XPR1), transcript variant 2, mRNA.	9213	chr1	180702499	180702559
A_16_P00067717	0.0186711	0.00143354	up	1.10556	1.10556	0.144783	YIPF1	Homo sapiens Yip1 domain family, member 1 (YIPF1), mRNA.	54432	chr1	54348761	54348821
A_14_P129609	0.00159358	1.62613e-05	down	1.33729	-1.33729	-0.419312	YTHDF2	Homo sapiens YTH domain family, member 2 (YTHDF2), mRNA.	51441	chr1	29064090	29064140
A_16_P00028517	0.0316176	0.00346964	up	1.10737	1.10737	0.147135	ZBTB40	Homo sapiens zinc finger and BTB domain containing 40 (ZBTB40), transcript variant 1, mRNA.	9923	chr1	22843272	22843332
A_14_P117907	0.0211963	0.00177786	down	1.09591	-1.09591	-0.132123	ZBTB41	Homo sapiens zinc finger and BTB domain containing 41 (ZBTB41), mRNA.	360023	chr1	197128835	197128895
A_16_P15400057	0.0328606	0.00371007	down	1.1115	-1.1115	-0.152507	ZBTB41	Homo sapiens zinc finger and BTB domain containing 41 (ZBTB41), mRNA.	360023	chr1	197153270	197153330
A_16_P15302189	0.0333342	0.00379352	up	1.12496	1.12496	0.169878	ZBTB7B	Homo sapiens zinc finger and BTB domain containing 7B (ZBTB7B), mRNA.	51043	chr1	154975572	154975620
A_16_P15076413	0.00542561	0.000165367	up	1.16436	1.16436	0.219536	ZBTB8A	Homo sapiens zinc finger and BTB domain containing 8A (ZBTB8A), mRNA.		chr1	33033044	33033104
A_14_P131701	0.00322769	6.41579e-05	up	1.1564	1.1564	0.209634	ZC3H11A	Homo sapiens zinc finger CCCH-type containing 11A (ZC3H11A), mRNA.	9877	chr1	203785990	203786050
A_16_P00236243	0.0171518	0.00123935	up	1.12742	1.12742	0.173027	ZC3H11A	Homo sapiens zinc finger CCCH-type containing 11A (ZC3H11A), mRNA.	9877	chr1	203791740	203791800
A_16_P15120393	0.0102667	0.000513128	up	1.12346	1.12346	0.167949	ZCCHC11	Homo sapiens zinc finger, CCHC domain containing 11 (ZCCHC11), transcript variant 1, mRNA.	23318	chr1	53004688	53004747
A_16_P15120389	0.0110621	0.000584017	up	1.11017	1.11017	0.150783	ZCCHC11	Homo sapiens zinc finger, CCHC domain containing 11 (ZCCHC11), transcript variant 1, mRNA.	23318	chr1	52998423	52998483
A_14_P116228	0.00362795	7.87597e-05	up	1.16301	1.16301	0.217868	ZCCHC17	Homo sapiens zinc finger, CCHC domain containing 17 (ZCCHC17), mRNA.	51538	chr1	31827547	31827607
A_16_P15073786	0.00222307	3.12194e-05	up	1.21951	1.21951	0.286302	ZCCHC17	Homo sapiens zinc finger, CCHC domain containing 17 (ZCCHC17), mRNA.	51538	chr1	31792006	31792066
A_16_P15119566	0.0342432	0.00396555	down	1.09924	-1.09924	-0.136509	ZFYVE9	Homo sapiens zinc finger, FYVE domain containing 9 (ZFYVE9), transcript variant 2, mRNA.	9372	chr1	52609422	52609482
A_14_P101368	0.00292669	5.37196e-05	down	1.14685	-1.14685	-0.197673	ZFYVE9	Homo sapiens zinc finger, FYVE domain containing 9 (ZFYVE9), transcript variant 2, mRNA.	9372	chr1	52703531	52703591
A_16_P15082565	0.00542561	0.000165367	up	1.14213	1.14213	0.191725	ZMYM4	Homo sapiens zinc finger, MYM-type 4 (ZMYM4), mRNA.	9202	chr1	35781852	35781912
A_16_P15082515	0.0106111	0.000540462	up	1.17518	1.17518	0.232877	ZMYM4	Homo sapiens zinc finger, MYM-type 4 (ZMYM4), mRNA.	9202	chr1	35753782	35753842
A_14_P119977	0.00137167	1.22186e-05	up	1.24105	1.24105	0.311557	ZNF281	Homo sapiens zinc finger protein 281 (ZNF281), mRNA.	23528	chr1	200376184	200376244
A_16_P15210099	0.0312139	0.0033927	down	1.12551	-1.12551	-0.170574	ZNF326	Homo sapiens zinc finger protein 326 (ZNF326), transcript variant 1, mRNA.	284695	chr1	90482906	90482966
A_14_P121708	0.00693312	0.00025701	down	1.59763	-1.59763	-0.675932	ZNF326	Homo sapiens zinc finger protein 326 (ZNF326), transcript variant 3, mRNA.	284695	chr1	90461397	90461457
A_16_P15212250	0.0386297	0.00483074	down	1.07425	-1.07425	-0.103326	ZNF644	Homo sapiens zinc finger protein 644 (ZNF644), transcript variant 2, mRNA.	84146	chr1	91390421	91390481
A_16_P15212360	0.00316725	6.22943e-05	up	1.12819	1.12819	0.174005	ZNF644	Homo sapiens zinc finger protein 644 (ZNF644), transcript variant 2, mRNA.	84146	chr1	91432987	91433047
A_16_P15212332	0.00964564	0.000462282	down	1.10359	-1.10359	-0.142209	ZNF644	Homo sapiens zinc finger protein 644 (ZNF644), transcript variant 2, mRNA.	84146	chr1	91413644	91413704
A_14_P110876	0.0037506	8.3477e-05	down	1.11966	-1.11966	-0.163058	ZNF644	Homo sapiens zinc finger protein 644 (ZNF644), transcript variant 2, mRNA.	84146	chr1	91381161	91381221
A_16_P15474066	0.0279629	0.00283095	up	1.09244	1.09244	0.127554	ZNF678	Homo sapiens zinc finger protein 678 (ZNF678), transcript variant 1, mRNA.	339500	chr1	227784746	227784806
A_16_P35493638	0.0178973	0.00133319	up	1.14426	1.14426	0.194412	ZNF678	Homo sapiens zinc finger protein 678 (ZNF678), transcript variant 1, mRNA.	339500	chr1	227790275	227790335
A_14_P108791	0.00430443	0.000108206	down	1.08865	-1.08865	-0.122546	ZNF683	Homo sapiens zinc finger protein 683 (ZNF683), transcript variant 1, mRNA.	257101	chr1	26690586	26690641
A_14_P116853	0.0450598	0.00624935	down	1.02333	-1.02333	-0.0332701	ZNF691	Homo sapiens zinc finger protein 691 (ZNF691), mRNA.	51058	chr1	43315291	43315342
A_16_P00158373	0.0264735	0.00258318	up	1.25824	1.25824	0.331412	ZNF697	Homo sapiens zinc finger protein 697 (ZNF697), mRNA.	90874	chr1	120176922	120176982
A_16_P15277752	0.0295122	0.00310024	down	1.08784	-1.08784	-0.121472	ZNF697	Homo sapiens zinc finger protein 697 (ZNF697), mRNA.	90874	chr1	120185432	120185492
A_14_P120126	0.0499507	0.00739309	down	1.08542	-1.08542	-0.118258	ZNHIT6	Homo sapiens zinc finger, HIT type 6 (ZNHIT6), transcript variant 2, mRNA.		chr1	86142948	86143006
A_14_P115724	0.0220936	0.00190855	down	1.07469	-1.07469	-0.103924	ZRANB2	Homo sapiens zinc finger, RAN-binding domain containing 2 (ZRANB2), transcript variant 2, mRNA.	9406	chr1	71544126	71544186
A_16_P15078431	0.00206755	2.67786e-05	up	1.29207	1.29207	0.36968	ZSCAN20	Homo sapiens zinc finger and SCAN domain containing 20 (ZSCAN20), mRNA.	7579	chr1	33946323	33946381
A_16_P15120999	0.00392519	9.10562e-05	down	1.1208	-1.1208	-0.164527	ZYG11A	Homo sapiens zyg-11 homolog A (C. elegans) (ZYG11A), mRNA.	440590	chr1	53329585	53329645
A_14_P126854	0.0194917	0.00154081	down	1.07443	-1.07443	-0.103574	ZYG11B	Homo sapiens zyg-11 homolog B (C. elegans) (ZYG11B), mRNA.	79699	chr1	53207689	53207749
A_16_P35128040	0.00251033	3.98099e-05	down	1.17903	-1.17903	-0.237599	ZYG11B	Homo sapiens zyg-11 homolog B (C. elegans) (ZYG11B), mRNA.	79699	chr1	53267579	53267639
A_16_P00066191	0.0140134	0.000876849	down	1.13265	-1.13265	-0.179703	ZYG11B	Homo sapiens zyg-11 homolog B (C. elegans) (ZYG11B), mRNA.	79699	chr1	53237183	53237243
A_14_P133995	0.0108926	0.000569148	down	1.09221	-1.09221	-0.127257	ZZZ3	Homo sapiens zinc finger, ZZ-type containing 3 (ZZZ3), mRNA.	26009	chr1	78069123	78069183
A_16_P15385925	0.0462323	0.00651927	down	1.11344	-1.11344	-0.155018		Unknown		chr1	190812829	190812889
A_16_P00268296	0.0173928	0.00126993	up	1.12897	1.12897	0.175003		Unknown		chr1	227677702	227677762
A_16_P35297453	0.0140134	0.000876849	up	1.13762	1.13762	0.186022		Homo sapiens cDNA clone IMAGE:5266739.		chr1	146933411	146933471
A_16_P15158829	0.0268252	0.00264319	down	1.07102	-1.07102	-0.0989788		Unknown		chr1	68935674	68935734
A_16_P00263448	0.013608	0.000833951	up	1.1513	1.1513	0.203267		Unknown		chr1	223708137	223708197
A_16_P15186556	0.0291367	0.00303081	down	1.10637	-1.10637	-0.145834		Unknown		chr1	80936815	80936875
A_16_P35316985	0.0057769	0.000184844	up	1.19525	1.19525	0.257309		Homo sapiens endogenous virus HERV-K chromosome 5 LTR-promoted mRNA sequence.		chr1	155552144	155552204
A_16_P35198318	0.00936608	0.00043866	down	1.10501	-1.10501	-0.144064		Unknown		chr1	82130115	82130175
A_16_P15062782	0.0119295	0.000663939	up	1.13303	1.13303	0.180185		Unknown		chr1	26500407	26500467
A_16_P15134155	0.0173928	0.00126993	down	1.07908	-1.07908	-0.109808		Homo sapiens disabled-1 (DAB1) mRNA, complete cds.		chr1	58733417	58733477
A_16_P15404334	0.00783203	0.000318992	up	1.20328	1.20328	0.266969		Unknown		chr1	198838936	198838996
A_16_P00060874	0.0371031	0.00452501	up	1.13601	1.13601	0.183972		Unknown		chr1	48737385	48737445
A_16_P15314814	0.00450789	0.000117884	up	1.18555	1.18555	0.245561		Unknown		chr1	160415552	160415612
A_16_P15126656	0.0444695	0.0061182	down	1.07252	-1.07252	-0.101005		Unknown		chr1	55697159	55697219
A_16_P00066110	0.0197544	0.00157818	up	1.07735	1.07735	0.107481		Unknown		chr1	53145446	53145506
A_16_P35197824	0.00228937	3.31846e-05	down	1.15039	-1.15039	-0.202119		Unknown		chr1	81951281	81951341
A_16_P00094302	0.0206135	0.00169535	up	1.18527	1.18527	0.24522		Unknown		chr1	72879484	72879544
A_16_P15159944	0.0236999	0.00214613	up	1.15554	1.15554	0.208573		Unknown		chr1	69499239	69499299
A_14_P107198	0.0450598	0.00624935	up	1.13323	1.13323	0.180436		Unknown		chr1	199035540	199035600
A_16_P15270102	0.0233508	0.00209655	down	1.09164	-1.09164	-0.126499		Unknown		chr1	116912959	116913019
A_16_P00065456	0.0226946	0.00200052	down	1.08434	-1.08434	-0.116811		Unknown		chr1	52592437	52592497
A_16_P15035199	0.0450598	0.00624935	up	1.12126	1.12126	0.165117		Unknown		chr1	14905191	14905251
A_16_P35343859	0.00398274	9.37239e-05	up	1.23126	1.23126	0.300132		Unknown		chr1	166461120	166461180
A_16_P15339982	0.0356416	0.00423691	up	1.12947	1.12947	0.17564		Unknown		chr1	171195606	171195666
A_16_P00172635	0.00882591	0.000394759	up	1.20253	1.20253	0.266069		Unknown		chr1	158218325	158218385
A_16_P15378497	0.0380994	0.00472681	down	1.10715	-1.10715	-0.146844		Unknown		chr1	187574193	187574253
A_16_P00004677	0.0209055	0.00173615	down	1.1162	-1.1162	-0.158598		Unknown		chr1	4493042	4493102
A_16_P15186472	0.0480379	0.00694384	down	1.09502	-1.09502	-0.130961		Unknown		chr1	80908716	80908776
A_16_P15312469	0.00783203	0.000318992	up	1.1463	1.1463	0.196989		Unknown		chr1	159548450	159548510
A_16_P35203458	0.0433107	0.0058633	down	1.10049	-1.10049	-0.13815		Unknown		chr1	84089388	84089448
A_16_P15160367	0.0132204	0.000793006	up	1.12504	1.12504	0.169976		Unknown		chr1	69712054	69712114
A_16_P00081172	0.0412187	0.00538204	down	1.08115	-1.08115	-0.112565		Unknown		chr1	63645873	63645933
A_16_P15182005	0.00964564	0.000462282	down	1.12279	-1.12279	-0.167088		Homo sapiens mRNA; cDNA DKFZp686L21223 (from clone DKFZp686L21223).		chr1	79027406	79027466
A_16_P15194904	0.00586947	0.000190039	down	1.113	-1.113	-0.154459		Unknown		chr1	84128599	84128659
A_16_P15224357	0.00615105	0.000206462	up	1.24331	1.24331	0.314191		Unknown		chr1	96783349	96783409
A_16_P00184295	0.0171518	0.00123935	up	1.101	1.101	0.13881		Unknown		chr1	166755087	166755147
A_16_P15068273	0.0422732	0.00561802	up	1.10813	1.10813	0.14813		Unknown		chr1	29193350	29193408
A_16_P00023482	0.0356416	0.00423691	down	1.11356	-1.11356	-0.155174		Unknown		chr1	19121256	19121316
A_16_P00148946	0.0386297	0.00483074	down	1.12888	-1.12888	-0.174897		Unknown		chr1	112878574	112878634
A_16_P35250486	0.00882591	0.000394759	down	1.1404	-1.1404	-0.189541		Unknown		chr1	103612648	103612708
A_16_P00039744	0.0211963	0.00177786	up	1.13787	1.13787	0.186333		Unknown		chr1	32250159	32250219
A_16_P15521903	0.0366139	0.00442706	down	1.08289	-1.08289	-0.114893		Unknown		chr1	247542899	247542959
A_16_P15453777	0.0253887	0.00241054	up	1.12606	1.12606	0.171289		Unknown		chr1	218858293	218858353
A_16_P00096064	0.0450598	0.00624935	down	1.06744	-1.06744	-0.0941523		Unknown		chr1	74298461	74298521
A_16_P00004985	0.0217786	0.00186404	up	1.12982	1.12982	0.176098		Unknown		chr1	4687362	4687422
A_16_P15396195	0.0438892	0.00598953	down	1.07327	-1.07327	-0.102017		Unknown		chr1	195406111	195406171
A_14_P112929	0.000440162	1.04557e-06	down	1.14839	-1.14839	-0.199616		Unknown		chr1	84512202	84512262
A_16_P35410429	0.0499507	0.00739309	down	1.07614	-1.07614	-0.105863		Unknown		chr1	194257398	194257458
A_16_P15415209	0.0233508	0.00209655	up	1.09007	1.09007	0.124423		Unknown		chr1	203060746	203060804
A_16_P15310648	0.0146462	0.000945046	up	1.14301	1.14301	0.192843		Unknown		chr1	158673816	158673876
A_16_P35216083	0.0123084	0.000698666	up	1.11266	1.11266	0.154017		Unknown		chr1	89110668	89110728
A_16_P15382915	0.0178973	0.00133319	down	1.10571	-1.10571	-0.144972		Unknown		chr1	189562214	189562274
A_16_P00032102	0.0173928	0.00126993	up	1.14788	1.14788	0.198976		Homo sapiens chromosome 1 open reading frame 63, mRNA (cDNA clone MGC:43558 IMAGE:5269181), complete cds.		chr1	25663498	25663551
A_16_P15009093	0.0150913	0.000993204	down	1.12953	-1.12953	-0.175721		Unknown		chr1	3567742	3567791
A_16_P35312111	0.0351611	0.00414464	up	1.10549	1.10549	0.14468		Unknown		chr1	153690153	153690211
A_16_P00107250	0.0173928	0.00126993	down	1.11045	-1.11045	-0.15114		Unknown		chr1	82155777	82155837
A_16_P35273120	0.0492988	0.00724052	up	1.03484	1.03484	0.0494097		Unknown		chr1	113320222	113320282
A_16_P00165327	0.0406627	0.00526743	up	1.11034	1.11034	0.150997		Unknown		chr1	152619305	152619365
A_16_P15165198	0.0200468	0.00161638	down	1.07488	-1.07488	-0.104182		Unknown		chr1	71800904	71800964
A_16_P03808083	0.0380994	0.00472681	down	1.0495	-1.0495	-0.069708		Unknown		chr1	1529946	1529992
A_16_P35060458	0.00212862	2.84776e-05	up	1.20204	1.20204	0.265488		Unknown		chr1	23812392	23812450
A_16_P15156793	0.0351611	0.00414464	down	1.06203	-1.06203	-0.0868296		Homo sapiens protein transactivated by hepatitis B virus E antigen mRNA, complete cds.		chr1	68084364	68084424
A_16_P00033270	0.0351611	0.00414464	up	1.112	1.112	0.153152		Unknown		chr1	26679997	26680055
A_16_P15215033	0.00615105	0.000206462	down	1.14665	-1.14665	-0.197426		Unknown		chr1	92656061	92656121
A_16_P15165297	0.000312269	4.10063e-07	down	1.14042	-1.14042	-0.189569		Unknown		chr1	71849400	71849460
A_16_P15253777	0.0468282	0.00665813	down	1.10743	-1.10743	-0.147217		Unknown		chr1	109830218	109830278
A_16_P00060586	0.0181468	0.00136589	down	1.08473	-1.08473	-0.117342		Unknown		chr1	48508981	48509041
A_16_P35074184	0.0422732	0.00561802	down	1.05942	-1.05942	-0.0832756		Unknown		chr1	29834288	29834348
A_14_P130552	0.0456356	0.00638302	up	1.08353	1.08353	0.115743		H.sapiens mRNA for fibromodulin.		chr1	203160346	203160406
A_16_P00214317	0.0320304	0.00354816	down	1.08776	-1.08776	-0.121362		Unknown		chr1	188105414	188105474
A_16_P35218654	0.0189459	0.00146851	down	1.08444	-1.08444	-0.116944		Unknown		chr1	90270145	90270205
A_16_P00074217	0.00895595	0.000405332	down	1.08123	-1.08123	-0.112676		Homo sapiens disabled-1 (DAB1) mRNA, complete cds.		chr1	58852375	58852435
A_14_P100140	0.00369032	8.10859e-05	up	1.3512	1.3512	0.434242		Unknown		chr1	96501556	96501616
A_16_P15313786	0.0486394	0.00709079	up	1.11921	1.11921	0.162479		Unknown		chr1	160046344	160046404
A_14_P116394	0.00386414	8.84604e-05	down	1.10888	-1.10888	-0.1491		Unknown		chr1	89137657	89137717
A_16_P35186086	0.00430443	0.000108206	down	1.13334	-1.13334	-0.180578		Unknown		chr1	77106829	77106889
A_16_P15470519	0.0371031	0.00452501	down	1.0986	-1.0986	-0.135663		Unknown		chr1	226220438	226220498
A_16_P35378410	0.0173928	0.00126993	up	1.14266	1.14266	0.192397		Unknown		chr1	180997359	180997419
A_16_P35403701	0.0130419	0.000773242	up	1.20911	1.20911	0.27394		Unknown		chr1	191333128	191333188
A_16_P35288099	0.0337869	0.00387867	down	1.06748	-1.06748	-0.0942112		Unknown		chr1	119779941	119780001
A_16_P00262885	0.023028	0.00204802	up	1.13703	1.13703	0.185267		Unknown		chr1	222075880	222075940
A_16_P00139034	0.00416859	0.000102177	down	1.24359	-1.24359	-0.314509		Unknown		chr1	105427062	105427122
A_16_P35093848	0.0119295	0.000663939	up	1.10597	1.10597	0.145313		Unknown		chr1	38254434	38254494
A_16_P15146245	0.00247542	3.86248e-05	down	1.11886	-1.11886	-0.162024		Unknown		chr1	63713874	63713934
A_16_P00040724	0.0279629	0.00283095	up	1.16027	1.16027	0.21446		Unknown		chr1	33176174	33176234
A_16_P35289797	0.0166851	0.00118023	down	1.12051	-1.12051	-0.164153		Homo sapiens mRNA; cDNA DKFZp667F0714 (from clone DKFZp667F0714).		chr1	120409726	120409786
A_16_P00011362	0.00949395	0.000450327	down	1.1478	-1.1478	-0.198869		Homo sapiens enolase 1, (alpha), mRNA (cDNA clone MGC:60133 IMAGE:6063437), complete cds.		chr1	9194846	9194906
A_16_P15152210	0.0422732	0.00561802	down	1.04565	-1.04565	-0.0643959		Homo sapiens cDNA clone IMAGE:4795984.		chr1	66107071	66107131
A_16_P15189576	0.0119295	0.000663939	down	1.10375	-1.10375	-0.142417		Unknown		chr1	82097389	82097449
A_16_P00037164	0.0433107	0.0058633	up	1.0617	1.0617	0.0863752		Unknown		chr1	30262251	30262311
A_16_P00120120	0.0342432	0.00396555	down	1.08302	-1.08302	-0.115059		Unknown		chr1	91171662	91171722
A_16_P15455034	0.0391604	0.00493672	up	1.16073	1.16073	0.21503		Unknown		chr1	219410472	219410532
A_16_P00173015	0.0132204	0.000793006	up	1.16922	1.16922	0.225543		Unknown		chr1	158552014	158552074
A_14_P123036	0.0148657	0.000968848	up	1.1746	1.1746	0.232167		Homo sapiens endogenous virus HERV-K chromosome 5 LTR-promoted mRNA sequence.		chr1	154874821	154874881
A_16_P15323004	0.0366139	0.00442706	down	1.10417	-1.10417	-0.142961		Unknown		chr1	164029356	164029416
A_14_P131124	0.0433107	0.0058633	down	1.08299	-1.08299	-0.115024		Unknown		chr1	210499371	210499431
A_16_P00084045	0.00404177	9.64654e-05	down	1.11097	-1.11097	-0.151816		Unknown		chr1	65553711	65553771
A_16_P15186755	0.0176383	0.0013012	down	1.08784	-1.08784	-0.121465		Unknown		chr1	81004953	81005013
A_16_P15341197	0.0474384	0.00679964	up	1.13572	1.13572	0.183603		Unknown		chr1	171791106	171791166
A_16_P35169176	0.0366139	0.00442706	down	1.06089	-1.06089	-0.085276		Unknown		chr1	70031097	70031157
A_16_P00056839	0.0275847	0.00276705	up	1.07522	1.07522	0.104633		Unknown		chr1	45311696	45311756
A_16_P15398904	0.00726985	0.000278796	up	1.23653	1.23653	0.306302		Unknown		chr1	196616622	196616682
A_16_P15213440	0.0272173	0.00270447	down	1.0748	-1.0748	-0.104062		Unknown		chr1	92025351	92025411
A_16_P15405369	0.0257585	0.00246688	up	1.15376	1.15376	0.206348		Unknown		chr1	199240817	199240877
A_16_P15224657	0.0444695	0.0061182	down	1.08021	-1.08021	-0.111314		Unknown		chr1	96936955	96937015
A_16_P00145979	0.00683881	0.00025011	down	1.14095	-1.14095	-0.190235		Unknown		chr1	110790634	110790694
A_16_P00241712	0.00653017	0.000230439	down	1.20957	-1.20957	-0.274488		Unknown		chr1	207981974	207982034
A_14_P108213	0.0486394	0.00709079	down	1.07171	-1.07171	-0.0999176		Unknown		chr1	172887627	172887687
A_16_P35482235	0.0272173	0.00270447	down	1.07191	-1.07191	-0.10018		Unknown		chr1	222790135	222790180
A_14_P131269	0.0192154	0.00150426	down	1.08981	-1.08981	-0.124083		Unknown		chr1	105546927	105546987
A_16_P00142362	0.0150913	0.000993204	up	1.06625	1.06625	0.0925415		Unknown		chr1	108049356	108049416
A_14_P119431	0.00632869	0.000218141	down	1.11499	-1.11499	-0.157027		Unknown		chr1	89797570	89797630
A_16_P00181631	0.0386297	0.00483074	up	1.10218	1.10218	0.140361		Homo sapiens cDNA FLJ52874 complete cds, highly similar to Pre-B-cell leukemia transcription factor 1.		chr1	164823024	164823084
A_16_P15147377	0.00316725	6.22943e-05	down	1.12623	-1.12623	-0.171499		Unknown		chr1	64191994	64192054
A_16_P35344640	0.0189459	0.00146851	up	1.13462	1.13462	0.182208		Homo sapiens clone TESTIS-603 mRNA sequence.		chr1	166857612	166857672
A_16_P15294221	0.0112314	0.000599247	up	1.12113	1.12113	0.164952		Unknown		chr1	151481116	151481176
A_16_P35230215	0.00404177	9.64654e-05	up	1.09685	1.09685	0.133365		Unknown		chr1	95169891	95169951
A_16_P15311595	0.0474384	0.00679964	up	1.13028	1.13028	0.176677		Unknown		chr1	159109757	159109817
A_16_P00002441	0.0133989	0.00081324	down	1.05585	-1.05585	-0.0784056		Unknown		chr1	2947909	2947969
A_16_P35178073	0.0275847	0.00276705	down	1.10073	-1.10073	-0.138464		Unknown		chr1	73665142	73665198
A_16_P00031365	0.0396677	0.00504481	up	1.12815	1.12815	0.173959		Unknown		chr1	25044862	25044922
A_16_P15345953	0.00869282	0.000384443	up	1.1422	1.1422	0.19181		Homo sapiens clone FLB1413 PRO0309 mRNA, complete cds.		chr1	173975406	173975466
A_16_P15255965	0.00301972	5.70058e-05	up	1.10625	1.10625	0.145678		Unknown		chr1	110667729	110667789
A_16_P15177950	0.0480379	0.00694384	down	1.06915	-1.06915	-0.0964578		Unknown		chr1	77255268	77255328
A_16_P00201361	0.00473557	0.000128373	up	1.18934	1.18934	0.250166		Unknown		chr1	179050511	179050571
A_16_P15231209	0.0144184	0.000921786	down	1.07789	-1.07789	-0.108208		Unknown		chr1	99481461	99481521
A_16_P15380239	0.00215918	2.93651e-05	up	1.33551	1.33551	0.417388		Unknown		chr1	188335827	188335887
A_16_P15243215	0.00267899	4.49045e-05	down	1.11811	-1.11811	-0.161061		Unknown		chr1	104959795	104959855
A_16_P15415597	0.00542561	0.000165367	up	1.18692	1.18692	0.247224		H.sapiens mRNA for fibromodulin.		chr1	203208443	203208503
A_16_P00152839	0.0433107	0.0058633	up	1.0676	1.0676	0.0943693		Unknown		chr1	115908702	115908762
A_16_P15218553	0.0226946	0.00200052	up	1.106	1.106	0.145357		Unknown		chr1	94331631	94331691
A_16_P15228880	0.0113969	0.000614846	down	1.09472	-1.09472	-0.130567		Unknown		chr1	98509679	98509739
A_16_P35076324	0.0366139	0.00442706	down	1.09146	-1.09146	-0.126265		Unknown		chr1	30961047	30961107
A_16_P15392636	0.0342432	0.00396555	down	1.10192	-1.10192	-0.140016		Unknown		chr1	193823325	193823385
A_16_P15174262	0.0112314	0.000599247	down	1.07554	-1.07554	-0.105056		Unknown		chr1	75652177	75652230
A_16_P15004023	0.0422732	0.00561802	up	1.1005	1.1005	0.138163		Unknown		chr1	1867139	1867199
A_16_P00270174	0.0324585	0.00362829	up	1.15826	1.15826	0.211964		Unknown		chr1	229295676	229295736
A_16_P15102752	0.00705482	0.000264088	down	1.11497	-1.11497	-0.157003		Unknown		chr1	44607323	44607383
A_16_P15405609	0.000369868	6.57396e-07	up	1.79516	1.79516	0.844111		Unknown		chr1	199339695	199339755
A_16_P35443511	0.0401437	0.00515504	up	1.12473	1.12473	0.169581		Unknown		chr1	207461697	207461757
A_14_P111073	0.0133989	0.00081324	up	1.1416	1.1416	0.191055		Unknown		chr1	214730289	214730349
A_16_P00047431	0.0192154	0.00150426	up	1.14428	1.14428	0.194435		Unknown		chr1	38119276	38119332
A_14_P121507	0.0189459	0.00146851	down	1.09899	-1.09899	-0.136175		Unknown		chr1	101952061	101952121
A_16_P00188656	0.00466429	0.000124782	up	1.18012	1.18012	0.238931		Homo sapiens cDNA FLJ45155 fis, clone BRAWH3042816.		chr1	169749571	169749631
A_16_P15265544	0.00488325	0.000135848	down	1.16458	-1.16458	-0.219813		Unknown		chr1	114865311	114865371
A_16_P00088653	0.0462323	0.00651927	down	1.07141	-1.07141	-0.0995091		Unknown		chr1	68875890	68875950
A_16_P00070426	0.0307738	0.00331732	up	1.10312	1.10312	0.141585		Unknown		chr1	56327191	56327251
A_14_P102532	0.0337869	0.00387867	up	1.08466	1.08466	0.117238		Unknown		chr1	175850624	175850684
A_14_P116137	0.0268252	0.00264319	down	1.1024	-1.1024	-0.140651		Unknown		chr1	99258086	99258146
A_16_P15091248	0.0169113	0.00120946	up	1.10261	1.10261	0.14092		Unknown		chr1	39487283	39487343
A_16_P15245919	0.00869282	0.000384443	down	1.11416	-1.11416	-0.155954		Unknown		chr1	106451007	106451067
A_16_P00221931	0.0291367	0.00303081	up	1.11045	1.11045	0.151145		Unknown		chr1	193738957	193739017
A_16_P15228780	0.0272173	0.00270447	down	1.13048	-1.13048	-0.176934		Unknown		chr1	98481003	98481063
A_16_P00241620	0.0186711	0.00143354	down	1.10077	-1.10077	-0.138516		Homo sapiens cDNA FLJ26049 fis, clone PRS02694.		chr1	207923560	207923620
A_16_P15188779	0.0130419	0.000773242	down	1.08522	-1.08522	-0.117989		Unknown		chr1	81828148	81828208
A_16_P00125564	0.0217786	0.00186404	down	1.09187	-1.09187	-0.126806		Unknown		chr1	95245989	95246049
A_16_P00199225	0.0142069	0.000899058	up	1.15663	1.15663	0.209923		Unknown		chr1	177537223	177537283
A_16_P15297375	0.00328675	6.60743e-05	up	1.23202	1.23202	0.301031		Unknown		chr1	152831991	152832050
A_16_P15378988	0.0351611	0.00414464	up	1.21255	1.21255	0.278045		Unknown		chr1	187778933	187778993
A_16_P15223914	0.00146598	1.38802e-05	down	1.16027	-1.16027	-0.214454		Unknown		chr1	96566340	96566400
A_16_P00013104	0.0291367	0.00303081	up	1.12222	1.12222	0.166356		Unknown		chr1	10489954	10490014
A_16_P00204483	0.0108926	0.000569148	up	1.14567	1.14567	0.196187		Unknown		chr1	181421860	181421920
A_16_P15301279	0.0438892	0.00598953	up	1.11383	1.11383	0.155528		Unknown		chr1	154635075	154635135
A_16_P15189905	0.00404177	9.64654e-05	down	1.11967	-1.11967	-0.163077		Unknown		chr1	82221873	82221933
A_14_P133102	0.0312139	0.0033927	up	1.15442	1.15442	0.207174		Unknown		chr1	163184677	163184737
A_16_P15111104	0.0380994	0.00472681	up	1.08788	1.08788	0.121515		Unknown		chr1	48483976	48484036
A_16_P35151978	0.0291367	0.00303081	down	1.08957	-1.08957	-0.123763		Unknown		chr1	62885548	62885608
A_16_P00228161	0.0333342	0.00379352	up	1.12986	1.12986	0.176148		Unknown		chr1	198341593	198341653
A_16_P15315320	0.0106111	0.000540462	up	1.07282	1.07282	0.101407		Unknown		chr1	160692271	160692331
A_16_P15171529	0.024697	0.00230139	down	1.07514	-1.07514	-0.104524		Unknown		chr1	74460249	74460309
A_14_P126263	0.00297562	5.53396e-05	up	1.19464	1.19464	0.256575		Unknown		chr1	171424535	171424595
A_16_P15215582	0.0433107	0.0058633	up	1.16305	1.16305	0.217915		Unknown		chr1	92932836	92932896
A_14_P104119	0.0406627	0.00526743	down	1.07661	-1.07661	-0.106497		Unknown		chr1	90826351	90826411
A_16_P00152578	0.00251033	3.98099e-05	down	1.14466	-1.14466	-0.19492		Unknown		chr1	115761987	115762047
A_16_P35490062	0.0126753	0.000735076	up	1.18506	1.18506	0.244962		Unknown		chr1	226260174	226260234
A_16_P00152403	0.00167718	1.78718e-05	down	1.15349	-1.15349	-0.206006		Unknown		chr1	115632895	115632954
A_16_P15239536	0.0115746	0.000630822	down	1.13125	-1.13125	-0.177918		Unknown		chr1	103224416	103224476
A_16_P00000012	0.00895595	0.000405332	down	1.16571	-1.16571	-0.221204		Unknown		chr1	746619	746679
A_16_P35255708	0.0428059	0.00573948	down	1.08503	-1.08503	-0.117739		Unknown		chr1	106309102	106309162
A_16_P00106786	0.00949395	0.000450327	up	1.26359	1.26359	0.33753		Unknown		chr1	81884760	81884820
A_16_P00142411	0.0192154	0.00150426	down	1.11018	-1.11018	-0.150788		Unknown		chr1	108081153	108081213
A_16_P15389736	0.0186711	0.00143354	up	1.1885	1.1885	0.249145		Unknown		chr1	192586810	192586870
A_16_P00161262	0.0391604	0.00493672	up	1.08687	1.08687	0.120182		Unknown		chr1	147347728	147347786
A_16_P15209958	0.0155433	0.00104363	down	1.0834	-1.0834	-0.115567		Unknown		chr1	90428805	90428865
A_16_P15393732	0.0401437	0.00515504	down	1.09474	-1.09474	-0.130594		Unknown		chr1	194310044	194310104
A_16_P35223689	0.0337869	0.00387867	down	1.08008	-1.08008	-0.111133		Unknown		chr1	92380250	92380310
A_16_P15056684	0.0386297	0.00483074	up	1.11233	1.11233	0.153589		Unknown		chr1	23700514	23700574
A_14_P120254	0.0283729	0.00289619	down	1.09287	-1.09287	-0.128124		Homo sapiens cDNA FLJ40434 fis, clone TESTI2039353, moderately similar to MITOCHONDRIAL PHOSPHATE CARRIER PROTEIN PRECURSOR.		chr1	53903890	53903950
A_16_P15066494	0.0113969	0.000614846	down	1.49136	-1.49136	-0.576633		Unknown		chr1	28191635	28191695
A_16_P15147003	0.0115746	0.000630822	down	1.07489	-1.07489	-0.104189		Unknown		chr1	64053069	64053129
A_16_P15235443	0.00357048	7.64966e-05	down	1.13834	-1.13834	-0.186932		Unknown		chr1	101337885	101337945
A_16_P35378602	0.0283729	0.00289619	up	1.1066	1.1066	0.146136		Unknown		chr1	181065197	181065256
A_16_P15158645	0.00796057	0.000327657	down	1.10927	-1.10927	-0.149606		Unknown		chr1	68851557	68851617
A_16_P00038285	0.0148657	0.000968848	up	1.12903	1.12903	0.175088		Unknown		chr1	31169395	31169455
A_16_P15415035	0.00159358	1.62613e-05	up	1.17337	1.17337	0.230664		Unknown		chr1	203008468	203008528
A_16_P35233727	0.0361183	0.00433104	down	1.09489	-1.09489	-0.130784		Unknown		chr1	96625097	96625157
A_16_P00168784	0.030343	0.00324347	up	1.12088	1.12088	0.164631		Homo sapiens endogenous virus HERV-K chromosome 5 LTR-promoted mRNA sequence.		chr1	155245652	155245712
A_16_P15440557	0.00215918	2.93651e-05	up	1.27052	1.27052	0.345422		Unknown		chr1	213839975	213840035
A_16_P00124224	0.0240504	0.00219678	down	1.09526	-1.09526	-0.131272		Unknown		chr1	94346470	94346530
A_16_P35287192	0.012114	0.000681097	down	1.12381	-1.12381	-0.168394		Unknown		chr1	119419141	119419201
A_16_P00186692	0.012114	0.000681097	up	1.19254	1.19254	0.254043		Unknown		chr1	168389168	168389228
A_16_P35142519	0.00895595	0.000405332	down	1.10435	-1.10435	-0.143198		Unknown		chr1	59064150	59064210
A_16_P15408303	0.0462323	0.00651927	up	1.13819	1.13819	0.186746		Unknown		chr1	200481205	200481265
A_16_P15242102	0.00443799	0.000114571	down	1.12253	-1.12253	-0.166756		Unknown		chr1	104384174	104384234
A_16_P35268825	0.0124937	0.000716657	up	1.20693	1.20693	0.271346		Unknown		chr1	111596580	111596640
A_16_P15150800	0.000673942	2.86075e-06	down	1.16194	-1.16194	-0.216536		Unknown		chr1	65500325	65500385
A_16_P35402474	0.0433107	0.0058633	down	1.10303	-1.10303	-0.141469		Unknown		chr1	190705586	190705646
A_16_P00002078	0.0312139	0.0033927	down	1.11112	-1.11112	-0.152019		Unknown		chr1	2719524	2719584
A_14_P101186	0.0438892	0.00598953	up	1.11181	1.11181	0.152909		Homo sapiens trichohyalin, mRNA (cDNA clone IMAGE:40134116), complete cds.		chr1	152087501	152087561
A_14_P110863	0.00251033	3.98099e-05	down	1.14299	-1.14299	-0.192815		Unknown		chr1	95786687	95786747
A_16_P15240767	0.00144174	1.34457e-05	down	1.15474	-1.15474	-0.207573		Unknown		chr1	103715017	103715077
A_16_P15194313	0.0320304	0.00354816	up	1.1345	1.1345	0.182051		Unknown		chr1	83891724	83891784
A_16_P15246056	0.00551857	0.000170046	down	1.1157	-1.1157	-0.157951		Unknown		chr1	106533815	106533875
A_16_P00116019	0.0155433	0.00104363	down	1.09736	-1.09736	-0.134039		Unknown		chr1	88265547	88265607
A_16_P15320916	0.00819132	0.00034565	up	1.21291	1.21291	0.27847		Unknown		chr1	163099460	163099520
A_16_P15193450	0.00560299	0.00017485	down	1.10469	-1.10469	-0.143644		Unknown		chr1	83522641	83522701
A_16_P15151011	0.00146598	1.38802e-05	down	1.15403	-1.15403	-0.206679		Unknown		chr1	65601682	65601742
A_16_P00070081	0.0194917	0.00154081	down	1.07971	-1.07971	-0.110646		Unknown		chr1	56052998	56053058
A_16_P15234991	0.0200468	0.00161638	down	1.09363	-1.09363	-0.129127		Unknown		chr1	101092490	101092550
A_14_P118079	0.0386297	0.00483074	up	1.12834	1.12834	0.174205		Unknown		chr1	204578874	204578934
A_16_P00162171	0.0433107	0.0058633	up	1.12178	1.12178	0.165794		Unknown		chr1	150145844	150145904
A_16_P35257125	0.00560299	0.00017485	up	1.20431	1.20431	0.26821		Unknown		chr1	107028440	107028500
A_16_P15258030	0.0236999	0.00214613	down	1.09596	-1.09596	-0.132197		Unknown		chr1	111485959	111486019
A_14_P121731	0.00275843	4.7678e-05	up	1.25544	1.25544	0.328198		Unknown		chr1	204774023	204774083
A_16_P00149002	0.0366139	0.00442706	down	1.07112	-1.07112	-0.099123		Unknown		chr1	112925988	112926048
A_16_P15323284	0.00979613	0.000474534	up	1.17242	1.17242	0.229488		Unknown		chr1	164196578	164196638
A_16_P15134620	0.0324585	0.00362829	down	1.0696	-1.0696	-0.0970705		Homo sapiens disabled-1 (DAB1) mRNA, complete cds.		chr1	58929817	58929877
A_16_P00281251	0.0380994	0.00472681	up	1.1564	1.1564	0.209637		Unknown		chr1	237068123	237068183
A_16_P15207714	0.0176383	0.0013012	down	1.10783	-1.10783	-0.147737		Unknown		chr1	89374951	89375011
A_16_P15037413	0.0307738	0.00331732	up	1.13889	1.13889	0.187622		Unknown		chr1	15734735	15734795
A_16_P35108921	0.0194917	0.00154081	down	1.07325	-1.07325	-0.101985		Unknown		chr1	44508479	44508539
A_16_P35004460	0.0164415	0.00115165	down	1.09048	-1.09048	-0.124959		Unknown		chr1	1833582	1833627
A_16_P00006322	0.0243671	0.00224853	down	1.11398	-1.11398	-0.155718		Unknown		chr1	5654978	5655038
A_14_P129760	0.0312139	0.0033927	down	1.08442	-1.08442	-0.116923		Unknown		chr1	35442778	35442825
A_16_P15445023	0.0346805	0.0040542	down	1.08712	-1.08712	-0.120505		Unknown		chr1	215546015	215546075
A_16_P00159144	0.00316725	6.22943e-05	up	1.2249	1.2249	0.292667		Unknown		chr1	144009906	144009966
A_16_P35194694	0.0253887	0.00241054	down	1.09519	-1.09519	-0.131182		Unknown		chr1	80714381	80714441
A_16_P15115808	0.0112314	0.000599247	down	1.07584	-1.07584	-0.10546		Unknown		chr1	50774206	50774266
A_16_P35371243	0.0173928	0.00126993	up	1.13892	1.13892	0.187671		Unknown		chr1	177981045	177981105
A_16_P15369956	0.0361183	0.00433104	up	1.12071	1.12071	0.164416		Unknown		chr1	184118185	184118245
A_16_P15244428	0.0171518	0.00123935	down	1.08437	-1.08437	-0.116858		Unknown		chr1	105666263	105666323
A_16_P15415019	0.0192154	0.00150426	up	1.11425	1.11425	0.156069		Unknown		chr1	203003918	203003972
A_16_P35234028	0.00672488	0.000243384	down	1.12202	-1.12202	-0.166093		Unknown		chr1	96772121	96772181
A_14_P119782	0.0272173	0.00270447	down	1.07359	-1.07359	-0.102437		Unknown		chr1	60907457	60907517
A_16_P15329275	0.0356416	0.00423691	up	1.13031	1.13031	0.176719		Unknown		chr1	166643906	166643966
A_16_P00029510	0.0391604	0.00493672	up	1.09403	1.09403	0.129648		Unknown		chr1	23511416	23511476
A_16_P15233397	0.024697	0.00230139	down	1.08016	-1.08016	-0.111244		Unknown		chr1	100414286	100414346
A_16_P00154677	0.0433107	0.0058633	down	1.09474	-1.09474	-0.130593		Unknown		chr1	117451731	117451791
A_16_P15180839	0.0287592	0.00296281	down	1.09827	-1.09827	-0.135237		Unknown		chr1	78494243	78494303
A_16_P00039821	0.0396677	0.00504481	up	1.08205	1.08205	0.11377		Unknown		chr1	32298919	32298979
A_16_P15022653	0.0295122	0.00310024	down	1.07293	-1.07293	-0.101559		Unknown		chr1	9260573	9260633
A_16_P15189542	0.0375783	0.00462491	down	1.12185	-1.12185	-0.165881		Unknown		chr1	82085815	82085875
A_16_P00002053	0.0401437	0.00515504	down	1.07307	-1.07307	-0.10175		Unknown		chr1	2694730	2694783
A_16_P15268980	0.00275843	4.7678e-05	down	1.13047	-1.13047	-0.17692		Unknown		chr1	116427506	116427566
A_16_P35369528	0.0159859	0.00109641	up	1.12435	1.12435	0.169095		Unknown		chr1	177257381	177257441
A_14_P103460	0.000632182	2.49577e-06	up	1.20999	1.20999	0.274991		Unknown		chr1	247136810	247136870
A_16_P15464985	0.0499507	0.00739309	up	1.10086	1.10086	0.138631		Unknown		chr1	223583232	223583292
A_16_P15211973	0.0128595	0.000753935	down	1.08143	-1.08143	-0.112938		Unknown		chr1	91279678	91279738
A_16_P35288745	0.0112314	0.000599247	down	1.1244	-1.1244	-0.169154		Unknown		chr1	120035253	120035313
A_16_P15373768	0.0142069	0.000899058	up	1.19168	1.19168	0.252993		Unknown		chr1	185672460	185672520
A_14_P137781	0.00748636	0.000294269	up	1.08159	1.08159	0.11315		Unknown		chr1	35449466	35449513
A_16_P00000200	0.0142069	0.000899058	down	1.10662	-1.10662	-0.146159		Unknown		chr1	936415	936472
A_16_P15522135	0.0268252	0.00264319	up	1.1388	1.1388	0.187513		Unknown		chr1	247644285	247644345
A_14_P134949	0.013608	0.000833951	down	1.16359	-1.16359	-0.218585		Unknown		chr1	194703561	194703621
A_16_P15150840	0.00882591	0.000394759	down	1.09398	-1.09398	-0.129585		Unknown		chr1	65515145	65515203
A_16_P00059335	0.0169113	0.00120946	down	1.12156	-1.12156	-0.165513		Unknown		chr1	47695840	47695900
A_16_P15438828	0.0371031	0.00452501	down	1.0907	-1.0907	-0.125251		Unknown		chr1	213107998	213108058
A_16_P15225112	0.00979613	0.000474534	up	1.15669	1.15669	0.210005		Unknown		chr1	97110679	97110739
A_14_P130448	0.0194917	0.00154081	up	1.11138	1.11138	0.152358		Homo sapiens myelodysplastic syndrome 2 translocation associated, mRNA (cDNA clone IMAGE:5229269).		chr1	23929148	23929208
A_16_P35151801	0.0217786	0.00186404	down	1.07859	-1.07859	-0.109153		Unknown		chr1	62797307	62797367
A_16_P15524752	0.0320304	0.00354816	down	1.07877	-1.07877	-0.109387		Unknown		chr1	249123805	249123865
A_16_P15235019	0.0128595	0.000753935	down	1.09236	-1.09236	-0.127449		Unknown		chr1	101108924	101108984
A_16_P15186820	0.0291367	0.00303081	down	1.10763	-1.10763	-0.14747		Unknown		chr1	81030365	81030425
A_16_P00023575	0.00422931	0.000105151	down	1.1735	-1.1735	-0.230816		Unknown		chr1	19186444	19186504
A_16_P00152627	0.0108926	0.000569148	down	1.14482	-1.14482	-0.195115		Unknown		chr1	115785694	115785754
A_16_P15325100	0.0324585	0.00362829	up	1.1282	1.1282	0.174018		Unknown		chr1	164871645	164871705
A_16_P15228834	0.0124937	0.000716657	down	1.12095	-1.12095	-0.164722		Unknown		chr1	98496858	98496918
A_16_P35462384	0.0499507	0.00739309	up	1.12254	1.12254	0.166766		Unknown		chr1	215006931	215006991
A_16_P15193412	0.0178973	0.00133319	down	1.07958	-1.07958	-0.110467		Unknown		chr1	83507057	83507117
A_16_P15094635	0.0337869	0.00387867	up	1.16537	1.16537	0.220789		Unknown		chr1	40968907	40968967
A_16_P15308526	0.0279629	0.00283095	up	1.15625	1.15625	0.209453		Unknown		chr1	157682430	157682490
A_16_P15143761	0.0157533	0.00106972	up	1.14991	1.14991	0.201523		Homo sapiens cDNA, FLJ98706.		chr1	62643897	62643957
A_16_P15246518	0.0200468	0.00161638	down	1.08352	-1.08352	-0.115722		Unknown		chr1	106745601	106745661
A_14_P131566	0.0275847	0.00276705	down	1.07977	-1.07977	-0.110725		Unknown		chr1	108879234	108879294
A_14_P109900	0.00796057	0.000327657	down	1.08393	-1.08393	-0.116273		Unknown		chr1	53523686	53523746
A_16_P35309639	0.0492988	0.00724052	up	1.09014	1.09014	0.124508		Unknown		chr1	152640478	152640538
A_14_P202150	0.0119295	0.000663939	down	1.07616	-1.07616	-0.105891		Homo sapiens protein transactivated by hepatitis B virus E antigen mRNA, complete cds.		chr1	68144537	68144597
A_16_P00215295	0.0236999	0.00214613	down	1.11135	-1.11135	-0.152318		Unknown		chr1	188849003	188849063
A_14_P118048	0.0492988	0.00724052	down	1.06667	-1.06667	-0.0931104		Unknown		chr1	43874710	43874770
A_16_P00260585	0.01382	0.000855151	up	1.147	1.147	0.197864		Unknown		chr1	220493817	220493875
A_16_P15521301	0.0166851	0.00118023	up	1.14664	1.14664	0.197418		full-length cDNA clone CS0DC007YK21 of Neuroblastoma Cot 25-normalized of Homo sapiens (human).		chr1	247180668	247180728
A_16_P15210826	0.0146462	0.000945046	down	1.12996	-1.12996	-0.176273		Unknown		chr1	90798619	90798679
A_16_P35310670	0.0456356	0.00638302	up	1.13388	1.13388	0.181271		Unknown		chr1	153088436	153088496
A_16_P35282670	0.0206135	0.00169535	down	1.0775	-1.0775	-0.107681		Unknown		chr1	117434762	117434822
A_16_P15302520	0.0108926	0.000569148	up	1.20935	1.20935	0.274235		Homo sapiens endogenous virus HERV-K chromosome 5 LTR-promoted mRNA sequence.		chr1	155095182	155095242
A_16_P15297558	0.00466429	0.000124782	up	1.17559	1.17559	0.233383		Unknown		chr1	152917513	152917573
A_16_P35343833	0.0037506	8.3477e-05	up	1.29864	1.29864	0.377004		Unknown		chr1	166450485	166450545
A_16_P00041158	0.0214998	0.00182048	up	1.12539	1.12539	0.170428		Unknown		chr1	33520774	33520834
A_16_P00111424	0.00936608	0.00043866	up	1.14643	1.14643	0.197144		Unknown		chr1	85101250	85101310
A_16_P03808243	0.0391604	0.00493672	up	1.08556	1.08556	0.118436		Unknown		chr1	223246824	223246884
A_16_P15158936	0.0107525	0.000554632	up	1.20941	1.20941	0.274298		Unknown		chr1	68982223	68982283
A_16_P15401973	0.0371031	0.00452501	up	1.15223	1.15223	0.204426		Unknown		chr1	197931471	197931531
A_16_P15312282	0.0257585	0.00246688	up	1.10084	1.10084	0.138603		Unknown		chr1	159438541	159438601
A_16_P00121115	0.00806983	0.000336541	up	1.13377	1.13377	0.181126		Unknown		chr1	91996193	91996253
A_16_P35408213	0.0375783	0.00462491	up	1.11445	1.11445	0.156327		Unknown		chr1	193239170	193239230
A_14_P109008	0.0186711	0.00143354	up	1.15451	1.15451	0.207277		Unknown		chr1	98563363	98563423
A_16_P15057059	0.00156718	1.57559e-05	up	1.15722	1.15722	0.210662		Unknown		chr1	23868792	23868852
A_16_P00037252	0.0108926	0.000569148	up	1.18369	1.18369	0.243287		Unknown		chr1	30333073	30333133
A_16_P15369835	0.0124937	0.000716657	up	1.13758	1.13758	0.185962		Unknown		chr1	184061701	184061761
A_16_P00283659	0.0499507	0.00739309	down	1.06032	-1.06032	-0.0844942		Unknown		chr1	238665496	238665556
A_16_P15193286	0.00404177	9.64654e-05	down	1.11155	-1.11155	-0.152568		Unknown		chr1	83456472	83456532
A_16_P15453288	0.00222307	3.12194e-05	up	1.29021	1.29021	0.367609		Unknown		chr1	218662755	218662815
A_14_P133560	0.0130419	0.000773242	down	1.10188	-1.10188	-0.139972		Unknown		chr1	188786652	188786712
A_16_P15395884	0.0117414	0.000647184	down	1.11226	-1.11226	-0.153497		Unknown		chr1	195266733	195266793
A_16_P35169522	0.0233508	0.00209655	up	1.11455	1.11455	0.156456		Unknown		chr1	70164060	70164120
A_16_P00268142	0.00936608	0.00043866	up	1.16074	1.16074	0.21505		Unknown		chr1	227538170	227538230
A_16_P00268190	0.0243671	0.00224853	up	1.12606	1.12606	0.171288		Unknown		chr1	227598979	227599038
A_16_P15022856	0.0328606	0.00371007	up	1.07762	1.07762	0.107849		Unknown		chr1	9339260	9339320
A_16_P15388104	0.0422732	0.00561802	up	1.17818	1.17818	0.236563		Unknown		chr1	191911251	191911311
A_16_P00160749	0.00179597	2.02568e-05	up	1.23091	1.23091	0.299725		Unknown		chr1	146998650	146998710
A_14_P128775	0.0433107	0.0058633	down	1.07193	-1.07193	-0.10021		Unknown		chr1	104852324	104852384
A_16_P35475530	0.00161875	1.67822e-05	up	1.29649	1.29649	0.374615		Homo sapiens cDNA FLJ40148 fis, clone TESTI2013610, highly similar to Homo sapiens solute carrier family 30, member 10 (SLC30A10), transcript variant 1, mRNA.		chr1	220046959	220047019
A_14_P137721	0.000442777	1.12214e-06	down	1.15128	-1.15128	-0.203241		Unknown		chr1	107682508	107682558
A_16_P35089387	0.0401437	0.00515504	down	1.0846	-1.0846	-0.117163		Unknown		chr1	36529138	36529198
A_14_P201233	0.00606379	0.000200845	down	1.10961	-1.10961	-0.150052		Unknown		chr1	90513417	90513477
A_16_P15160066	0.0146462	0.000945046	up	1.12327	1.12327	0.1677		Unknown		chr1	69587328	69587388
A_16_P15163901	0.00362795	7.87597e-05	down	1.09897	-1.09897	-0.136155		Unknown		chr1	71230966	71231021
A_14_P201504	0.0113969	0.000614846	down	1.10823	-1.10823	-0.148261		Unknown		chr1	117315363	117315423
A_16_P15235214	0.00458886	0.000121287	down	1.14675	-1.14675	-0.197551		Unknown		chr1	101212870	101212930
A_16_P15191101	0.00560299	0.00017485	down	1.09591	-1.09591	-0.132131		Unknown		chr1	82622529	82622589
A_16_P00204216	0.00717344	0.000271349	up	1.18155	1.18155	0.240677		Unknown		chr1	181234847	181234907
A_14_P115322	0.0287592	0.00296281	down	1.0644	-1.0644	-0.0900425		Unknown		chr1	79187289	79187349
A_16_P00155918	0.0171518	0.00123935	down	1.12268	-1.12268	-0.166952		Unknown		chr1	118316285	118316345
A_14_P201988	0.0438892	0.00598953	up	1.1406	1.1406	0.189795		Unknown		chr1	159552254	159552314
A_16_P00259913	0.0128595	0.000753935	up	1.12434	1.12434	0.16908		Homo sapiens cDNA FLJ40148 fis, clone TESTI2013610, highly similar to Homo sapiens solute carrier family 30, member 10 (SLC30A10), transcript variant 1, mRNA.		chr1	220010079	220010139
A_16_P35190487	0.000398628	8.15207e-07	down	1.1683	-1.1683	-0.224411		Unknown		chr1	78948791	78948851
A_16_P35265993	0.0417366	0.00549888	down	1.09041	-1.09041	-0.124873		Unknown		chr1	110502811	110502871
A_16_P03808131	0.0108926	0.000569148	down	1.10635	-1.10635	-0.145806		Unknown		chr1	1566562	1566607
A_16_P15239463	0.0057769	0.000184844	down	1.11078	-1.11078	-0.151571		Unknown		chr1	103192822	103192882
A_14_P201532	0.00191953	2.29429e-05	up	1.24152	1.24152	0.31211		Unknown		chr1	216674383	216674443
A_16_P00090891	0.0189459	0.00146851	down	1.10636	-1.10636	-0.145817		Unknown		chr1	70605029	70605089
A_14_P116060	0.00131774	1.10989e-05	down	1.12043	-1.12043	-0.164051		Unknown		chr1	71760012	71760072
A_16_P15465945	0.0200468	0.00161638	up	1.10473	1.10473	0.143691		Unknown		chr1	224089504	224089554
A_16_P00125270	0.0324585	0.00362829	up	1.06994	1.06994	0.0975266		Homo sapiens cDNA: FLJ20911 fis, clone ADSE00547.		chr1	95048828	95048888
A_16_P15245759	0.000814935	4.14768e-06	down	1.20697	-1.20697	-0.271394		Unknown		chr1	106368183	106368243
A_16_P35071687	0.0186711	0.00143354	up	1.09364	1.09364	0.129135		Homo sapiens cDNA FLJ32910 fis, clone TESTI2006209.		chr1	28614158	28614214
A_16_P15148654	0.0108926	0.000569148	down	1.13839	-1.13839	-0.186998		Unknown		chr1	64662608	64662668
A_16_P15223153	0.0412187	0.00538204	down	1.09683	-1.09683	-0.133335		Unknown		chr1	96209851	96209911
A_16_P00040932	0.00606379	0.000200845	up	1.15239	1.15239	0.204635		Unknown		chr1	33343217	33343277
A_16_P15274677	0.0422732	0.00561802	down	1.11669	-1.11669	-0.159226		Unknown		chr1	118789435	118789495
A_16_P15115973	0.00306768	5.87195e-05	down	1.11929	-1.11929	-0.162585		Unknown		chr1	50865786	50865846
A_16_P15038256	0.0268252	0.00264319	down	1.06699	-1.06699	-0.0935522		Unknown		chr1	16084226	16084280
A_16_P15178977	0.0123084	0.000698666	down	1.12324	-1.12324	-0.167662		Unknown		chr1	77737729	77737789
A_14_P108031	0.00334511	6.80448e-05	up	1.1283	1.1283	0.174149		Unknown		chr1	243419201	243419246
A_16_P15370156	0.0396677	0.00504481	down	1.09101	-1.09101	-0.125662		Unknown		chr1	184208949	184209009
A_16_P15171561	0.00480856	0.000132061	down	1.10494	-1.10494	-0.14397		Unknown		chr1	74471316	74471376
A_16_P35176199	0.0108926	0.000569148	down	2.10152	-2.10152	-1.07143		Unknown		chr1	72777659	72777719
A_14_P101075	0.0184213	0.00139934	down	1.08929	-1.08929	-0.12339		Unknown		chr1	83288651	83288711
A_16_P00060153	0.00480856	0.000132061	down	1.10191	-1.10191	-0.140006		Unknown		chr1	48250227	48250287
A_16_P15262662	0.0361183	0.00433104	down	1.1176	-1.1176	-0.160409		Unknown		chr1	113563291	113563351
A_16_P15069021	0.0396677	0.00504481	up	1.06994	1.06994	0.0975337		Homo sapiens PR01094 mRNA, complete cds.		chr1	29516022	29516082
A_16_P00192515	0.00235688	3.52671e-05	up	1.19256	1.19256	0.254058		Unknown		chr1	172597903	172597963
A_16_P00005984	0.00206755	2.67786e-05	down	1.13075	-1.13075	-0.177286		Unknown		chr1	5375649	5375709
A_16_P15073370	0.00369032	8.10859e-05	up	1.17983	1.17983	0.238575		Unknown		chr1	31579866	31579926
A_14_P135630	0.000870084	4.9014e-06	down	1.11586	-1.11586	-0.158151		Unknown		chr1	106622384	106622444
A_16_P15269874	0.0173928	0.00126993	down	1.09068	-1.09068	-0.125234		Unknown		chr1	116816490	116816550
A_14_P134196	0.0253887	0.00241054	down	1.06624	-1.06624	-0.0925286		Unknown		chr1	60719745	60719805
A_14_P108919	0.0295122	0.00310024	down	1.09576	-1.09576	-0.131926		Unknown		chr1	88079297	88079357
A_14_P115379	0.00615105	0.000206462	up	1.1149	1.1149	0.156908		Homo sapiens cDNA FLJ45305 fis, clone BRHIP3004193.		chr1	173383015	173383075
A_16_P15297917	0.00473557	0.000128373	up	1.22667	1.22667	0.294752		Unknown		chr1	153103762	153103822
A_16_P15376534	0.0146462	0.000945046	down	1.14656	-1.14656	-0.197308		Unknown		chr1	186776859	186776919
A_16_P35432401	0.0401437	0.00515504	up	1.08915	1.08915	0.123198		Unknown		chr1	202956011	202956071
A_16_P35168330	0.0295122	0.00310024	up	1.16803	1.16803	0.224077		Unknown		chr1	69637581	69637641
A_16_P15399365	0.0450598	0.00624935	down	1.08825	-1.08825	-0.122012		Unknown		chr1	196851901	196851961
A_16_P35349035	0.000524987	1.70813e-06	up	1.1924	1.1924	0.253874		Unknown		chr1	168571447	168571507
A_14_P101994	0.00683881	0.00025011	down	1.28641	-1.28641	-0.363347		Unknown		chr1	34833455	34833515
A_16_P15252292	0.0391604	0.00493672	down	1.06974	-1.06974	-0.0972546		Unknown		chr1	109230558	109230618
A_14_P114997	0.0184213	0.00139934	down	1.10648	-1.10648	-0.145971		Unknown		chr1	198465126	198465186
A_16_P00034591	0.00831134	0.00035499	up	1.16568	1.16568	0.221173		Unknown		chr1	27836464	27836524
A_16_P00189566	0.012114	0.000681097	up	1.13411	1.13411	0.181561		Unknown		chr1	170413520	170413580
A_16_P00166156	0.00964564	0.000462282	up	1.14785	1.14785	0.198934		Unknown		chr1	153250406	153250466
A_16_P00120622	0.0223882	0.00195404	down	1.10037	-1.10037	-0.137983		Unknown		chr1	91518823	91518883
A_16_P00000983	0.0456356	0.00638302	down	1.11517	-1.11517	-0.157265		Unknown		chr1	1878782	1878842
A_16_P00149526	0.0428059	0.00573948	down	1.08174	-1.08174	-0.113351		Unknown		chr1	113284050	113284110
A_16_P35115114	0.00411082	9.92823e-05	down	1.13852	-1.13852	-0.187162		Unknown		chr1	47290391	47290446
A_16_P35502200	0.0406627	0.00526743	up	1.12299	1.12299	0.167344		Unknown		chr1	231284422	231284482
A_16_P15139668	0.000798557	4.01089e-06	down	1.13718	-1.13718	-0.185456		Unknown		chr1	61067943	61068003
A_16_P15524588	0.0366139	0.00442706	down	1.11787	-1.11787	-0.160754		Unknown		chr1	248861830	248861890
A_16_P15146005	0.0107525	0.000554632	up	1.10343	1.10343	0.141991		Unknown		chr1	63601863	63601923
A_16_P00117680	0.00882591	0.000394759	down	1.09165	-1.09165	-0.126508		Unknown		chr1	89311718	89311778
A_16_P00232704	0.0444695	0.0061182	down	1.09269	-1.09269	-0.127882		Unknown		chr1	201399384	201399440
A_16_P15428116	0.0233508	0.00209655	up	1.14092	1.14092	0.190195		Unknown		chr1	208489156	208489216
A_14_P133196	0.0499507	0.00739309	up	1.20822	1.20822	0.272882		Unknown		chr1	77296309	77296369
A_16_P15385807	0.0119295	0.000663939	down	1.13257	-1.13257	-0.179596		Unknown		chr1	190745748	190745808
A_16_P15149992	0.0492988	0.00724052	down	1.11752	-1.11752	-0.160307		Unknown		chr1	65176973	65177033
A_16_P15385608	0.0356416	0.00423691	down	1.11518	-1.11518	-0.157277		Unknown		chr1	190657253	190657313
A_16_P00183919	0.0146462	0.000945046	up	1.13225	1.13225	0.179192		Unknown		chr1	166387079	166387139
A_16_P35277638	0.0102667	0.000513128	down	1.1686	-1.1686	-0.224787		Unknown		chr1	115311773	115311833
A_16_P00216146	0.0375783	0.00462491	up	1.13535	1.13535	0.183138		Unknown		chr1	189512828	189512888
A_16_P35318954	0.0422732	0.00561802	up	1.30011	1.30011	0.378634		Unknown		chr1	156326005	156326065
A_16_P15257243	0.0176383	0.0013012	down	1.10853	-1.10853	-0.148648		Unknown		chr1	111122492	111122552
A_16_P15081944	0.0217786	0.00186404	up	1.10672	1.10672	0.146292		Unknown		chr1	35412219	35412279
A_14_P136166	0.0257585	0.00246688	down	1.06419	-1.06419	-0.0897552		Unknown		chr1	99612871	99612931
A_14_P124142	0.0272173	0.00270447	up	1.10995	1.10995	0.150497		Unknown		chr1	50732061	50732121
A_16_P00238556	0.0075986	0.000302303	up	1.14691	1.14691	0.197747		Unknown		chr1	205296502	205296561
A_16_P00221245	0.0366139	0.00442706	down	1.06025	-1.06025	-0.084401		Unknown		chr1	193231760	193231820
A_16_P15243165	0.0391604	0.00493672	down	1.07906	-1.07906	-0.109779		Unknown		chr1	104911559	104911619
A_16_P00240678	0.013608	0.000833951	up	1.18638	1.18638	0.246568		Unknown		chr1	207160125	207160185
A_16_P15365126	0.0107525	0.000554632	up	1.12686	1.12686	0.172309		Unknown		chr1	182213884	182213943
A_16_P15156711	0.0272173	0.00270447	down	1.06659	-1.06659	-0.0930071		Homo sapiens protein transactivated by hepatitis B virus E antigen mRNA, complete cds.		chr1	68049375	68049434
A_16_P15294454	0.0433107	0.0058633	down	1.08952	-1.08952	-0.12369		Unknown		chr1	151569462	151569522
A_14_P118816	0.0176383	0.0013012	down	1.06806	-1.06806	-0.0949918		Unknown		chr1	101271466	101271526
A_14_P127165	0.0444695	0.0061182	up	1.11585	1.11585	0.158147		Unknown		chr1	234665500	234665560
A_16_P15365942	0.000870084	4.9014e-06	up	1.26858	1.26858	0.343215		Homo sapiens cDNA FLJ13112 fis, clone NT2RP3002587.		chr1	182581693	182581750
A_16_P35215587	0.0361183	0.00433104	down	1.08237	-1.08237	-0.114196		Homo sapiens cDNA clone IMAGE:5311323.		chr1	88907315	88907375
A_16_P00030449	0.0130419	0.000773242	up	1.16852	1.16852	0.224688		Unknown		chr1	24363394	24363454
A_16_P15310907	0.00185778	2.156e-05	up	1.24497	1.24497	0.316115		Unknown		chr1	158772503	158772563
A_16_P00248403	0.0492988	0.00724052	up	1.07693	1.07693	0.106926		Unknown		chr1	212593557	212593617
A_16_P15208609	0.0209055	0.00173615	down	1.14258	-1.14258	-0.192294		Unknown		chr1	89891440	89891500
A_16_P15271706	0.0010865	7.5246e-06	down	1.1433	-1.1433	-0.193205		Unknown		chr1	117537480	117537540
A_16_P00194245	0.00806983	0.000336541	up	1.15206	1.15206	0.204219		Unknown		chr1	174059546	174059606
A_14_P102562	0.00218735	3.02787e-05	up	1.20298	1.20298	0.266608		Unknown		chr1	77747236	77747296
A_16_P15194629	0.00228937	3.31846e-05	down	1.14607	-1.14607	-0.196695		Unknown		chr1	84009582	84009642
A_16_P15066146	0.0261198	0.00252442	up	1.12658	1.12658	0.171951		Unknown		chr1	28026015	28026075
A_16_P00216092	0.00949395	0.000450327	down	1.14142	-1.14142	-0.190827		Unknown		chr1	189470396	189470456
A_16_P15163085	0.0299319	0.00317112	down	1.08338	-1.08338	-0.115542		Unknown		chr1	70841618	70841678
A_16_P15295399	0.023028	0.00204802	up	1.09919	1.09919	0.136442		Unknown		chr1	151983474	151983534
A_16_P00232733	0.0412187	0.00538204	down	1.04601	-1.04601	-0.0648917		Unknown		chr1	201428774	201428832
A_16_P35279439	0.0107525	0.000554632	down	1.11181	-1.11181	-0.152908		Unknown		chr1	116150040	116150100
A_16_P15246414	0.0107525	0.000554632	down	1.14699	-1.14699	-0.197852		Unknown		chr1	106686814	106686874
A_16_P15397569	0.0159859	0.00109641	up	1.17445	1.17445	0.231984		Unknown		chr1	196058442	196058502
A_16_P15368583	0.024697	0.00230139	up	1.16154	1.16154	0.216041		Unknown		chr1	183572458	183572517
A_14_P108182	0.0333342	0.00379352	down	1.05055	-1.05055	-0.0711469		Unknown		chr1	177974859	177974919
A_16_P15208285	0.0130419	0.000773242	down	1.12518	-1.12518	-0.17016		Unknown		chr1	89686310	89686370
A_16_P15451834	0.0287592	0.00296281	down	1.1315	-1.1315	-0.178234		Unknown		chr1	218101031	218101091
A_16_P15260930	0.0118904	0.000655496	down	1.13496	-1.13496	-0.182647		Unknown		chr1	112754092	112754152
A_16_P15305653	0.0401437	0.00515504	up	1.11773	1.11773	0.160573		Unknown		chr1	156474499	156474559
A_16_P15048397	0.0223882	0.00195404	up	1.1418	1.1418	0.191316		Unknown		chr1	20202478	20202538
A_16_P35222372	0.00392519	9.10562e-05	down	1.10038	-1.10038	-0.137998		Unknown		chr1	91895190	91895250
A_16_P00296785	0.0209055	0.00173615	up	1.17143	1.17143	0.228266		Unknown		chr1	248381737	248381797
A_16_P15228982	0.0444695	0.0061182	down	1.09193	-1.09193	-0.126885		Unknown		chr1	98539879	98539939
A_16_P35378665	0.0351611	0.00414464	up	1.12307	1.12307	0.167444		Unknown		chr1	181084852	181084912
A_16_P00111870	0.00831134	0.00035499	down	1.1021	-1.1021	-0.140259		Unknown		chr1	85385362	85385422
A_16_P00027909	0.0144184	0.000921786	up	1.14402	1.14402	0.194111		Unknown		chr1	22424448	22424508
A_16_P15117372	0.0337869	0.00387867	up	1.1399	1.1399	0.18891		Unknown		chr1	51542844	51542904
A_16_P15161376	0.00345408	7.21537e-05	down	1.10064	-1.10064	-0.138345		Unknown		chr1	70170629	70170689
A_14_P103970	0.0166851	0.00118023	up	1.15324	1.15324	0.205689		Unknown		chr1	187451172	187451232
A_16_P35228891	0.0307738	0.00331732	down	1.10881	-1.10881	-0.149015		Homo sapiens cDNA, FLJ17533.		chr1	94626125	94626185
A_16_P35309107	0.0203308	0.00165543	up	1.11538	1.11538	0.157539		Unknown		chr1	152402569	152402629
A_16_P15220688	0.0346805	0.0040542	down	1.07676	-1.07676	-0.106702		Unknown		chr1	95206496	95206556
A_16_P00136867	0.00235688	3.52671e-05	down	1.18297	-1.18297	-0.242408		Unknown		chr1	103318391	103318451
A_16_P15091142	0.0010865	7.5246e-06	up	1.26223	1.26223	0.335971		Unknown		chr1	39416696	39416756
A_16_P15238942	0.00796057	0.000327657	up	1.18986	1.18986	0.250788		Unknown		chr1	102921280	102921340
A_16_P15275421	0.0257585	0.00246688	down	1.06776	-1.06776	-0.0945879		Unknown		chr1	119188141	119188201
A_16_P00259581	0.0243671	0.00224853	up	1.20044	1.20044	0.263561		Unknown		chr1	219786896	219786956
A_16_P00114152	0.00480856	0.000132061	down	1.12615	-1.12615	-0.171396		Unknown		chr1	87008928	87008988
A_16_P35420004	0.00895595	0.000405332	up	1.1508	1.1508	0.202641		Unknown		chr1	198331773	198331833
A_16_P00137819	0.0140134	0.000876849	up	1.1991	1.1991	0.261947		Unknown		chr1	104155243	104155297
A_16_P00114430	0.0257585	0.00246688	down	1.09652	-1.09652	-0.132929		Unknown		chr1	87231086	87231146
A_16_P15188740	0.0366139	0.00442706	down	1.10976	-1.10976	-0.150246		Unknown		chr1	81815963	81816023
A_16_P15140027	0.0106111	0.000540462	down	1.07941	-1.07941	-0.110237		Unknown		chr1	61231350	61231410
A_16_P00069000	0.0438892	0.00598953	down	1.0649	-1.0649	-0.0907137		Unknown		chr1	55242035	55242095
A_16_P15393158	0.0438892	0.00598953	down	1.0926	-1.0926	-0.127769		Unknown		chr1	194067134	194067194
A_16_P15140787	0.0272173	0.00270447	down	1.077	-1.077	-0.107016		Unknown		chr1	61525965	61526025
A_16_P15469808	0.0337869	0.00387867	up	1.13767	1.13767	0.186085		Unknown		chr1	225939179	225939239
A_16_P15298333	0.0333342	0.00379352	down	1.25509	-1.25509	-0.327786		Unknown		chr1	153286200	153286260
A_16_P15228924	0.0206135	0.00169535	down	1.10314	-1.10314	-0.141622		Unknown		chr1	98522394	98522454
A_16_P15239176	0.0112314	0.000599247	down	1.11624	-1.11624	-0.158647		Unknown		chr1	103056772	103056832
A_16_P35190783	0.00908792	0.000416169	down	1.12831	-1.12831	-0.174159		Homo sapiens mRNA; cDNA DKFZp686L21223 (from clone DKFZp686L21223).		chr1	79071922	79071982
A_16_P15159751	0.0132204	0.000793006	down	1.0881	-1.0881	-0.121809		Homo sapiens cDNA clone IMAGE:5425336, partial cds.		chr1	69398810	69398870
A_16_P15498951	0.0283729	0.00289619	up	1.14717	1.14717	0.19808		Unknown		chr1	238016609	238016669
A_16_P35177048	0.000900463	5.23823e-06	down	1.15609	-1.15609	-0.209253		Unknown		chr1	73165477	73165537
A_16_P15405263	0.0456356	0.00638302	down	1.08081	-1.08081	-0.112117		Unknown		chr1	199191925	199191985
A_16_P00173326	0.000883114	5.06713e-06	up	1.48605	1.48605	0.571486		Unknown		chr1	158741014	158741074
A_16_P00033305	0.0200468	0.00161638	up	1.1395	1.1395	0.188397		Unknown		chr1	26703141	26703201
A_16_P15142121	0.0146462	0.000945046	down	1.11754	-1.11754	-0.160322		Unknown		chr1	61930724	61930784
A_16_P15338217	0.00392519	9.10562e-05	up	1.18852	1.18852	0.249163		Unknown		chr1	170394085	170394145
A_14_P109836	0.0037506	8.3477e-05	up	1.19407	1.19407	0.255893		Unknown		chr1	33393537	33393597
A_16_P00149958	0.0106111	0.000540462	up	1.1242	1.1242	0.168897		Unknown		chr1	113709878	113709938
A_16_P00241380	0.00923183	0.000427277	down	1.16594	-1.16594	-0.221493		Unknown		chr1	207667861	207667921
A_16_P15087474	0.0401437	0.00515504	down	1.08195	-1.08195	-0.113629		Unknown		chr1	37825164	37825224
A_16_P15111929	0.0391604	0.00493672	up	1.12625	1.12625	0.171533		Unknown		chr1	48938567	48938627
A_14_P112785	0.01382	0.000855151	down	1.10669	-1.10669	-0.146253		Unknown		chr1	103282069	103282129
A_16_P15154199	0.0468282	0.00665813	up	1.14481	1.14481	0.195103		Unknown		chr1	66986864	66986924
A_16_P00227638	0.0115746	0.000630822	down	1.09636	-1.09636	-0.132718		Unknown		chr1	197993511	197993571
A_16_P15006474	0.0257585	0.00246688	up	1.131	1.131	0.177599		Unknown		chr1	2761324	2761384
A_16_P15177812	0.0115746	0.000630822	down	1.09567	-1.09567	-0.131812		Unknown		chr1	77192038	77192098
A_16_P15221635	0.0107525	0.000554632	down	1.11888	-1.11888	-0.16206		Homo sapiens transmembrane protein 56, mRNA (cDNA clone IMAGE:4801733), **** WARNING: chimeric clone ****.		chr1	95572483	95572543
A_16_P15201881	0.0214998	0.00182048	up	1.20652	1.20652	0.270849		Unknown		chr1	87051181	87051241
A_16_P35096738	0.0428059	0.00573948	up	1.11638	1.11638	0.158827		Unknown		chr1	39483246	39483306
A_14_P124263	0.00623806	0.000212226	up	1.24616	1.24616	0.317492		Unknown		chr1	242252159	242252219
A_16_P15266321	0.0113969	0.000614846	down	1.11081	-1.11081	-0.151611		Unknown		chr1	115242889	115242949
A_16_P15243950	0.0075986	0.000302303	down	1.11452	-1.11452	-0.156428		Unknown		chr1	105396468	105396528
A_16_P15470271	0.0422732	0.00561802	up	1.12652	1.12652	0.171879		Unknown		chr1	226122894	226122953
A_16_P15351021	0.00135262	1.18339e-05	up	1.22722	1.22722	0.295388		Unknown		chr1	176192837	176192897
A_16_P15122425	0.0386297	0.00483074	up	1.08361	1.08361	0.115847		Unknown		chr1	53939119	53939179
A_16_P15138490	0.0287592	0.00296281	down	1.07559	-1.07559	-0.105132		Unknown		chr1	60549341	60549401
A_16_P00247179	0.0295122	0.00310024	up	1.2618	1.2618	0.335489		Unknown		chr1	211672101	211672160
A_16_P00176506	0.0333342	0.00379352	up	1.12925	1.12925	0.175369		Unknown		chr1	161113312	161113372
A_16_P00156688	0.00411082	9.92823e-05	down	1.11402	-1.11402	-0.155773		Unknown		chr1	118846416	118846476
A_16_P00259984	0.0486394	0.00709079	up	1.11592	1.11592	0.158238		Homo sapiens cDNA FLJ40148 fis, clone TESTI2013610, highly similar to Homo sapiens solute carrier family 30, member 10 (SLC30A10), transcript variant 1, mRNA.		chr1	220085400	220085460
A_16_P15119052	0.0253887	0.00241054	up	1.11882	1.11882	0.161975		Unknown		chr1	52346748	52346808
A_16_P35247254	0.00191953	2.29429e-05	down	1.10982	-1.10982	-0.15032		Unknown		chr1	102172626	102172686
A_14_P102637	0.00923183	0.000427277	up	1.18068	1.18068	0.239612		Unknown		chr1	184319010	184319070
A_16_P15250991	0.0209055	0.00173615	down	1.09901	-1.09901	-0.136206		Unknown		chr1	108552607	108552667
A_16_P15405122	0.0492988	0.00724052	down	1.08256	-1.08256	-0.114449		Unknown		chr1	199134452	199134512
A_16_P15483030	0.0450598	0.00624935	up	1.11807	1.11807	0.161008		Unknown		chr1	231606414	231606474
A_16_P35411815	0.0126753	0.000735076	down	1.09461	-1.09461	-0.130421		Unknown		chr1	194862742	194862802
A_16_P15228759	0.0361183	0.00433104	down	1.09689	-1.09689	-0.133413		Unknown		chr1	98474929	98474989
A_16_P35262978	0.0275847	0.00276705	up	1.09158	1.09158	0.12642		Homo sapiens cDNA FLJ57956 complete cds.		chr1	109404792	109404852
A_16_P00057792	0.0346805	0.0040542	up	1.09927	1.09927	0.136543		Unknown		chr1	46259856	46259916
A_16_P15404799	0.0428059	0.00573948	up	1.13336	1.13336	0.180608		Unknown		chr1	198997446	198997506
A_14_P134575	0.0351611	0.00414464	down	1.07542	-1.07542	-0.104895		Homo sapiens solute carrier family 35 (UDP-N-acetylglucosamine (UDP-GlcNAc) transporter), member A3, mRNA (cDNA clone MGC:1421 IMAGE:3505772), complete cds.		chr1	100489194	100489249
A_16_P00158226	0.00923183	0.000427277	down	1.14975	-1.14975	-0.201323		Unknown		chr1	120071513	120071573
A_16_P35122793	0.0164415	0.00115165	up	1.12822	1.12822	0.174048		Unknown		chr1	50817321	50817381
A_16_P15279806	0.0486394	0.00709079	down	1.17033	-1.17033	-0.226919		Unknown		chr1	121149940	121150000
[truncated: 33,392 more rows]
