# Supplementary material for: Somatic Copy Number Alterations Associated with Japanese or Endometriosis in Ovarian Clear Cell Adenocarcinoma
Source: PLoS One. 2015 Feb 6;10(2):e0116977. doi: 10.1371/journal.pone.0116977 (PMC4319764; doi:10.1371/journal.pone.0116977)
Supplement: S2 Table — (XLSX) [file pone.0116977.s002.xlsx]

## Sheet: Sheet1
ProbeName	Corrected p-value	p-value	regulation	FCAbsolute	Fold change	Log Fold change	GeneSymbol	Description	Entrez Gene	Chromosome	Start	End
A_16_P01709488	0.0443259	3.94037e-06	up	1.16607	1.16607	0.22166	ABCA13	Homo sapiens ATP-binding cassette, sub-family A (ABC1), member 13 (ABCA13), mRNA.	154664	chr7	48438232	48438292
A_16_P01709466	0.0448076	9.48422e-06	up	1.1605	1.1605	0.214741	ABCA13	Homo sapiens ATP-binding cassette, sub-family A (ABC1), member 13 (ABCA13), mRNA.	154664	chr7	48427513	48427573
A_16_P18792403	0.0458668	1.60476e-05	down	1.11491	-1.11491	-0.156924	ADAMTSL2	Homo sapiens ADAMTS-like 2 (ADAMTSL2), transcript variant 2, mRNA.	9719	chr9	136414009	136414062
A_14_P113068	0.0458668	1.56552e-05	down	1.11332	-1.11332	-0.154867	ADAMTSL2	Homo sapiens ADAMTS-like 2 (ADAMTSL2), transcript variant 2, mRNA.	9719	chr9	136407013	136407071
A_16_P03607827	0.0439592	2.02225e-06	up	1.15901	1.15901	0.212892	ADRBK2	Homo sapiens adrenergic, beta, receptor kinase 2 (ADRBK2), mRNA.	157	chr22	26019458	26019518
A_16_P17901751	0.0458668	1.25121e-05	up	1.11482	1.11482	0.15681	BBS9	Homo sapiens Bardet-Biedl syndrome 9 (BBS9), transcript variant 3, mRNA.	27241	chr7	33560692	33560752
A_14_P126605	0.0467291	1.95425e-05	up	1.08535	1.08535	0.118162	BBS9	Homo sapiens Bardet-Biedl syndrome 9 (BBS9), transcript variant 3, mRNA.	27241	chr7	33645063	33645123
A_16_P17901392	0.0443259	3.94037e-06	up	1.11679	1.11679	0.159352	BBS9	Homo sapiens Bardet-Biedl syndrome 9 (BBS9), transcript variant 3, mRNA.	27241	chr7	33435409	33435469
A_16_P17902873	0.0477239	2.49357e-05	up	1.15634	1.15634	0.209572	BMPER	Homo sapiens BMP binding endothelial regulator (BMPER), mRNA.	168667	chr7	33960610	33960670
A_16_P17919757	0.0477239	2.20829e-05	up	1.14298	1.14298	0.192803	C7orf10	Homo sapiens chromosome 7 open reading frame 10 (C7orf10), mRNA.	79783	chr7	40773658	40773718
A_16_P01676196	0.0443259	2.71811e-06	up	1.13457	1.13457	0.182143	C7orf31	Homo sapiens chromosome 7 open reading frame 31 (C7orf31), mRNA.	136895	chr7	25208049	25208109
A_16_P17941153	0.0334986	1.40093e-07	up	1.14804	1.14804	0.199169	C7orf72	Homo sapiens chromosome 7 open reading frame 72 (C7orf72), mRNA.		chr7	50161769	50161829
A_16_P02196285	0.0458668	1.38265e-05	down	1.15811	-1.15811	-0.211773	CACNA1B	Homo sapiens calcium channel, voltage-dependent, N type, alpha 1B subunit (CACNA1B), mRNA.	774	chr9	140941820	140941880
A_16_P01686214	0.0477239	2.55468e-05	up	1.14857	1.14857	0.199835	CCDC129	Homo sapiens coiled-coil domain containing 129 (CCDC129), mRNA.	223075	chr7	31622760	31622820
A_16_P01650461	0.0443259	3.83795e-06	up	1.14032	1.14032	0.189443	COL28A1	Homo sapiens collagen, type XXVIII, alpha 1 (COL28A1), mRNA.	340267	chr7	7520927	7520987
A_16_P02191822	0.0458668	1.52719e-05	down	1.14493	-1.14493	-0.195259	COL5A1	Homo sapiens collagen, type V, alpha 1 (COL5A1), mRNA.	1289	chr9	137696250	137696310
A_16_P03218699	0.0477239	2.20829e-05	down	1.12156	-1.12156	-0.165505	COX10	Homo sapiens COX10 homolog, cytochrome c oxidase assembly protein, heme A: farnesyltransferase (yeast) (COX10), nuclear gene encoding mitochondrial protein, mRNA.	1352	chr17	14100117	14100177
A_16_P17889609	0.0458668	1.77131e-05	up	1.15308	1.15308	0.205491	CREB5	Homo sapiens cAMP responsive element binding protein 5 (CREB5), transcript variant 3, mRNA.	9586	chr7	28644934	28644994
A_16_P37933451	0.0477239	2.37548e-05	up	1.12638	1.12638	0.1717	DGKB	Homo sapiens diacylglycerol kinase, beta 90kDa (DGKB), transcript variant 1, mRNA.	1607	chr7	14346829	14346889
A_16_P36814080	0.0477239	2.37548e-05	down	1.13288	-1.13288	-0.179994	DMP1	Homo sapiens dentin matrix acidic phosphoprotein 1 (DMP1), transcript variant 2, mRNA.	1758	chr4	88571452	88571512
A_16_P37986087	0.0458668	1.16055e-05	up	1.10308	1.10308	0.141533	DPY19L1	Homo sapiens dpy-19-like 1 (C. elegans) (DPY19L1), mRNA.	23333	chr7	35011179	35011239
A_16_P40477333	0.0458668	1.81545e-05	down	1.14215	-1.14215	-0.191746	EFTUD1	Homo sapiens elongation factor Tu GTP binding domain containing 1 (EFTUD1), transcript variant 2, mRNA.	79631	chr15	82551218	82551278
A_16_P17952602	0.0477239	2.55468e-05	up	1.14927	1.14927	0.200721	EGFR	Homo sapiens epidermal growth factor receptor (erythroblastic leukemia viral (v-erb-b) oncogene homolog, avian) (EGFR), transcript variant 3, mRNA.	1956	chr7	55194566	55194626
A_16_P20221915	0.0458668	1.31536e-05	down	1.11813	-1.11813	-0.161091	EIF2AK4	Homo sapiens eukaryotic translation initiation factor 2 alpha kinase 4 (EIF2AK4), mRNA.	440275	chr15	40230012	40230072
A_16_P37991700	0.0458668	1.41751e-05	up	1.16117	1.16117	0.21558	ELMO1	Homo sapiens engulfment and cell motility 1 (ELMO1), transcript variant 1, mRNA.	9844	chr7	37157654	37157714
A_16_P37992137	0.0477239	2.37548e-05	up	1.17935	1.17935	0.237998	ELMO1	Homo sapiens engulfment and cell motility 1 (ELMO1), transcript variant 1, mRNA.	9844	chr7	37335224	37335284
A_14_P137337	0.0443259	3.64071e-06	up	1.17449	1.17449	0.232033	ELMO1	Homo sapiens engulfment and cell motility 1 (ELMO1), transcript variant 3, mRNA.	9844	chr7	36893956	36894016
A_16_P19793527	0.0448076	9.01492e-06	down	1.16817	-1.16817	-0.224248	ENOX1	Homo sapiens ecto-NOX disulfide-thiol exchanger 1 (ENOX1), transcript variant 1, mRNA.	55068	chr13	43798133	43798193
A_16_P02766209	0.0465274	1.90689e-05	down	1.13455	-1.13455	-0.182124	ENOX1	Homo sapiens ecto-NOX disulfide-thiol exchanger 1 (ENOX1), transcript variant 1, mRNA.	55068	chr13	43910509	43910569
A_14_P200263	0.0458668	1.86064e-05	down	1.21142	-1.21142	-0.276699	FCN2	Homo sapiens ficolin (collagen/fibrinogen domain containing lectin) 2 (hucolin) (FCN2), transcript variant SV0, mRNA.	2220	chr9	137776746	137776806
A_14_P139062	0.0476451	2.05233e-05	up	1.11638	1.11638	0.158834	FSHR	Homo sapiens follicle stimulating hormone receptor (FSHR), transcript variant 1, mRNA.	2492	chr2	49316731	49316791
A_16_P17942669	0.0477239	2.31846e-05	up	1.13159	1.13159	0.178351	GRB10	Homo sapiens growth factor receptor-bound protein 10 (GRB10), transcript variant 3, mRNA.	2887	chr7	50765727	50765787
A_16_P01712573	0.0439592	1.96826e-06	up	1.16492	1.16492	0.220235	GRB10	Homo sapiens growth factor receptor-bound protein 10 (GRB10), transcript variant 4, mRNA.	2887	chr7	50836913	50836973
A_16_P17942646	0.0448076	6.63248e-06	up	1.18996	1.18996	0.250915	GRB10	Homo sapiens growth factor receptor-bound protein 10 (GRB10), transcript variant 3, mRNA.	2887	chr7	50757601	50757661
A_16_P40430440	0.0448076	9.97681e-06	down	1.12567	-1.12567	-0.170781	HERC1	Homo sapiens hect (homologous to the E6-AP (UBE3A) carboxyl terminus) domain and RCC1 (CHC1)-like domain (RLD) 1 (HERC1), mRNA.	8925	chr15	64026857	64026917
A_16_P01663322	0.0448076	1.04938e-05	up	1.13379	1.13379	0.181147	ISPD	Homo sapiens isoprenoid synthase domain containing (ISPD), transcript variant 2, mRNA.		chr7	16296616	16296676
A_16_P03604036	0.0448076	8.14171e-06	up	1.15589	1.15589	0.208998	LOC96610	Homo sapiens BMS1 homolog, ribosome assembly protein (yeast) pseudogene (LOC96610), non-coding RNA.	96610	chr22	22674975	22675035
A_16_P40521392	0.0469491	2.00272e-05	down	1.09132	-1.09132	-0.126074	LRRC28	Homo sapiens leucine rich repeat containing 28 (LRRC28), mRNA.	123355	chr15	99857231	99857291
A_16_P02187466	0.0448076	9.01492e-06	down	1.16994	-1.16994	-0.226435	MED27	Homo sapiens mediator complex subunit 27 (MED27), mRNA.	9442	chr9	134736797	134736857
A_14_P115471	0.0458668	1.86064e-05	down	1.13057	-1.13057	-0.177046	MED27	Homo sapiens mediator complex subunit 27 (MED27), mRNA.	9442	chr9	134881699	134881759
A_16_P02187753	0.0448076	7.35028e-06	down	1.13524	-1.13524	-0.183003	MED27	Homo sapiens mediator complex subunit 27 (MED27), mRNA.	9442	chr9	134914389	134914449
A_16_P18788992	0.0458668	1.77131e-05	down	1.12917	-1.12917	-0.175258	NTNG2	Homo sapiens netrin G2 (NTNG2), mRNA.	84628	chr9	135073100	135073160
A_16_P17840082	0.0448076	4.8595e-06	up	1.12775	1.12775	0.173447	NXPH1	Homo sapiens neurexophilin 1 (NXPH1), mRNA.	30010	chr7	8540595	8540655
A_16_P40340093	0.0458668	1.41751e-05	down	1.16002	-1.16002	-0.214148	OCA2	Homo sapiens oculocutaneous albinism II (OCA2), mRNA.	4948	chr15	28239053	28239113
A_16_P17898349	0.0448076	5.53471e-06	up	1.13463	1.13463	0.182227	PDE1C	Homo sapiens phosphodiesterase 1C, calmodulin-dependent 70kDa (PDE1C), mRNA.	5137	chr7	32079449	32079509
A_16_P17898104	0.0458668	1.68608e-05	up	1.15641	1.15641	0.20965	PDE1C	Homo sapiens phosphodiesterase 1C, calmodulin-dependent 70kDa (PDE1C), mRNA.	5137	chr7	31988524	31988584
A_16_P01708667	0.0485698	2.68121e-05	up	1.14955	1.14955	0.201073	PKD1L1	Homo sapiens polycystic kidney disease 1 like 1 (PKD1L1), mRNA.	168507	chr7	47826219	47826279
A_16_P18800037	0.0448076	6.80537e-06	down	1.11343	-1.11343	-0.155016	PMPCA	Homo sapiens peptidase (mitochondrial processing) alpha (PMPCA), nuclear gene encoding mitochondrial protein, mRNA.	23203	chr9	139312366	139312416
A_14_P201453	0.0443259	2.79169e-06	down	1.1375	-1.1375	-0.185871	QSOX2	Homo sapiens quiescin Q6 sulfhydryl oxidase 2 (QSOX2), mRNA.	169714	chr9	139116713	139116773
A_16_P02187084	0.0477239	2.55468e-05	down	1.16153	-1.16153	-0.216026	RAPGEF1	Homo sapiens Rap guanine nucleotide exchange factor (GEF) 1 (RAPGEF1), transcript variant 2, mRNA.	2889	chr9	134478449	134478505
A_16_P01650755	0.0443259	2.25275e-06	up	1.14655	1.14655	0.197297	RPA3	Homo sapiens replication protein A3, 14kDa (RPA3), mRNA.	6119	chr7	7711574	7711634
A_16_P20205246	0.0477239	2.26273e-05	down	1.13641	-1.13641	-0.184489	RYR3	Homo sapiens ryanodine receptor 3 (RYR3), mRNA.	6263	chr15	33789009	33789069
A_16_P17828720	0.0439592	8.15534e-07	up	1.14433	1.14433	0.1945	SDK1	Homo sapiens sidekick homolog 1, cell adhesion molecule (chicken) (SDK1), transcript variant 1, mRNA.	221935	chr7	3482622	3482682
A_16_P01646792	0.0477239	2.26273e-05	up	1.14356	1.14356	0.193533	SDK1	Homo sapiens sidekick homolog 1, cell adhesion molecule (chicken) (SDK1), transcript variant 1, mRNA.	221935	chr7	3977829	3977889
A_16_P37908024	0.0458668	1.3486e-05	up	1.14379	1.14379	0.193821	SDK1	Homo sapiens sidekick homolog 1, cell adhesion molecule (chicken) (SDK1), transcript variant 1, mRNA.	221935	chr7	3646932	3646992
A_16_P17828735	0.0458668	1.72819e-05	up	1.17581	1.17581	0.23365	SDK1	Homo sapiens sidekick homolog 1, cell adhesion molecule (chicken) (SDK1), transcript variant 1, mRNA.	221935	chr7	3488487	3488547
A_16_P17828706	0.0485698	2.68121e-05	up	1.13162	1.13162	0.178386	SDK1	Homo sapiens sidekick homolog 1, cell adhesion molecule (chicken) (SDK1), transcript variant 1, mRNA.	221935	chr7	3476430	3476490
A_14_P104220	0.0458668	1.77131e-05	down	1.14663	-1.14663	-0.197405	SETX	Homo sapiens senataxin (SETX), mRNA.	23064	chr9	135137770	135137830
A_14_P100738	0.0485698	2.68121e-05	up	1.1331	1.1331	0.180273	SFRP4	Homo sapiens secreted frizzled-related protein 4 (SFRP4), mRNA.	6424	chr7	37953819	37953874
A_16_P03214494	0.0458668	1.81545e-05	down	1.12922	-1.12922	-0.175327	SHISA6	Homo sapiens shisa homolog 6 (Xenopus laevis) (SHISA6), mRNA.		chr17	11190068	11190128
A_16_P02189646	0.0448076	5.98201e-06	down	1.1481	-1.1481	-0.199246	SURF4	Homo sapiens surfeit 4 (SURF4), mRNA.	6836	chr9	136241745	136241805
A_16_P17847100	0.0477239	2.15509e-05	up	1.1266	1.1266	0.171974	THSD7A	Homo sapiens thrombospondin, type I, domain containing 7A (THSD7A), mRNA.	221981	chr7	11616333	11616393
A_14_P201573	0.0439592	4.13075e-07	up	1.14615	1.14615	0.19679	TMEM196	Homo sapiens transmembrane protein 196 (TMEM196), mRNA.	256130	chr7	19780688	19780748
A_16_P01707885	0.0448076	9.01492e-06	up	1.13079	1.13079	0.177333	TNS3	Homo sapiens tensin 3 (TNS3), mRNA.	64759	chr7	47349300	47349360
A_16_P18643550	0.0498369	2.81369e-05	down	1.17698	-1.17698	-0.235091	TRPM3	Homo sapiens transient receptor potential cation channel, subfamily M, member 3 (TRPM3), transcript variant 9, mRNA.	80036	chr9	73525809	73525869
A_16_P18790818	0.0458668	1.86064e-05	down	1.16654	-1.16654	-0.222236	TSC1	Homo sapiens tuberous sclerosis 1 (TSC1), transcript variant 1, mRNA.	7248	chr9	135779858	135779918
A_14_P113310	0.0458668	1.31536e-05	down	1.12706	-1.12706	-0.172566	TTF1	Homo sapiens transcription termination factor, RNA polymerase I (TTF1), mRNA.	7270	chr9	135261939	135261999
A_16_P18798831	0.0458668	1.77131e-05	down	1.11449	-1.11449	-0.156382	UBAC1	Homo sapiens UBA domain containing 1 (UBAC1), mRNA.	10422	chr9	138838211	138838269
A_16_P17914952	0.0477239	2.26273e-05	up	1.12838	1.12838	0.174252	VPS41	Homo sapiens vacuolar protein sorting 41 homolog (S. cerevisiae) (VPS41), transcript variant 1, mRNA.	27072	chr7	38847667	38847727
A_16_P38033102	0.0498369	2.81369e-05	up	1.11671	1.11671	0.159249	VSTM2A	Homo sapiens V-set and transmembrane domain containing 2A (VSTM2A), mRNA.	222008	chr7	54630424	54630484
A_16_P38033078	0.0448076	1.02322e-05	up	1.1455	1.1455	0.195983	VSTM2A	Homo sapiens V-set and transmembrane domain containing 2A (VSTM2A), mRNA.	222008	chr7	54623231	54623291
A_16_P17892988	0.0458668	1.41751e-05	up	1.11957	1.11957	0.162942	WIPF3	Homo sapiens WAS/WASL interacting protein family, member 3 (WIPF3), mRNA.	644150	chr7	29934145	29934205
A_16_P39939171	0.0477239	2.55468e-05	down	1.15013	-1.15013	-0.201801	ZC3H13	Homo sapiens zinc finger CCCH-type containing 13 (ZC3H13), mRNA.	23091	chr13	46553898	46553958
A_16_P01719069	0.0477239	2.43384e-05	up	1.14511	1.14511	0.195485	ZNF713	Homo sapiens zinc finger protein 713 (ZNF713), mRNA.	349075	chr7	55996037	55996097
A_16_P17894143	0.0448076	1.02322e-05	up	1.13844	1.13844	0.187059	ZNRF2	Homo sapiens zinc and ring finger 2 (ZNRF2), mRNA.	223082	chr7	30395447	30395507
A_16_P17538286	0.0477239	2.55468e-05	up	1.09461	1.09461	0.13042		Homo sapiens cDNA FLJ50861 complete cds, moderately similar to Homo sapiens patched domain containing 1 (PTCHD1), mRNA.		chr6	48050151	48050211
A_16_P17844163	0.0458668	1.2829e-05	up	1.14817	1.14817	0.199337		Unknown		chr7	10341320	10341380
A_16_P17943342	0.0439592	9.64196e-07	up	1.15106	1.15106	0.202963		Unknown		chr7	51074004	51074064
A_16_P21352397	0.0439592	1.71847e-06	up	1.1677	1.1677	0.223671		Unknown		chr22	49711442	49711502
A_16_P17852426	0.0443259	2.94463e-06	up	1.12958	1.12958	0.175792		Unknown		chr7	13820454	13820514
A_14_P139178	0.0448076	5.39286e-06	up	1.14143	1.14143	0.190849		Unknown		chr7	7044309	7044369
A_16_P01700077	0.0458668	1.2829e-05	up	1.11292	1.11292	0.154347		Unknown		chr7	41397522	41397582
A_16_P17904395	0.0448076	6.63248e-06	up	1.11671	1.11671	0.159255		Unknown		chr7	34577370	34577430
A_16_P01717788	0.0485131	2.61722e-05	up	1.12528	1.12528	0.170283		Unknown		chr7	54889401	54889461
A_16_P01648188	0.0448076	4.8595e-06	up	1.15681	1.15681	0.210148		Unknown		chr7	5127772	5127832
A_16_P41556338	0.0448076	8.35235e-06	up	1.1703	1.1703	0.226881		Unknown		chr22	50147407	50147464
A_16_P17867325	0.0443259	4.04541e-06	up	1.14458	1.14458	0.194823		Unknown		chr7	19682392	19682452
A_16_P18797237	0.0493818	2.74669e-05	down	1.12816	-1.12816	-0.173969		Unknown		chr9	138205166	138205226
A_16_P38035069	0.0458668	1.48976e-05	up	1.13554	1.13554	0.183384		Unknown		chr7	55426104	55426164
A_16_P17940304	0.0448076	7.16417e-06	up	1.14392	1.14392	0.193981		Unknown		chr7	49708643	49708703
A_16_P19005057	0.0467291	1.95425e-05	up	1.18422	1.18422	0.243936		Unknown		chr10	87112020	87112080
A_16_P01644874	0.0477239	2.10311e-05	up	1.1701	1.1701	0.226633		Unknown		chr7	2546766	2546816
A_16_P21287739	0.0477239	2.37548e-05	up	1.15261	1.15261	0.204902		Homo sapiens immunoglobulin lambda variable 2-14, mRNA (cDNA clone IMAGE:3059293).		chr22	22701957	22702017
A_16_P17877438	0.0477239	2.55468e-05	up	1.08857	1.08857	0.12244		Homo sapiens cDNA FLJ32868 fis, clone TESTI2003781.		chr7	23996048	23996093
A_14_P111669	0.0477239	2.37548e-05	up	1.10133	1.10133	0.139248		Unknown		chr7	36789566	36789626
A_16_P01702000	0.0458668	1.81545e-05	up	1.16059	1.16059	0.214855		Unknown		chr7	42528566	42528626
A_16_P17934454	0.0448076	1.02322e-05	up	1.16946	1.16946	0.225843		Unknown		chr7	47134395	47134455
A_14_P104952	0.0458668	1.45321e-05	up	1.11341	1.11341	0.15499		Unknown		chr7	38062443	38062503
A_14_P126346	0.0458668	1.64494e-05	up	1.13053	1.13053	0.177		Unknown		chr7	54326075	54326135
A_16_P03637616	0.0443259	4.15313e-06	up	1.15425	1.15425	0.206957		Unknown		chr22	48079578	48079638
A_16_P38015917	0.0458668	1.60476e-05	up	1.13464	1.13464	0.18224		Unknown		chr7	47084267	47084327
A_14_P113826	0.0458668	1.22026e-05	down	1.12416	-1.12416	-0.168846		Unknown		chr9	134000350	134000409
A_16_P17892630	0.0448076	7.16417e-06	up	1.15244	1.15244	0.204698		Unknown		chr7	29792855	29792915
A_16_P17952109	0.0448076	7.16417e-06	up	1.15346	1.15346	0.205969		Unknown		chr7	55022576	55022636
A_16_P38023795	0.0448076	8.35235e-06	up	1.12488	1.12488	0.169772		Unknown		chr7	50493820	50493880
SRN_13324	0.0477239	2.49357e-05	down	1.17067	-1.17067	-0.227335
A_16_P17949934	0.0439592	1.20345e-06	up	1.13322	1.13322	0.180424		Unknown		chr7	53991880	53991940
A_16_P02192469	0.0458668	1.86064e-05	down	1.16266	-1.16266	-0.217426		Unknown		chr9	138114583	138114643
A_16_P17951655	0.0458668	1.64494e-05	up	1.14064	1.14064	0.189848		Unknown		chr7	54806572	54806632
A_16_P01645755	0.0458668	1.25121e-05	up	1.14198	1.14198	0.191533		Unknown		chr7	3241101	3241159
A_16_P17925481	0.0448076	8.14203e-06	up	1.1324	1.1324	0.179379		Unknown		chr7	43029143	43029203
A_16_P03610911	0.0458668	1.25121e-05	up	1.15369	1.15369	0.206252		Unknown		chr22	28075235	28075295
A_16_P01705733	0.0458668	1.68608e-05	up	1.16352	1.16352	0.218495		Unknown		chr7	45611076	45611135
A_16_P17949614	0.0448076	9.72754e-06	up	1.11117	1.11117	0.152078		Unknown		chr7	53836907	53836967
A_16_P38029892	0.0448076	9.48422e-06	up	1.14211	1.14211	0.191699		Unknown		chr7	53111957	53112017
A_16_P17947121	0.0448076	1.04938e-05	up	1.16085	1.16085	0.215179		Unknown		chr7	52709444	52709504
A_16_P17939047	0.0448076	7.35028e-06	up	1.10925	1.10925	0.149584		Unknown		chr7	49084427	49084487
A_16_P17931921	0.0439592	1.8145e-06	up	1.15421	1.15421	0.206904		Unknown		chr7	45939125	45939185
A_16_P17842914	0.0458668	1.10363e-05	up	1.12343	1.12343	0.167913		Unknown		chr7	9764711	9764770
A_16_P01647525	0.0469491	2.00272e-05	up	1.16305	1.16305	0.217914		Unknown		chr7	4476911	4476971
A_14_P109726	0.0477239	2.43384e-05	up	1.0848	1.0848	0.117428		Unknown		chr7	9392369	9392429
A_14_P120200	0.0448076	8.56786e-06	up	1.13757	1.13757	0.185949		Unknown		chr7	46256428	46256488
A_16_P17921263	0.0448076	9.24673e-06	up	1.12619	1.12619	0.171449		Unknown		chr7	41349613	41349673
A_16_P01713592	0.0458668	1.68608e-05	up	1.15575	1.15575	0.20883		Unknown		chr7	51653640	51653700
A_16_P17939710	0.0448076	8.78867e-06	up	1.10203	1.10203	0.140168		Unknown		chr7	49415505	49415565
A_16_P17876674	0.0448076	9.24673e-06	up	1.11939	1.11939	0.162706		Unknown		chr7	23540798	23540858
A_16_P17949517	0.0439592	1.01931e-06	up	1.114	1.114	0.155743		Unknown		chr7	53775878	53775938
A_16_P01695371	0.0458668	1.16055e-05	up	1.12232	1.12232	0.166478		Homo sapiens cDNA: FLJ22748 fis, clone KAIA0249.		chr7	38277545	38277605
A_16_P17946038	0.0477239	2.31846e-05	up	1.13045	1.13045	0.176903		Unknown		chr7	52242242	52242302
A_16_P17845497	0.0443259	4.2636e-06	up	1.11741	1.11741	0.160157		Unknown		chr7	11008551	11008611
A_16_P17851799	0.0443259	3.36296e-06	up	1.11911	1.11911	0.162352		Unknown		chr7	13547382	13547442
A_16_P37947884	0.0458668	1.2829e-05	up	1.14247	1.14247	0.192152		Unknown		chr7	20042242	20042302
A_16_P17924643	0.0458668	1.45321e-05	up	1.13189	1.13189	0.178738		Unknown		chr7	42631982	42632042
A_16_P17896073	0.0439592	1.49929e-06	up	1.11962	1.11962	0.163006		Unknown		chr7	31172499	31172559
A_16_P01712819	0.0477239	2.26273e-05	up	1.11685	1.11685	0.159438		Unknown		chr7	51048326	51048386
